# Supplementary material for: MCE domain proteins: conserved inner membrane lipid-binding proteins required for outer membrane homeostasis
Source: PubMed Central journal article supplement (PMC5561183; doi:10.1038/s41598-017-09111-6), 2017-08-17
Supplement: 41598_2017_9111_MOESM1_ESM.pdf [file 41598_2017_9111_MOESM1_ESM.pdf]

## MCE domain proteins: conserved inner membrane lipid-binding proteins required for outer membrane homeostasis

Georgia L. Isom<sup>1</sup>, Nathaniel J. Davies<sup>2</sup>, Zhi-Soon Chong<sup>3</sup>, Jack A. Bryant<sup>1</sup>, Mohammed Jamshad<sup>1</sup>, Maria Sharif<sup>1</sup>, Adam F. Cunningham<sup>1</sup>, Timothy J. Knowles<sup>1</sup>, Shu-Sin Chng<sup>3</sup>, Jeffrey A. Cole<sup>1</sup>, Ian R. Henderson<sup>1\*</sup>

1. Institute of Microbiology and Infection, University of Birmingham
  2. Institute of Immunology and Immunotherapy, University of Birmingham
  3. Department of Chemistry, National University of Singapore
- \* Corresponding author: I.R.Henderson@bham.ac.uk

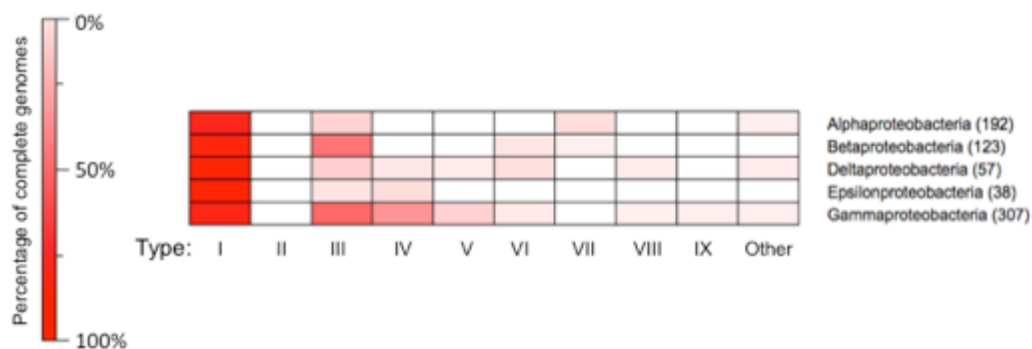

**Supplementary figure S1.** A heat map showing the distribution of MCE protein architectures across the major classes of Proteobacteria. For architecture information see supplementary table 1. The colours are based on percentages ranging from 0% (white) to 100% (bright red). The classes are displayed on the right of the heat map and the number of species is in brackets.



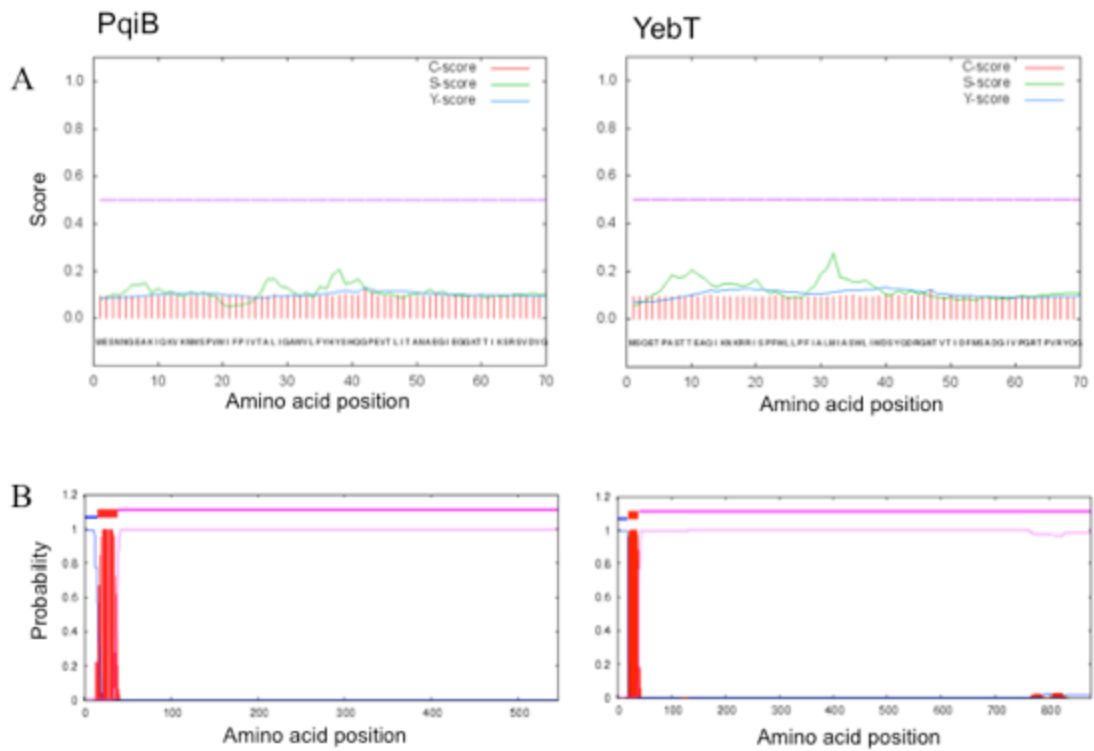

**Supplementary figure S3.** A) Cleavable signal peptide predictions of PqiB and YebT using SignalP 4.1 server and B) the transmembrane helix predictions of PqiB and YebT using the TMHMM server.

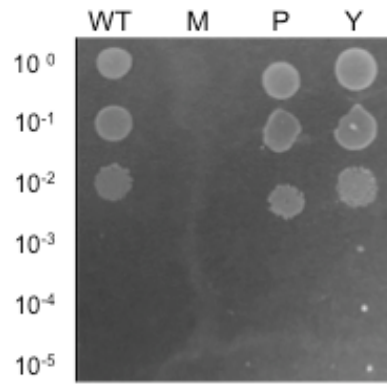

**Supplementary figure S4.** Dilutions of the WT strain and  $\Delta mlaD$ ,  $\Delta pqiAB$  and  $\Delta yebST$  deletion strains on LB agar supplemented with 0.5% SDS and 1.1 mM EDTA. The plates were prepared as described previously.

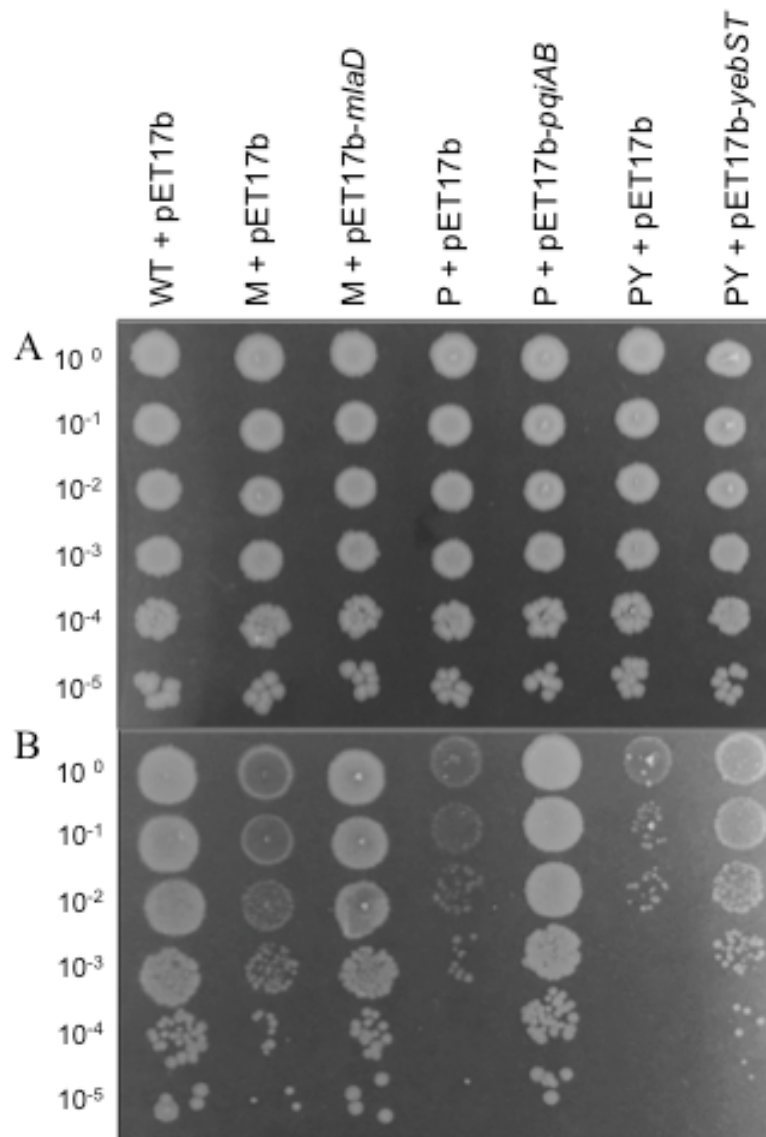

**Supplementary figure S5.** Complementation of the phenotypes of *mIaD*, *pqiAB* and *pqiAB yebST* mutants on 1% lauryl sulfobetaine: (A) LB agar, (B) 1% lauryl sulfobetaine. The plates were prepared as described previously.

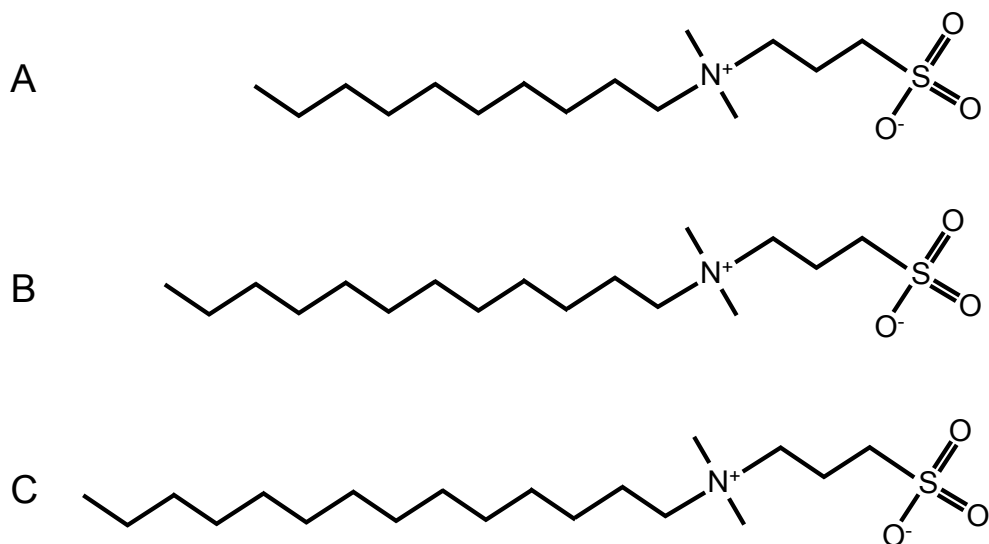

**Supplementary figure S6.** Chemical structures of A) caprylyl sulfobetaine B) lauryl sulfobetaine and C) myristyl sulfobetaine.

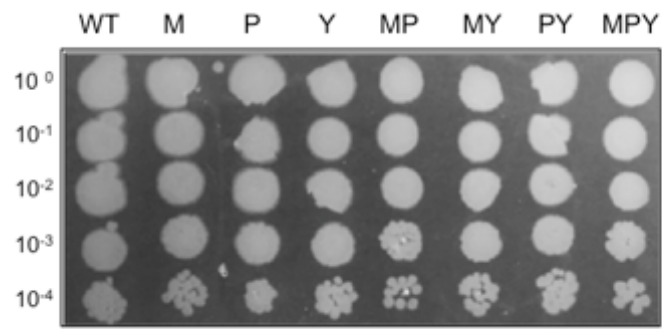

**Supplementary figure S7.** Dilutions of the WT strain and all mutants on LB agar supplemented with 1% SDS. The plates were prepared as described previously.

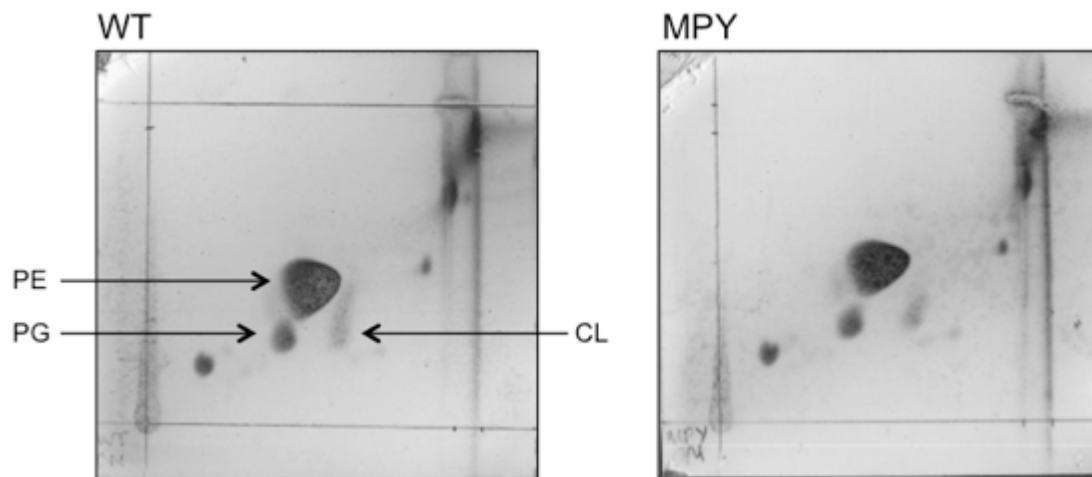

**Supplementary figure S8.** Outer membrane lipid profiles of the parent strain and the *mld* *pqiAB* *yebST* mutant. Lipids were extracted from outer membranes and separated by TLC in 65:25:4 chloroform:methanol:water (direction 1) and 80:12:15:4 chloroform:methanol: acetic acid:water (direction 2).



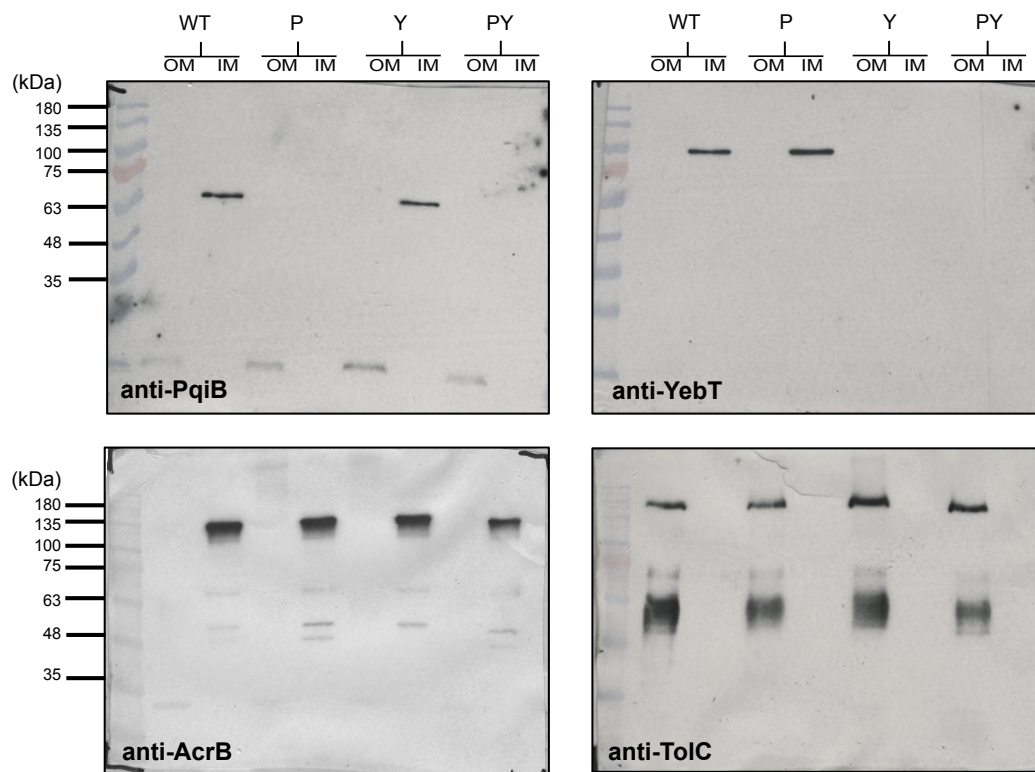

**Supplementary figure S9.** Full western blots to identify the locations of PqiB and YebT in *E. coli* K-12 BW25113.

## Supplementary table S1: Architectures for MCE proteins

| Architecture no. | No. proteins | Description                                                                                                                                          |
|------------------|--------------|------------------------------------------------------------------------------------------------------------------------------------------------------|
| 1                | 11012        | MCE                                                                                                                                                  |
| 2                | 2718         | MCE, DUF3407                                                                                                                                         |
| 3                | 2026         | MCE, MCE, MCE                                                                                                                                        |
| 4                | 1042         | MCE, MCE, MCE, MCE, MCE, MCE, MCE                                                                                                                    |
| 5                | 236          | MCE, MCE, MCE, MCE, MCE, MCE                                                                                                                         |
| 6                | 125          | MCE, MCE                                                                                                                                             |
| 7                | 35           | MCE, DUF330                                                                                                                                          |
| 8                | 20           | MCE, MCE, MCE, MCE                                                                                                                                   |
| 9                | 15           | MCE, MCE, MCE, MCE, MCE                                                                                                                              |
| 10               | 8            | MCE, MCE, DUF3407                                                                                                                                    |
| 11               | 7            | MCE, MCE, MCE, MCE, MCE, MCE, MCE, MCE                                                                                                               |
| 12               | 4            | MCE, DUF3407, MCE                                                                                                                                    |
| 13               | 4            | MCE, MCE, MCE, DUF330                                                                                                                                |
| 14               | 2            | MCE, AP2                                                                                                                                             |
| 15               | 2            | PqiA, PqiA, MCE, MCE, MCE, DUF330                                                                                                                    |
| 16               | 2            | PqiA, MCE, MCE                                                                                                                                       |
| 17               | 2            | MCE, PLU-1                                                                                                                                           |
| 18               | 2            | MCE, OmpA                                                                                                                                            |
| 19               | 1            | MCE, MCE, MCE, MCE, Molybdopterin                                                                                                                    |
| 20               | 1            | PqiA, PqiA, MCE, MCE, MCE, MCE, MCE, MCE, MCE, MCE, Nol1_Nop2_Fmu, Methyltransf_31, Methyltransf_18, Methyltransf_26, Nol1_Nop2_Fmu, Nol1_Nop2_Fmu_2 |
| 21               | 1            | MCE, MCE                                                                                      |
| 22               | 1            | MCE, DUF4455                                                                                                                                         |
| 23               | 1            | OTCace_N, OTCace, MCE                                                                                                                                |
| 24               | 1            | DUF3407, MCE                                                                                                                                         |
| 25               | 1            | MCE, Inositol_P                                                                                                                                      |

26 1 Permease, MCE, Tol\_Tol\_Ttg2, STAS\_2, BolA  
27 1 MCE, Bacillus\_HBL  
28 1 MCE, RTX  
29 1 MCE, Serine\_rich  
30 1 MCE, MCE, MCE, MCE, PqiA, MCE, MCE, MCE  
31 1 MCE, DUF3407, MCE, DUF3407  
32 1 MCE, DUF3407, DUF3407  
33 1 PqiA, MCE, MCE, MCE, MCE, MCE, Nol1\_Nop2\_Fmu, Nol1\_Nop2\_Fmu\_2  
34 1 MCE, LXG  
35 1 MCE, GCN5L1  
36 1 ABC\_tran, MCE  
37 1 NDUFA12, MCE, DUF2155  
38 1 MreC, MCE, MCE

## Supplementary table S2: IDs for proteins used in cluster analysis

| Uniprot ID                     | Arch | Phylum          | Class               | Species                           |
|--------------------------------|------|-----------------|---------------------|-----------------------------------|
| tr W7QLA0 W7QLA0_9ALTE         | 3    | Proteobacteria  | Gammaproteobacteria | Catenovulum agarivorans           |
| tr Q1JX22 Q1JX22_DESAC         | 3    | Proteobacteria  | Deltaproteobacteria | Desulfuromonas acetoxidans        |
| tr Q2BQQ8 Q2BQQ8_NEPCE         | 3    | Proteobacteria  | Gammaproteobacteria | Neptuniibacter caesariensis       |
| tr B5JP82 B5JP82_9BACT         | 3    | Verrucomicrobia | Verrucomicrobiae    | Verrucomicrobiae bacterium DG1235 |
| tr C4L8N7 C4L8N7_TOLAT         | 3    | Proteobacteria  | Gammaproteobacteria | Tolumonas auensis                 |
| tr Q0HUV4 Q0HUV4_SHESR         | 3    | Proteobacteria  | Gammaproteobacteria | Shewanella sp. MR-7               |
| tr R1GTU0 R1GTU0_9GAMM         | 3    | Proteobacteria  | Gammaproteobacteria | Grimontia indica                  |
| tr G2J562 G2J562_PSEUL         | 3    | Proteobacteria  | Betaproteobacteria  | Pseudogulbenkiania sp. NH8B       |
| tr K1IQ67 K1IQ67_9GAMM         | 3    | Proteobacteria  | Gammaproteobacteria | Aeromonas veronii                 |
| tr A0A085APC5 A0A085APC5_9GAMM | 3    | Proteobacteria  | Gammaproteobacteria | Halomonas sp. KO116               |
| tr A0A090PG68 A0A090PG68_9VIBR | 3    | Proteobacteria  | Gammaproteobacteria | Vibrio ponticus                   |
| tr I9P2X1 I9P2X1_9ALTE         | 3    | Proteobacteria  | Gammaproteobacteria | Alishewanella agri                |
| tr D4ZEJ0 D4ZEJ0_SHEVD         | 3    | Proteobacteria  | Gammaproteobacteria | Shewanella violacea               |
| tr A3Y6F5 A3Y6F5_9GAMM         | 3    | Proteobacteria  | Gammaproteobacteria | Marinomonas sp. MED121            |
| tr W1RZL0 W1RZL0_9GAMM         | 3    | Proteobacteria  | Gammaproteobacteria | Marinomonas profundimaris         |
| tr A0A084IRA0 A0A084IRA0_9GAMM | 3    | Proteobacteria  | Gammaproteobacteria | Salinisphaera hydrothermalis      |
| tr F7NS36 F7NS36_9GAMM         | 3    | Proteobacteria  | Gammaproteobacteria | Rheinheimera sp. A13L             |
| tr D8KBC3 D8KBC3_NITWC         | 3    | Proteobacteria  | Gammaproteobacteria | Nitrosococcus watsonii            |
| tr K2K842 K2K842_9GAMM         | 3    | Proteobacteria  | Gammaproteobacteria | Idiomarina xiamenensis            |
| tr B4WYV8 B4WYV8_9GAMM         | 3    | Proteobacteria  | Gammaproteobacteria | Alcanivorax sp. DG881             |
| tr Q47ZJ5 Q47ZJ5_COLP3         | 3    | Proteobacteria  | Gammaproteobacteria | Colwellia psychrerythraea         |
| tr K6XBP4 K6XBP4_9ALTE         | 3    | Proteobacteria  | Gammaproteobacteria | Glaciecola arctica                |
| tr A0A0A0DWT9 A0A0A0DWT9_9SPIO | 3    | Spirochaetes    | Spirochaetia        | Spirochaeta sp. JC202             |
| tr H5TE19 H5TE19_9ALTE         | 3    | Proteobacteria  | Gammaproteobacteria | Glaciecola punicea                |

|                                |    |                |                     |                                     |
|--------------------------------|----|----------------|---------------------|-------------------------------------|
| tr A0LD19 A0LD19_MAGSM         | 3  | Proteobacteria | Alphaproteobacteria | Magnetococcus marinus               |
| tr A3UYZ0 A3UYZ0_VIBSP         | 3  | Proteobacteria | Gammaproteobacteria | Vibrio splendidus                   |
| tr A0A066TDG6 A0A066TDG6_9GAMM | 3  | Proteobacteria | Gammaproteobacteria | Gilliamella apicola                 |
| tr Q5QYR9 Q5QYR9_IDILO         | 3  | Proteobacteria | Gammaproteobacteria | Idiomarina loihiensis               |
| tr A4C4S4 A4C4S4_9GAMM         | 3  | Proteobacteria | Gammaproteobacteria | Pseudoalteromonas tunicata          |
| tr A0A0A0DA86 A0A0A0DA86_9PROT | 3  | Proteobacteria | Alphaproteobacteria | Inquilinus limosus                  |
| tr I3Y552 I3Y552_THIV6         | 3  | Proteobacteria | Gammaproteobacteria | Thiocystis violascens               |
| tr Q21EW5 Q21EW5_SACD2         | 3  | Proteobacteria | Gammaproteobacteria | Saccharophagus degradans            |
| tr G8APC9 G8APC9_AZOBR         | 3  | Proteobacteria | Alphaproteobacteria | Azospirillum brasilense             |
| tr F1VUW1 F1VUW1_9BURK         | 3  | Proteobacteria | Betaproteobacteria  | Oxalobacteraceae bacterium IMCC9480 |
| tr K0EE59 K0EE59_ALTMB         | 3  | Proteobacteria | Gammaproteobacteria | Alteromonas macleodii               |
| tr A0A077ZKM6 A0A077ZKM6_TRITR | 15 | Nematoda       | Enoplea             | Trichuris trichiura                 |
| tr A0A074W1C1 A0A074W1C1_9NEIS | 3  | Proteobacteria | Betaproteobacteria  | Snodgrassella alvi                  |
| tr V9HKU2 V9HKU2_9NEIS         | 3  | Proteobacteria | Betaproteobacteria  | Simonsiella muelleri                |
| tr Q0EYY4 Q0EYY4_9PROT         | 3  | Proteobacteria | Zetaproteobacteria  | Mariprofundus ferrooxydans          |
| tr G8QKZ3 G8QKZ3_AZOSU         | 3  | Proteobacteria | Betaproteobacteria  | Azospira oryzae                     |
| tr I3BPC0 I3BPC0_9GAMM         | 3  | Proteobacteria | Gammaproteobacteria | Thiothrix nivea                     |
| tr C8NBJ5 C8NBJ5_9GAMM         | 3  | Proteobacteria | Gammaproteobacteria | Cardiobacterium hominis             |
| tr F5RGX9 F5RGX9_METUF         | 3  | Proteobacteria | Betaproteobacteria  | Methyloversatilis universalis       |
| tr A0A0C1EHH8 A0A0C1EHH8_9NEIS | 3  | Proteobacteria | Betaproteobacteria  | Chromobacterium piscinae            |
| tr U1KL45 U1KL45_9GAMM         | 3  | Proteobacteria | Gammaproteobacteria | Pseudoalteromonas rubra             |
| tr H8YXD3 H8YXD3_9GAMM         | 3  | Proteobacteria | Gammaproteobacteria | Thiorhodovibrio sp. 970             |
| tr Q60BV2 Q60BV2_METCA         | 3  | Proteobacteria | Gammaproteobacteria | Methylococcus capsulatus            |
| tr A0A0C2BZI7 A0A0C2BZI7_9BURK | 3  | Proteobacteria | Betaproteobacteria  | Burkholderia sp. MR1                |
| tr V5C6C1 V5C6C1_9GAMM         | 3  | Proteobacteria | Gammaproteobacteria | Methyloglobulus morosus             |
| tr W0TPY7 W0TPY7_9GAMM         | 3  | Proteobacteria | Gammaproteobacteria | Thiolapillus brandeum               |
| tr K6ZJ07 K6ZJ07_9ALTE         | 3  | Proteobacteria | Gammaproteobacteria | Glaciecola pallidula                |

|                                |   |                |                       |                                     |
|--------------------------------|---|----------------|-----------------------|-------------------------------------|
| tr H8FSC4 H8FSC4_PHAMO         | 3 | Proteobacteria | Alphaproteobacteria   | Phaeospirillum molischianum         |
| tr A0A0A0XK37 A0A0A0XK37_BORPT | 3 | Proteobacteria | Betaproteobacteria    | Bordetella pertussis                |
| tr A0A074JU64 A0A074JU64_9PROT | 3 | Proteobacteria | Alphaproteobacteria   | Thalassospira permensis             |
| tr C7LVB3 C7LVB3_DESBD         | 3 | Proteobacteria | Deltaproteobacteria   | Desulfomicrobium baculatum          |
| tr A0A085VDL2 A0A085VDL2_PSESX | 3 | Proteobacteria | Gammaproteobacteria   | Pseudomonas syringae                |
| tr A4END7 A4END7_9RHOB         | 3 | Proteobacteria | Alphaproteobacteria   | Roseobacter sp. CCS2                |
| tr F6G519 F6G519_RALS8         | 3 | Proteobacteria | Betaproteobacteria    | Ralstonia solanacearum              |
| tr A0A0A2NAS5 A0A0A2NAS5_ALCFA | 3 | Proteobacteria | Betaproteobacteria    | Alcaligenes faecalis                |
| tr E7RVG0 E7RVG0_9BURK         | 3 | Proteobacteria | Betaproteobacteria    | Lautropia mirabilis                 |
| tr A2SBR3 A2SBR3_METPP         | 3 | Proteobacteria | Betaproteobacteria    | Methylibium petroleiphilum          |
| tr W4LZ37 W4LZ37_9DELT         | 3 | Proteobacteria | Deltaproteobacteria   | Candidatus Entotheonella sp. TSY1   |
| tr D3P1L3 D3P1L3_AZOS1         | 3 | Proteobacteria | Alphaproteobacteria   | Azospirillum lipoferum              |
| tr L0GTT0 L0GTT0_9GAMM         | 3 | Proteobacteria | Gammaproteobacteria   | Thioflaviccoccus mobilis            |
| tr W0P9Z5 W0P9Z5_9BURK         | 3 | Proteobacteria | Betaproteobacteria    | Advenella mimigardefordensis        |
| tr A0A011MTG9 A0A011MTG9_9PROT | 3 | Proteobacteria | Betaproteobacteria    | Candidatus Accumulibacter sp. SK-12 |
| tr W8X4D4 W8X4D4_CASDE         | 3 | Proteobacteria | Betaproteobacteria    | Castellaniella defragrans           |
| tr E6X0T4 E6X0T4_NITSE         | 3 | Proteobacteria | Epsilonproteobacteria | Nitratifactor salsuginis            |
| tr H5WFA8 H5WFA8_RALSL         | 3 | Proteobacteria | Betaproteobacteria    | Ralstonia solanacearum              |
| tr N9J529 N9J529_ACIBA         | 3 | Proteobacteria | Gammaproteobacteria   | Acinetobacter baumannii             |
| tr E8WLI1 E8WLI1_GEOS8         | 3 | Proteobacteria | Deltaproteobacteria   | Geobacter sp. M18                   |
| tr I4W5L9 I4W5L9_9GAMM         | 3 | Proteobacteria | Gammaproteobacteria   | Rhodanobacter spathiphylli          |
| tr H8Z2C9 H8Z2C9_9GAMM         | 3 | Proteobacteria | Gammaproteobacteria   | Thiorhodovibrio sp. 970             |
| tr A5EVN5 A5EVN5_DICNV         | 3 | Proteobacteria | Gammaproteobacteria   | Dichelobacter nodosus               |
| tr U6ZHU6 U6ZHU6_9ENTR         | 3 | Proteobacteria | Gammaproteobacteria   | Dickeya solani                      |
| tr N6VSY4 N6VSY4_9ALTE         | 3 | Proteobacteria | Gammaproteobacteria   | Marinobacter nanhaiticus            |
| tr I7ZD67 I7ZD67_9GAMM         | 3 | Proteobacteria | Gammaproteobacteria   | Hydrocarboniphaga effusa            |
| tr D5RJN2 D5RJN2_9PROT         | 3 | Proteobacteria | Alphaproteobacteria   | Roseomonas cervicalis               |

|                                |   |                |                       |                                      |
|--------------------------------|---|----------------|-----------------------|--------------------------------------|
| tr S9QUJ4 S9QUJ4_9RHOB         | 3 | Proteobacteria | Alphaproteobacteria   | Salipiger mucosus                    |
| tr K5YNK1 K5YNK1_9PROT         | 3 | Proteobacteria | Alphaproteobacteria   | Acidocella sp. MX-AZ02               |
| tr W6IEP2 W6IEP2_9PROT         | 3 | Proteobacteria | Alphaproteobacteria   | Granulibacter bethesdensis           |
| tr K2HDV7 K2HDV7_9RHOB         | 3 | Proteobacteria | Alphaproteobacteria   | Oceaniovalibus guishaninsula         |
| tr E8LJ51 E8LJ51_9GAMM         | 3 | Proteobacteria | Gammaproteobacteria   | Succinatimonas hippei                |
| tr A3VJY1 A3VJY1_9RHOB         | 3 | Proteobacteria | Alphaproteobacteria   | Maritimibacter alkaliphilus          |
| tr A0A0A1HRZ9 A0A0A1HRZ9_9PSED | 3 | Proteobacteria | Gammaproteobacteria   | Pseudomonas sp. SHC52                |
| tr F1YR40 F1YR40_9PROT         | 3 | Proteobacteria | Alphaproteobacteria   | Acetobacter pomorum                  |
| tr E0XV80 E0XV80_9RHOB         | 3 | Proteobacteria | Alphaproteobacteria   | uncultured Rhodobacterales bacterium |
| tr A0A0A0HMQ5 A0A0A0HMQ5_9RHOB | 3 | Proteobacteria | Alphaproteobacteria   | Roseovarius mucosus                  |
| tr A4SZ70 A4SZ70_POLSQ         | 3 | Proteobacteria | Betaproteobacteria    | Polynucleobacter necessarius         |
| tr A0A095DJU8 A0A095DJU8_BURCE | 3 | Proteobacteria | Betaproteobacteria    | Burkholderia cepacia                 |
| tr I4N3T3 I4N3T3_9PSED         | 3 | Proteobacteria | Gammaproteobacteria   | Pseudomonas sp. M47T1                |
| tr C7DF26 C7DF26_9RHOB         | 3 | Proteobacteria | Alphaproteobacteria   | Thalassobium sp. R2A62               |
| tr E3F4J9 E3F4J9_KETVY         | 3 | Proteobacteria | Alphaproteobacteria   | Ketogulonicigenium vulgare           |
| tr B5WKB9 B5WKB9_9BURK         | 3 | Proteobacteria | Betaproteobacteria    | Burkholderia sp. H160                |
| tr W4HJ72 W4HJ72_9RHOB         | 3 | Proteobacteria | Alphaproteobacteria   | Roseivivax atlanticus                |
| tr Q5LU11 Q5LU11_RUEPO         | 3 | Proteobacteria | Alphaproteobacteria   | Ruegeria pomeroyi                    |
| tr S9R3A0 S9R3A0_9RHOB         | 3 | Proteobacteria | Alphaproteobacteria   | Rubellimicrobium thermophilum        |
| tr Q2CEX1 Q2CEX1_OCEGH         | 3 | Proteobacteria | Alphaproteobacteria   | Oceanicola granulosus                |
| tr A0A0A0EJW2 A0A0A0EJW2_9RHOB | 3 | Proteobacteria | Alphaproteobacteria   | Oceanicola sp. 22II-S11g             |
| tr A1B5I5 A1B5I5_PARDP         | 3 | Proteobacteria | Alphaproteobacteria   | Paracoccus denitrificans             |
| tr A6Q8Y6 A6Q8Y6_SULNB         | 3 | Proteobacteria | Epsilonproteobacteria | Sulfurovum sp. NBC37-1               |
| tr R5EUI6 R5EUI6_9GAMM         | 3 | Proteobacteria | Gammaproteobacteria   | Succinatimonas sp. CAG:777           |
| tr E0MTJ0 E0MTJ0_9RHOB         | 3 | Proteobacteria | Alphaproteobacteria   | Ahrensia sp. R2A130                  |
| tr Q28S24 Q28S24_JANSC         | 3 | Proteobacteria | Alphaproteobacteria   | Jannaschia sp. CCS1                  |
| tr A0A074JYA3 A0A074JYA3_9RHOB | 3 | Proteobacteria | Alphaproteobacteria   | Thioclava pacifica                   |

|                                |    |                 |                       |                                   |
|--------------------------------|----|-----------------|-----------------------|-----------------------------------|
| tr I2JLN1 I2JLN1_9GAMM         | 5  | Proteobacteria  | Gammaproteobacteria   | gamma proteobacterium BDW918      |
| tr B1ZMG9 B1ZMG9_OPITP         | 6  | Verrucomicrobia | Opitutae              | Opitutus terrae                   |
| tr A3SUA2 A3SUA2_9RHOB         | 3  | Proteobacteria  | Alphaproteobacteria   | Sulfitobacter sp. NAS-14.1        |
| tr A0A086YBP6 A0A086YBP6_9RHOB | 3  | Proteobacteria  | Alphaproteobacteria   | Haematobacter massiliensis        |
| tr A0A017HC32 A0A017HC32_9RHOB | 3  | Proteobacteria  | Alphaproteobacteria   | Loktanella hongkongensis          |
| tr I6AE33 I6AE33_BURTH         | 3  | Proteobacteria  | Betaproteobacteria    | Burkholderia thailandensis        |
| tr A0A017HNY4 A0A017HNY4_9RHOB | 13 | Proteobacteria  | Alphaproteobacteria   | Rubellimicrobium mesophilum       |
| tr A0A0C2VS99 A0A0C2VS99_9PROT | 3  | Proteobacteria  | Epsilonproteobacteria | Sulfurovum sp. PC08-66            |
| tr A0A081G1V5 A0A081G1V5_9ALTE | 4  | Proteobacteria  | Gammaproteobacteria   | Marinobacterium sp. AK27          |
| tr R9PQD7 R9PQD7_AGAAL         | 4  | Proteobacteria  | Gammaproteobacteria   | Agarivorans albus                 |
| tr Q12NH6 Q12NH6_SHEDO         | 4  | Proteobacteria  | Gammaproteobacteria   | Shewanella denitrificans          |
| tr W9VQN3 W9VQN3_9GAMM         | 9  | Proteobacteria  | Gammaproteobacteria   | Nitrincola sp. AK23               |
| tr E1SSP2 E1SSP2_FERBD         | 4  | Proteobacteria  | Gammaproteobacteria   | Ferrimonas balearica              |
| tr B5JKB5 B5JKB5_9BACT         | 6  | Verrucomicrobia | Verrucomicrobiae      | Verrucomicrobiae bacterium DG1235 |
| tr F9ZUH5 F9ZUH5_ACICS         | 3  | Proteobacteria  | Gammaproteobacteria   | Acidithiobacillus caldus          |
| tr A0A094K1R7 A0A094K1R7_9GAMM | 4  | Proteobacteria  | Gammaproteobacteria   | Shewanella sp. YQH10              |
| tr A0A0C2YWZ5 A0A0C2YWZ5_9PROT | 3  | Proteobacteria  | Epsilonproteobacteria | Sulfurovum sp. AS07-7             |
| tr A0A091ADE0 A0A091ADE0_AERSA | 4  | Proteobacteria  | Gammaproteobacteria   | Aeromonas salmonicida             |
| tr A0A0C2UYM8 A0A0C2UYM8_9PROT | 3  | Proteobacteria  | Epsilonproteobacteria | Sulfurovum sp. FS06-10            |
| tr F7S7F1 F7S7F1_9PROT         | 3  | Proteobacteria  | Alphaproteobacteria   | Acidiphilium sp. PM               |
| tr Q0VLU5 Q0VLU5_ALCBS         | 6  | Proteobacteria  | Gammaproteobacteria   | Alcanivorax borkumensis           |
| tr M1PHR4 M1PHR4_DESSD         | 8  | Proteobacteria  | Deltaproteobacteria   | Desulfocapsa sulfexigens          |
| tr D1P4W6 D1P4W6_9ENTR         | 5  | Proteobacteria  | Gammaproteobacteria   | Providencia rustigianii           |
| tr Q7MKY5 Q7MKY5_VIBVY         | 4  | Proteobacteria  | Gammaproteobacteria   | Vibrio vulnificus                 |
| tr Q65UD6 Q65UD6_MANSNM        | 4  | Proteobacteria  | Gammaproteobacteria   | [Mannheimia] succiniciproducens   |
| tr R1IEJ1 R1IEJ1_9GAMM         | 4  | Proteobacteria  | Gammaproteobacteria   | Grimontia indica                  |
| tr A1SWU9 A1SWU9_PSYIN         | 4  | Proteobacteria  | Gammaproteobacteria   | Psychromonas ingrahamii           |



|                                |    |                 |                       |                                      |
|--------------------------------|----|-----------------|-----------------------|--------------------------------------|
| tr A0A099L1N4 A0A099L1N4_9GAMM | 11 | Proteobacteria  | Gammaproteobacteria   | Thalassotalea sp. ND16A              |
| tr L6NP03 L6NP03_SALEN         | 19 | Proteobacteria  | Gammaproteobacteria   | Salmonella enterica                  |
| tr Q6AQF6 Q6AQF6_DESPS         | 5  | Proteobacteria  | Deltaproteobacteria   | Desulfotalea psychrophila            |
| tr E1VMF2 E1VMF2_9GAMM         | 5  | Proteobacteria  | Gammaproteobacteria   | gamma proteobacterium HdN1           |
| tr M9YIV7 M9YIV7_AZOVI         | 5  | Proteobacteria  | Gammaproteobacteria   | Azotobacter vinelandii               |
| tr A0A081NCZ7 A0A081NCZ7_9GAMM | 5  | Proteobacteria  | Gammaproteobacteria   | Endozoicomonas numazuensis           |
| tr A0A0A2VIN0 A0A0A2VIN0_BEABA | 20 | Ascomycota      | Sordariomycetes       | Beauveria bassiana                   |
| tr K8BKY4 K8BKY4_9ENTR         | 30 | Proteobacteria  | Gammaproteobacteria   | Cronobacter turicensis               |
| tr T0CD20 T0CD20_9DELT         | 8  | Proteobacteria  | Deltaproteobacteria   | Bacteriovorax sp. BAL6_X             |
| tr A0A0A2I518 A0A0A2I518_9DELT | 4  | Proteobacteria  | Deltaproteobacteria   | Desulfobulbus sp. Tol-SR             |
| tr K5YSZ8 K5YSZ8_9PROT         | 3  | Proteobacteria  | Alphaproteobacteria   | Acidocella sp. MX-AZ02               |
| tr E8RBT1 E8RBT1_DESPD         | 4  | Proteobacteria  | Deltaproteobacteria   | Desulfobulbus propionicus            |
| tr A6FIP2 A6FIP2_9GAMM         | 4  | Proteobacteria  | Gammaproteobacteria   | Moritella sp. PE36                   |
| tr D4H238 D4H238_DENA2         | 11 | Deferribacteres | Deferribacteres       | Denitrovibrio acetiphilus            |
| tr A6DBM5 A6DBM5_9PROT         | 3  | Proteobacteria  | Epsilonproteobacteria | Caminibacter mediatlanticus          |
| tr Q6MNT4 Q6MNT4_BDEBA         | 6  | Proteobacteria  | Deltaproteobacteria   | Bdellovibrio bacteriovorus           |
| tr M4V5W8 M4V5W8_9DELT         | 6  | Proteobacteria  | Deltaproteobacteria   | Bdellovibrio exovorus                |
| tr Q48A65 Q48A65_COLP3         | 11 | Proteobacteria  | Gammaproteobacteria   | Colwellia psychrerythraea            |
| tr A6DM96 A6DM96_9BACT         | 4  | Lentisphaerae   | Lentisphaeria         | Lentisphaera araneosa                |
| tr K2K470 K2K470_9GAMM         | 5  | Proteobacteria  | Gammaproteobacteria   | Gallaecimonas xiamenensis            |
| tr M5TMN6 M5TMN6_9PLAN         | 6  | Planctomycetes  | Planctomycetia        | Rhodopirellula sp. SWK7              |
| tr M5RZ87 M5RZ87_9PLAN         | 6  | Planctomycetes  | Planctomycetia        | Rhodopirellula maiorica              |
| tr E8R5N3 E8R5N3_ISOPI         | 16 | Planctomycetes  | Planctomycetia        | Isosphaera pallida                   |
| tr V4KT63 V4KT63_9DELT         | 4  | Proteobacteria  | Deltaproteobacteria   | uncultured Desulfofustis sp. PB-SRB1 |
| tr W0Z5H5 W0Z5H5_PSEAI         | 25 | Proteobacteria  | Gammaproteobacteria   | Pseudomonas aeruginosa               |
| tr G2HXQ5 G2HXQ5_9PROT         | 4  | Proteobacteria  | Epsilonproteobacteria | Arcobacter sp. L                     |
| tr K1YAB1 K1YAB1_9BACT         | 3  |                 |                       | uncultured bacterium                 |

|                                |    |                |                     |                                          |
|--------------------------------|----|----------------|---------------------|------------------------------------------|
| tr I3CHA5 I3CHA5_9GAMM         | 6  | Proteobacteria | Gammaproteobacteria | Beggiatoa alba                           |
| tr I4WAE0 I4WAE0_9GAMM         | 1  | Proteobacteria | Gammaproteobacteria | Rhodanobacter sp. 115                    |
| tr E5Y3N4 E5Y3N4_BILWA         | 1  | Proteobacteria | Deltaproteobacteria | Bilophila wadsworthia                    |
| tr U2ZN81 U2ZN81_PSEAC         | 1  | Proteobacteria | Gammaproteobacteria | Pseudomonas alcaligenes                  |
| tr X1WKZ8 X1WKZ8_ACYPI         | 33 | Arthropoda     | Insecta             | Acyrtosiphon pisum                       |
| tr A0A0B8NYA0 A0A0B8NYA0_9VIBR | 6  | Proteobacteria | Gammaproteobacteria | Vibrio sp. JCM 19231                     |
| tr W7DYQ2 W7DYQ2_9PROT         | 1  | Proteobacteria | Alphaproteobacteria | Commensalibacter sp. MX01                |
| tr A0A090RQ91 A0A090RQ91_9VIBR | 6  | Proteobacteria | Gammaproteobacteria | Vibrio sp. C7                            |
| tr R5QLU3 R5QLU3_9PROT         | 1  | Proteobacteria | Alphaproteobacteria | Acetobacter sp. CAG:977                  |
| tr T2G944 T2G944_DESGI         | 1  | Proteobacteria | Deltaproteobacteria | Desulfovibrio gigas                      |
| tr A0A059KS25 A0A059KS25_9BURK | 1  | Proteobacteria | Betaproteobacteria  | Sphaerotilus natans                      |
| tr D8F981 D8F981_9DELT         | 1  | Proteobacteria | Deltaproteobacteria | delta proteobacterium NaphS2             |
| tr A0A0A7XF72 A0A0A7XF72_ACIBA | 1  | Proteobacteria | Gammaproteobacteria | Acinetobacter baumannii                  |
| tr A0A0B0HD74 A0A0B0HD74_SOVGS | 1  | Proteobacteria | Gammaproteobacteria | Solemya velum gill symbiont              |
| tr R5EIQ1 R5EIQ1_9GAMM         | 1  | Proteobacteria | Gammaproteobacteria | Succinatimonas sp. CAG:777               |
| tr E5APT9 E5APT9_BURRH         | 1  | Proteobacteria | Betaproteobacteria  | Burkholderia rhizoxinica                 |
| tr Y0KET7 Y0KET7_9PROT         | 1  | Proteobacteria | Betaproteobacteria  | Methylophilaceae bacterium 11            |
| tr K2BJ74 K2BJ74_9BACT         | 1  |                |                     | uncultured bacterium                     |
| tr A0A084IL35 A0A084IL35_9GAMM | 1  | Proteobacteria | Gammaproteobacteria | Salinisphaera hydrothermalis             |
| tr Q0A6H4 Q0A6H4_ALKEH         | 1  | Proteobacteria | Gammaproteobacteria | Alkalilimnicola ehrlichii                |
| tr M1LXJ0 M1LXJ0_9PROT         | 1  | Proteobacteria | Betaproteobacteria  | Candidatus Kinetoplastibacterium galatii |
| tr A0A077ZFB4 A0A077ZFB4_TRITR | 26 | Nematoda       | Enoplea             | Trichuris trichiura                      |
| tr L0DYZ8 L0DYZ8_THIND         | 1  | Proteobacteria | Gammaproteobacteria | Thioalkalivibrio nitratireducens         |
| tr A0A089WLJ1 A0A089WLJ1_9PSED | 1  | Proteobacteria | Gammaproteobacteria | Pseudomonas cremoricolorata              |
| tr K2BX90 K2BX90_9BACT         | 1  |                |                     | uncultured bacterium                     |
| tr S0G4N9 S0G4N9_9DELT         | 1  | Proteobacteria | Deltaproteobacteria | Desulfotignum phosphitoxidans            |
| tr Q6AKW0 Q6AKW0_DESPS         | 1  | Proteobacteria | Deltaproteobacteria | Desulfotalea psychrophila                |

|                                |   |                       |                       |                                          |
|--------------------------------|---|-----------------------|-----------------------|------------------------------------------|
| tr A0A090IGN5 A0A090IGN5_9GAMM | 1 | Proteobacteria        | Gammaproteobacteria   | Moritella viscosa                        |
| tr Q1K499 Q1K499_DESAC         | 1 | Proteobacteria        | Deltaproteobacteria   | Desulfuromonas acetoxidans               |
| tr I4B9F0 I4B9F0_TURPD         | 1 | Spirochaetes          | Spirochaetia          | Turneriella parva                        |
| tr C7LQ95 C7LQ95_DESBD         | 1 | Proteobacteria        | Deltaproteobacteria   | Desulfomicrobium baculatum               |
| tr A0LFA1 A0LFA1_SYNFM         | 1 | Proteobacteria        | Deltaproteobacteria   | Syntrophobacter fumaroxidans             |
| tr E8RF78 E8RF78_DESPD         | 1 | Proteobacteria        | Deltaproteobacteria   | Desulfobulbus propionicus                |
| tr L8XXI9 L8XXI9_9GAMM         | 1 | Proteobacteria        | Gammaproteobacteria   | Wohlfahrtimonas chitiniclastica          |
| tr B5JEH5 B5JEH5_9BACT         | 1 | Verrucomicrobia       | Verrucomicrobiae      | Verrucomicrobiae bacterium DG1235        |
| tr Q2LQ52 Q2LQ52_SYNAS         | 1 | Proteobacteria        | Deltaproteobacteria   | Syntrophus aciditrophicus                |
| tr Q1Q2A0 Q1Q2A0_9BACT         | 1 | Planctomycetes        | Planctomycetia        | Candidatus Kuenenia stuttgartiensis      |
| tr F2NCT0 F2NCT0_DESAR         | 1 | Proteobacteria        | Deltaproteobacteria   | Desulfobacca acetoxidans                 |
| tr Q07WT5 Q07WT5_SHEFN         | 1 | Proteobacteria        | Gammaproteobacteria   | Shewanella frigidimarina                 |
| tr A0A059ZBY4 A0A059ZBY4_9GAMM | 1 | Proteobacteria        | Gammaproteobacteria   | Acidithiobacillus caldus                 |
| tr A0LFH2 A0LFH2_SYNFM         | 1 | Proteobacteria        | Deltaproteobacteria   | Syntrophobacter fumaroxidans             |
| tr Q0F1F6 Q0F1F6_9PROT         | 1 | Proteobacteria        | Zetaproteobacteria    | Mariprofundus ferrooxydans               |
| tr A0A0A6R484 A0A0A6R484_9GAMM | 1 | Proteobacteria        | Gammaproteobacteria   | Methylomonas denitrificans               |
| tr I6ANI7 I6ANI7_9BACT         | 1 | Verrucomicrobia       | Opitutae              | Opitutaceae bacterium TAV1               |
| tr K7YS43 K7YS43_9PROT         | 1 | Proteobacteria        | Alphaproteobacteria   | Candidatus Endolissoclinum faulkneri     |
| tr K2BPX9 K2BPX9_9BACT         | 1 |                       |                       | uncultured bacterium                     |
| tr G2DCT6 G2DCT6_9GAMM         | 1 | Proteobacteria        | Gammaproteobacteria   | endosymbiont of Riftia pachyptila        |
| tr A0A075WT33 A0A075WT33_9BACT | 1 | Thermodesulfobacteria | Thermodesulfobacteria | Thermodesulfobacterium commune           |
| tr A0A077AZG9 A0A077AZG9_9RICK | 1 | Proteobacteria        | Alphaproteobacteria   | Candidatus Paracaedibacter acanthamoebae |
| tr A0A090ANW3 A0A090ANW3_9GAMM | 1 | Proteobacteria        | Gammaproteobacteria   | Thioploca ingrca                         |
| tr K5YWE0 K5YWE0_9PROT         | 1 | Proteobacteria        | Alphaproteobacteria   | Acidocella sp. MX-AZ02                   |
| tr D6STH6 D6STH6_9DELTA        | 1 | Proteobacteria        | Deltaproteobacteria   | Desulfonatronospira thiodismutans        |
| tr I7ZC47 I7ZC47_9GAMM         | 1 | Proteobacteria        | Gammaproteobacteria   | Hydrocarboniphaga effusa                 |
| tr F8A8S9 F8A8S9_THEID         | 1 | Thermodesulfobacteria | Thermodesulfobacteria | Thermodesulfatator indicus               |

|                                |   |                |                     |                                                  |
|--------------------------------|---|----------------|---------------------|--------------------------------------------------|
| tr A0A077FLA7 A0A077FLA7_9RICK | 1 | Proteobacteria | Alphaproteobacteria | Rickettsiales bacterium Ac37b                    |
| tr A0A0B8UFY6 A0A0B8UFY6_PISSA | 1 | Proteobacteria | Gammaproteobacteria | Piscirickettsia salmonis                         |
| tr A8EXT9 A8EXT9_RICCK         | 1 | Proteobacteria | Alphaproteobacteria | Rickettsia canadensis                            |
| tr W0JKP3 W0JKP3_DESAE         | 1 | Proteobacteria | Deltaproteobacteria | Desulfurella acetivorans                         |
| tr C8ND21 C8ND21_9GAMM         | 1 | Proteobacteria | Gammaproteobacteria | Cardiobacterium hominis                          |
| tr A5EYC2 A5EYC2_DICNV         | 6 | Proteobacteria | Gammaproteobacteria | Dichelobacter nodosus                            |
| tr M1LLF7 M1LLF7_9PROT         | 1 | Proteobacteria | Betaproteobacteria  | Candidatus Kinetoplastibacterium desouzaii       |
| tr I3TX61 I3TX61_TISMK         | 1 | Proteobacteria | Alphaproteobacteria | Tistrella mobilis                                |
| tr Q2A4R8 Q2A4R8_FRATH         | 1 | Proteobacteria | Gammaproteobacteria | Francisella tularensis                           |
| tr H8L3U9 H8L3U9_FRAAD         | 6 | Proteobacteria | Gammaproteobacteria | Frateuria aurantia                               |
| tr K2J1F9 K2J1F9_9PROT         | 1 | Proteobacteria | Alphaproteobacteria | Oceanibaculum indicum                            |
| tr D5QBK8 D5QBK8_KOMHA         | 1 | Proteobacteria | Alphaproteobacteria | Komagataeibacter hansenii                        |
| tr A0A0A8F5E9 A0A0A8F5E9_NEIME | 1 | Proteobacteria | Betaproteobacteria  | Neisseria meningitidis                           |
| tr D5MK82 D5MK82_9BACT         | 1 |                |                     | Candidatus Methylospirillum oxyfera              |
| tr W2V2P6 W2V2P6_9RICK         | 1 | Proteobacteria | Alphaproteobacteria | Candidatus Xenolissoclinum pacificiensis         |
| tr Q0FAL5 Q0FAL5_9RHOB         | 1 | Proteobacteria | Alphaproteobacteria | Rhodobacterales bacterium HTCC2255               |
| tr Q2LS06 Q2LS06_SYNAS         | 1 | Proteobacteria | Deltaproteobacteria | Syntrophus aciditrophicus                        |
| tr K2E4C8 K2E4C8_9BACT         | 1 |                |                     | uncultured bacterium                             |
| tr A3UD49 A3UD49_9RHOB         | 1 | Proteobacteria | Alphaproteobacteria | Oceanicaulis sp. HTCC2633                        |
| tr A0A0C1QJC1 A0A0C1QJC1_9RICK | 1 | Proteobacteria | Alphaproteobacteria | endosymbiont of Acanthamoeba sp. UWC36           |
| tr B3CMK7 B3CMK7_WOLPP         | 1 | Proteobacteria | Alphaproteobacteria | Wolbachia endosymbiont of Culex quinquefasciatus |
| tr W0DXE2 W0DXE2_9GAMM         | 1 | Proteobacteria | Gammaproteobacteria | Thioalkalimicrobium aerophilum                   |
| tr A0A061QFC6 A0A061QFC6_9PROT | 1 | Proteobacteria | Alphaproteobacteria | alpha proteobacterium Q-1                        |
| tr A0A086YDD8 A0A086YDD8_9RHOB | 1 | Proteobacteria | Alphaproteobacteria | Haematobacter missouriensis                      |
| tr T0ZPG4 T0ZPG4_9ZZZZ         | 1 |                |                     | mine drainage metagenome                         |
| tr S5YB63 S5YB63_PARAH         | 1 | Proteobacteria | Alphaproteobacteria | Paracoccus aminophilus                           |
| tr R5QNA7 R5QNA7_9PROT         | 1 | Proteobacteria | Alphaproteobacteria | Acetobacter sp. CAG:977                          |

|                                |   |                 |                     |                                      |
|--------------------------------|---|-----------------|---------------------|--------------------------------------|
| tr S9QYP4 S9QYP4_9RHOB         | 1 | Proteobacteria  | Alphaproteobacteria | Rubellimicrobium thermophilum        |
| tr M4VEA5 M4VEA5_9DELT         | 1 | Proteobacteria  | Deltaproteobacteria | Bdellovibrio exovorus                |
| tr C8X0M3 C8X0M3_DESRD         | 1 | Proteobacteria  | Deltaproteobacteria | Desulfohalobium retbaense            |
| tr G9ZVS6 G9ZVS6_9PROT         | 1 | Proteobacteria  | Alphaproteobacteria | Acetobacteraceae bacterium AT-5844   |
| tr G2I4S7 G2I4S7_KOMMN         | 1 | Proteobacteria  | Alphaproteobacteria | Komagataeibacter medellinensis       |
| tr A0A077C2N2 A0A077C2N2_9RICK | 1 | Proteobacteria  | Alphaproteobacteria | Candidatus Caedibacter acanthamoebae |
| tr D1AD49 D1AD49_THECD         | 2 | Actinobacteria  | Actinobacteria      | Thermomonospora curvata              |
| tr D6KSC1 D6KSC1_9FIRM         | 1 | Firmicutes      | Negativicutes       | Veillonella sp. 6_1_27               |
| tr Q5H658 Q5H658_XANOR         | 1 | Proteobacteria  | Gammaproteobacteria | Xanthomonas oryzae                   |
| tr R5R5J3 R5R5J3_9PROT         | 1 | Proteobacteria  |                     | Proteobacteria bacterium CAG:495     |
| tr B9KHI7 B9KHI7_ANAMF         | 1 | Proteobacteria  | Alphaproteobacteria | Anaplasma marginale                  |
| tr Q2W3M7 Q2W3M7_MAGSA         | 1 | Proteobacteria  | Alphaproteobacteria | Magnetospirillum magneticum          |
| tr A0A078L431 A0A078L431_9GAMM | 1 | Proteobacteria  | Gammaproteobacteria | Legionella massiliensis              |
| tr H8FPR4 H8FPR4_PHAMO         | 1 | Proteobacteria  | Alphaproteobacteria | Phaeospirillum molischianum          |
| tr B5YIL8 B5YIL8_THEYD         | 1 | Nitrospirae     | Nitrospira          | Thermodesulfovibrio yellowstonii     |
| tr A5CEP7 A5CEP7_ORITB         | 1 | Proteobacteria  | Alphaproteobacteria | Orientia tsutsugamushi               |
| tr O66784 O66784_AQUAE         | 1 | Aquificae       | Aquificae           | Aquifex aeolicus                     |
| tr L8K1H1 L8K1H1_9BACT         | 1 | Bacteroidetes   | Cytophagia          | Fulvivirga imtechensis               |
| tr W9AP53 W9AP53_9MYCO         | 2 | Actinobacteria  | Actinobacteria      | Mycobacterium cosmeticum             |
| tr A0A059G889 A0A059G889_9RHOB | 1 | Proteobacteria  | Alphaproteobacteria | Hyphomonas oceanitis                 |
| tr Q5HC50 Q5HC50_EHRRW         | 1 | Proteobacteria  | Alphaproteobacteria | Ehrlichia ruminantium                |
| tr E1QG67 E1QG67_DESB2         | 1 | Proteobacteria  | Deltaproteobacteria | Desulfarculus baarsii                |
| tr F2NGX9 F2NGX9_DESAR         | 6 | Proteobacteria  | Deltaproteobacteria | Desulfobacca acetoxidans             |
| tr J2FZ00 J2FZ00_9CAUL         | 1 | Proteobacteria  | Alphaproteobacteria | Caulobacter sp. AP07                 |
| tr D3PDB7 D3PDB7_DEFDS         | 1 | Deferribacteres | Deferribacteres     | Deferribacter desulfuricans          |
| tr A0A090VXL3 A0A090VXL3_9FLAO | 1 | Bacteroidetes   | Flavobacteriia      | Jejuia pallidilutea                  |
| tr A8UTJ7 A8UTJ7_9AQUI         | 1 | Aquificae       | Aquificae           | Hydrogenivirga sp. 128-5-R1-1        |

|                                |   |                |                     |                                     |
|--------------------------------|---|----------------|---------------------|-------------------------------------|
| tr X5GWN0 X5GWN0_9RICK         | 1 | Proteobacteria | Alphaproteobacteria | Neorickettsia helminthoeca          |
| tr A0A0A0CYI9 A0A0A0CYI9_9PROT | 1 | Proteobacteria | Alphaproteobacteria | Inquilinus limosus                  |
| tr M4S5I1 M4S5I1_9SPHN         | 1 | Proteobacteria | Alphaproteobacteria | Sphingomonas sp. MM-1               |
| tr D5BSN9 D5BSN9_PUNMI         | 1 | Proteobacteria | Alphaproteobacteria | Candidatus Puniceispirillum marinum |
| tr F9N659 F9N659_9FIRM         | 1 | Firmicutes     | Negativicutes       | Veillonella sp. oral taxon 780      |
| tr F1YQK0 F1YQK0_9PROT         | 1 | Proteobacteria | Alphaproteobacteria | Acetobacter pomorum                 |
| tr W5TFY4 W5TFY4_9NOCA         | 1 | Actinobacteria | Actinobacteria      | Nocardia nova                       |
| tr Q0BRB9 Q0BRB9_GRABC         | 1 | Proteobacteria | Alphaproteobacteria | Granulibacter bethesdensis          |
| tr U2WDD5 U2WDD5_9PROT         | 1 | Proteobacteria | Alphaproteobacteria | alpha proteobacterium RS24          |
| tr G6EZ80 G6EZ80_9PROT         | 1 | Proteobacteria | Alphaproteobacteria | Commensalibacter intestini          |
| tr R5QMG9 R5QMG9_9PROT         | 1 | Proteobacteria |                     | Proteobacteria bacterium CAG:495    |
| tr T0SGM9 T0SGM9_9DELT         | 1 | Proteobacteria | Deltaproteobacteria | Bacteriovorax sp. Seq25_V           |
| tr F4CXJ4 F4CXJ4_PSEUX         | 2 | Actinobacteria | Actinobacteria      | Pseudonocardia dioxanivorans        |
| tr W7JBX5 W7JBX5_9PSEU         | 1 | Actinobacteria | Actinobacteria      | Actinokineospora sp. EG49           |
| tr A0A099DAR3 A0A099DAR3_9ACTO | 2 | Actinobacteria | Actinobacteria      | Actinopolyspora erythraea           |
| tr A0A0C1P3T8 A0A0C1P3T8_9PSEU | 2 | Actinobacteria | Actinobacteria      | Prauserella sp. Am3                 |
| tr A0A0B7CJ46 A0A0B7CJ46_9PSEU | 2 | Actinobacteria | Actinobacteria      | Kibdelosporangium sp. MJ126-NF4     |
| tr W7SR07 W7SR07_9PSEU         | 2 | Actinobacteria | Actinobacteria      | Kutzneria sp. 744                   |
| tr J1S703 J1S703_9ACTO         | 2 | Actinobacteria | Actinobacteria      | Streptomyces auratus                |
| tr T2RPW9 T2RPW9_SACER         | 2 | Actinobacteria | Actinobacteria      | Saccharopolyspora erythraea         |
| tr H6RMU8 H6RMU8_BLASD         | 1 | Actinobacteria | Actinobacteria      | Blastococcus saxobsidens            |
| tr A0A0A0J9Q0 A0A0A0J9Q0_9MICO | 1 | Actinobacteria | Actinobacteria      | Knoellia flava                      |
| tr M3TSE7 M3TSE7_9ACTO         | 2 | Actinobacteria | Actinobacteria      | Gordonia paraffinivorans            |
| tr E2PY83 E2PY83_STRC2         | 2 | Actinobacteria | Actinobacteria      | Streptomyces clavuligerus           |
| tr G0FS99 G0FS99_9AMYMS        | 1 | Actinobacteria | Actinobacteria      | Amycolatopsis mediterranei          |
| tr E2SGB0 E2SGB0_9ACTO         | 1 | Actinobacteria | Actinobacteria      | Aeromicrobium marinum               |
| tr R7WR74 R7WR74_9NOCA         | 2 | Actinobacteria | Actinobacteria      | Rhodococcus rhodnii                 |

|                                |   |                |                |                                 |
|--------------------------------|---|----------------|----------------|---------------------------------|
| tr E9V1A1 E9V1A1_9ACTO         | 1 | Actinobacteria | Actinobacteria | Nocardioideae bacterium Broad-1 |
| tr D5UQ84 D5UQ84_TSUPD         | 1 | Actinobacteria | Actinobacteria | Tsukamurella paurometabola      |
| tr A0A076N3Z6 A0A076N3Z6_AMYME | 2 | Actinobacteria | Actinobacteria | Amycolatopsis methanolica       |
| tr F6EHT4 F6EHT4_AMYSD         | 1 | Actinobacteria | Actinobacteria | Amycolicoccus subflavus         |
| tr E4WD60 E4WD60_RHOE1         | 2 | Actinobacteria | Actinobacteria | Rhodococcus equi                |
| tr D3QB64 D3QB64_STANL         | 2 | Actinobacteria | Actinobacteria | Stackebrandtia nassauensis      |
| tr A0A0A1DSY0 A0A0A1DSY0_NOCSI | 1 | Actinobacteria | Actinobacteria | Pimelobacter simplex            |
| tr D1A3A0 D1A3A0_THECD         | 2 | Actinobacteria | Actinobacteria | Thermomonospora curvata         |
| tr A1SKI8 A1SKI8_NOCSJ         | 1 | Actinobacteria | Actinobacteria | Nocardioides sp. JS614          |
| tr E9UWC5 E9UWC5_9ACTO         | 2 | Actinobacteria | Actinobacteria | Nocardioideae bacterium Broad-1 |
| tr E2SEJ7 E2SEJ7_9ACTO         | 1 | Actinobacteria | Actinobacteria | Aeromicrobium marinum           |
| tr L2TT79 L2TT79_9NOCA         | 2 | Actinobacteria | Actinobacteria | Rhodococcus wratislaviensis     |
| tr X8B1E4 X8B1E4_MYCAV         | 2 | Actinobacteria | Actinobacteria | Mycobacterium avium             |
| tr C1BB82 C1BB82_RHOOB         | 2 | Actinobacteria | Actinobacteria | Rhodococcus opacus              |
| tr L7L5Y6 L7L5Y6_9ACTO         | 2 | Actinobacteria | Actinobacteria | Gordonia hirsuta                |
| tr H0RGF1 H0RGF1_9ACTO         | 2 | Actinobacteria | Actinobacteria | Gordonia polyisoprenivorans     |
| tr W8HMK3 W8HMK3_RHOOP         | 1 | Actinobacteria | Actinobacteria | Rhodococcus opacus              |
| tr E2S874 E2S874_9ACTO         | 1 | Actinobacteria | Actinobacteria | Aeromicrobium marinum           |
| tr R7XXX2 R7XXX2_9ACTO         | 1 | Actinobacteria | Actinobacteria | Nocardioides sp. CF8            |
| tr L7LAD3 L7LAD3_9ACTO         | 2 | Actinobacteria | Actinobacteria | Gordonia hirsuta                |
| tr W5WSC8 W5WSC8_9PSEU         | 1 | Actinobacteria | Actinobacteria | Kutzneria albida                |
| tr E6JDS6 E6JDS6_9ACTO         | 1 | Actinobacteria | Actinobacteria | Dietzia cinnamomea              |
| tr G7GSR3 G7GSR3_9ACTO         | 1 | Actinobacteria | Actinobacteria | Gordonia amarae                 |
| tr H5X8G1 H5X8G1_9PSEU         | 2 | Actinobacteria | Actinobacteria | Saccharomonospora marina        |
| tr X7ZXX3 X7ZXX3_MYCXE         | 6 | Actinobacteria | Actinobacteria | Mycobacterium xenopi            |
| tr L7LKU3 L7LKU3_9ACTO         | 1 | Actinobacteria | Actinobacteria | Gordonia sihwensis              |
| tr J4TJB4 J4TJB4_9MYCO         | 1 | Actinobacteria | Actinobacteria | Mycobacterium colombiense       |

|                                |    |                |                |                                    |
|--------------------------------|----|----------------|----------------|------------------------------------|
| tr X7YM24 X7YM24_MYCKA         | 2  | Actinobacteria | Actinobacteria | Mycobacterium kansasii             |
| tr A0A024M5I3 A0A024M5I3_9MYCO | 10 | Actinobacteria | Actinobacteria | Mycobacterium farcinogenes         |
| tr H5X5Q8 H5X5Q8_9PSEU         | 1  | Actinobacteria | Actinobacteria | Saccharomonospora marina           |
| tr E9V0Y9 E9V0Y9_9ACTO         | 1  | Actinobacteria | Actinobacteria | Nocardioideaceae bacterium Broad-1 |
| tr C3JUL6 C3JUL6_RHOER         | 1  | Actinobacteria | Actinobacteria | Rhodococcus erythropolis           |
| tr X8CLF3 X8CLF3_MYCIT         | 12 | Actinobacteria | Actinobacteria | Mycobacterium intracellulare       |
| tr G7GKE4 G7GKE4_9ACTO         | 1  | Actinobacteria | Actinobacteria | Gordonia amarae                    |
| tr G7GUZ7 G7GUZ7_9ACTO         | 1  | Actinobacteria | Actinobacteria | Gordonia amarae                    |
| tr Q5YYPJ0 Q5YYPJ0_NOCSA       | 1  | Actinobacteria | Actinobacteria | Nocardia farcinica                 |
| tr X8DN68 X8DN68_MYCXE         | 6  | Actinobacteria | Actinobacteria | Mycobacterium xenopi               |
| tr A0A0A1DL73 A0A0A1DL73_NOCSI | 1  | Actinobacteria | Actinobacteria | Pimelobacter simplex               |
| tr A0A0B8NG66 A0A0B8NG66_9NOCA | 1  | Actinobacteria | Actinobacteria | Nocardia seriolae                  |
| tr C1A0D9 C1A0D9_RHOE4         | 2  | Actinobacteria | Actinobacteria | Rhodococcus erythropolis           |
| tr A0A098BNV6 A0A098BNV6_9NOCA | 1  | Actinobacteria | Actinobacteria | Rhodococcus ruber                  |
| tr L8DFS3 L8DFS3_9NOCA         | 1  | Actinobacteria | Actinobacteria | Rhodococcus sp. AW25M09            |
| tr E2SCQ8 E2SCQ8_9ACTO         | 2  | Actinobacteria | Actinobacteria | Aeromicrobium marinum              |
| tr D0L6Z6 D0L6Z6_GORB4         | 1  | Actinobacteria | Actinobacteria | Gordonia bronchialis               |
| tr A0A0A1DP83 A0A0A1DP83_NOCSI | 2  | Actinobacteria | Actinobacteria | Pimelobacter simplex               |
| tr A0A049DYL2 A0A049DYL2_MYCAV | 1  | Actinobacteria | Actinobacteria | Mycobacterium avium                |
| tr F5YX50 F5YX50_MYCSD         | 1  | Actinobacteria | Actinobacteria | Mycobacterium sp. JDM601           |
| tr W5TJZ0 W5TJZ0_9NOCA         | 1  | Actinobacteria | Actinobacteria | Nocardia nova                      |
| tr D2B9V9 D2B9V9_STRRD         | 2  | Actinobacteria | Actinobacteria | Streptosporangium roseum           |
| tr V8CVX7 V8CVX7_9ACTO         | 6  | Actinobacteria | Actinobacteria | Williamsia sp. D3                  |
| tr K8XTI5 K8XTI5_RHOOP         | 1  | Actinobacteria | Actinobacteria | Rhodococcus opacus                 |
| tr D1A3I7 D1A3I7_THECD         | 2  | Actinobacteria | Actinobacteria | Thermomonospora curvata            |
| tr H0R663 H0R663_9ACTO         | 1  | Actinobacteria | Actinobacteria | Gordonia effusa                    |
| tr M2VYX2 M2VYX2_9NOCA         | 1  | Actinobacteria | Actinobacteria | Rhodococcus triatomae              |



|                                |   |                |                |                                 |
|--------------------------------|---|----------------|----------------|---------------------------------|
| tr F6EN10 F6EN10_AMYSD         | 1 | Actinobacteria | Actinobacteria | Amycolicoccus subflavus         |
| tr F6EHS4 F6EHS4_AMYSD         | 1 | Actinobacteria | Actinobacteria | Amycolicoccus subflavus         |
| tr D1AD47 D1AD47_THECD         | 2 | Actinobacteria | Actinobacteria | Thermomonospora curvata         |
| tr E9UWP3 E9UWP3_9ACTO         | 1 | Actinobacteria | Actinobacteria | Nocardioideae bacterium Broad-1 |
| tr H5X8G0 H5X8G0_9PSEU         | 1 | Actinobacteria | Actinobacteria | Saccharomonospora marina        |
| tr R4MBA2 R4MBA2_MYCTX         | 1 | Actinobacteria | Actinobacteria | Mycobacterium tuberculosis      |
| tr G7GP50 G7GP50_9ACTO         | 1 | Actinobacteria | Actinobacteria | Gordonia amarae                 |
| tr A0A034UEJ5 A0A034UEJ5_9NOCA | 1 | Actinobacteria | Actinobacteria | Nocardia brasiliensis           |
| tr H0R4X4 H0R4X4_9ACTO         | 1 | Actinobacteria | Actinobacteria | Gordonia effusa                 |
| tr H0QWF9 H0QWF9_9ACTO         | 1 | Actinobacteria | Actinobacteria | Gordonia effusa                 |
| tr L8DEL3 L8DEL3_9NOCA         | 1 | Actinobacteria | Actinobacteria | Rhodococcus sp. AW25M09         |
| tr G4HR53 G4HR53_MYCRH         | 1 | Actinobacteria | Actinobacteria | Mycobacterium rhodesiae         |
| tr H5UKZ3 H5UKZ3_9ACTO         | 1 | Actinobacteria | Actinobacteria | Gordonia terrae                 |
| tr H0QWP1 H0QWP1_9ACTO         | 1 | Actinobacteria | Actinobacteria | Gordonia effusa                 |
| tr G7H7G1 G7H7G1_9ACTO         | 1 | Actinobacteria | Actinobacteria | Gordonia araii                  |
| tr A0A0C1LBJ1 A0A0C1LBJ1_9PSEU | 2 | Actinobacteria | Actinobacteria | Prauserella sp. Am3             |
| tr G7GTT1 G7GTT1_9ACTO         | 1 | Actinobacteria | Actinobacteria | Gordonia amarae                 |
| tr A0A0A1FTG8 A0A0A1FTG8_9MYCO | 1 | Actinobacteria | Actinobacteria | Mycobacterium sp. VKM Ac-1817D  |
| tr J9SEN1 J9SEN1_9ACTO         | 1 | Actinobacteria | Actinobacteria | Gordonia sp. KTR9               |
| tr A0A069JAN8 A0A069JAN8_9NOCA | 2 | Actinobacteria | Actinobacteria | Rhodococcus qingshengii         |
| tr D1A3A1 D1A3A1_THECD         | 1 | Actinobacteria | Actinobacteria | Thermomonospora curvata         |
| tr L7LAG4 L7LAG4_9ACTO         | 1 | Actinobacteria | Actinobacteria | Gordonia hirsuta                |
| tr H5UG93 H5UG93_9ACTO         | 1 | Actinobacteria | Actinobacteria | Gordonia terrae                 |
| tr R4UZM2 R4UZM2_MYCAB         | 1 | Actinobacteria | Actinobacteria | Mycobacterium abscessus         |
| tr Q82B07 Q82B07_STRAW         | 1 | Actinobacteria | Actinobacteria | Streptomyces avermitilis        |
| tr J9RFH6 J9RFH6_9ACTO         | 1 | Actinobacteria | Actinobacteria | Gordonia sp. KTR9               |
| tr H6RCR8 H6RCR8_NOCCG         | 1 | Actinobacteria | Actinobacteria | Nocardia cyriacigeorgica        |

|                                |    |                |                     |                              |
|--------------------------------|----|----------------|---------------------|------------------------------|
| tr M2VAL0 M2VAL0_9NOCA         | 1  | Actinobacteria | Actinobacteria      | Rhodococcus triatomae        |
| tr H6RMV0 H6RMV0_BLASD         | 1  | Actinobacteria | Actinobacteria      | Blastococcus saxobsidens     |
| tr R1IB31 R1IB31_9PSEU         | 1  | Actinobacteria | Actinobacteria      | Amycolatopsis vancoresmycina |
| tr G7GXB3 G7GXB3_9ACTO         | 1  | Actinobacteria | Actinobacteria      | Gordonia araii               |
| tr E2SGB1 E2SGB1_9ACTO         | 1  | Actinobacteria | Actinobacteria      | Aeromicrobium marinum        |
| tr G7GSQ0 G7GSQ0_9ACTO         | 1  | Actinobacteria | Actinobacteria      | Gordonia amarae              |
| tr G7GKE2 G7GKE2_9ACTO         | 1  | Actinobacteria | Actinobacteria      | Gordonia amarae              |
| tr D2B9V8 D2B9V8_STRRD         | 1  | Actinobacteria | Actinobacteria      | Streptosporangium roseum     |
| tr A0A0B8NBL1 A0A0B8NBL1_9NOCA | 1  | Actinobacteria | Actinobacteria      | Nocardia seriolae            |
| tr E5XTR1 E5XTR1_9ACTO         | 6  | Actinobacteria | Actinobacteria      | Segniliparus rugosus         |
| tr R7XWT8 R7XWT8_9ACTO         | 24 | Actinobacteria | Actinobacteria      | Nocardioides sp. CF8         |
| tr F4CXJ2 F4CXJ2_PSEUX         | 1  | Actinobacteria | Actinobacteria      | Pseudonocardia dioxanivorans |
| tr Q5YVH1 Q5YVH1_NOCHA         | 1  | Actinobacteria | Actinobacteria      | Nocardia farcinica           |
| tr D5UP35 D5UP35_TSUPD         | 1  | Actinobacteria | Actinobacteria      | Tsukamurella paurometabola   |
| tr U1ZJL3 U1ZJL3_9BURK         | 1  | Proteobacteria | Betaproteobacteria  | Alcaligenes sp. EGD-AK7      |
| tr A0A031MIE7 A0A031MIE7_9PSED | 1  | Proteobacteria | Gammaproteobacteria | Pseudomonas bauzanensis      |
| tr J6I7B6 J6I7B6_9ENTR         | 1  | Proteobacteria | Gammaproteobacteria | Klebsiella sp. OBRC7         |
| tr N6YC44 N6YC44_9RHOO         | 1  | Proteobacteria | Betaproteobacteria  | Thauera sp. 63               |
| tr Q2Y8L0 Q2Y8L0_NITMU         | 1  | Proteobacteria | Betaproteobacteria  | Nitrospira multiformis       |
| tr A0A0B2DAV4 A0A0B2DAV4_9GAMM | 1  | Proteobacteria | Gammaproteobacteria | Serpens flexibilis           |
| tr H2FYH2 H2FYH2_OCESG         | 1  | Proteobacteria | Gammaproteobacteria | Oceanimonas sp. GK1          |
| tr H8L0A6 H8L0A6_FRAAD         | 1  | Proteobacteria | Gammaproteobacteria | Frateuria aurantia           |
| tr C4LEE8 C4LEE8_TOLAT         | 1  | Proteobacteria | Gammaproteobacteria | Tolumonas auensis            |
| tr W0PAK2 W0PAK2_9BURK         | 1  | Proteobacteria | Betaproteobacteria  | Advenella mimigardefordensis |
| tr T1CD74 T1CD74_9ZZZZ         | 1  |                |                     | mine drainage metagenome     |
| tr T2LCY9 T2LCY9_9GAMM         | 1  | Proteobacteria | Gammaproteobacteria | Halomonas sp. A3H3           |
| tr A0A072N462 A0A072N462_9ALTE | 1  | Proteobacteria | Gammaproteobacteria | Marinobacter sp. AK21        |

|                                |   |                |                     |                                         |
|--------------------------------|---|----------------|---------------------|-----------------------------------------|
| tr G5Q9L4 G5Q9L4_SALMO         | 1 | Proteobacteria | Gammaproteobacteria | Salmonella enterica                     |
| tr U7P997 U7P997_9GAMM         | 1 | Proteobacteria | Gammaproteobacteria | Halomonas sp. PBN3                      |
| tr A0A0A0M9P8 A0A0A0M9P8_9GAMM | 1 | Proteobacteria | Gammaproteobacteria | Lysobacter defluvii                     |
| tr I2B9J8 I2B9J8_SHIBC         | 1 | Proteobacteria | Gammaproteobacteria | Shimwellia blattae                      |
| tr A0A077DC69 A0A077DC69_9BURK | 1 | Proteobacteria | Betaproteobacteria  | Basilea psittacipulmonis                |
| tr A1WY43 A1WY43_HALHL         | 1 | Proteobacteria | Gammaproteobacteria | Halorhodospira halophila                |
| tr V8G7S9 V8G7S9_9BURK         | 1 | Proteobacteria | Betaproteobacteria  | Pelistega sp. HM-7                      |
| tr A0A096BDQ0 A0A096BDQ0_9BURK | 1 | Proteobacteria | Betaproteobacteria  | Oligella urethralis                     |
| tr X5M6E7 X5M6E7_9PROT         | 1 | Proteobacteria | Alphaproteobacteria | Candidatus Phaeomarinobacter ectocarpus |
| tr A7HW40 A7HW40_PARL1         | 1 | Proteobacteria | Alphaproteobacteria | Parvibaculum lavamentivorans            |
| tr A0A081B9S0 A0A081B9S0_9PROT | 1 | Proteobacteria | Alphaproteobacteria | alpha proteobacterium MA2               |
| tr W9H4G6 W9H4G6_9PROT         | 1 | Proteobacteria | Alphaproteobacteria | Skermanella stibiirens                  |
| tr M2TL71 M2TL71_9PROT         | 1 | Proteobacteria | Alphaproteobacteria | alpha proteobacterium JLT2015           |
| tr A0A0C1U256 A0A0C1U256_9CYAN | 1 | Cyanobacteria  |                     | Scytonema millei                        |
| tr A0A069E8D6 A0A069E8D6_9RHOB | 1 | Proteobacteria | Alphaproteobacteria | Hyphomonas adhaerens                    |
| tr B6IT87 B6IT87_RHOCS         | 1 | Proteobacteria | Alphaproteobacteria | Rhodospirillum centenum                 |
| tr G8APJ5 G8APJ5_AZOBR         | 1 | Proteobacteria | Alphaproteobacteria | Azospirillum brasilense                 |
| tr K2DV61 K2DV61_9BACT         | 1 |                |                     | uncultured bacterium                    |
| tr D0CZC8 D0CZC8_9RHOB         | 1 | Proteobacteria | Alphaproteobacteria | Citricella sp. SE45                     |
| tr S7U5S8 S7U5S8_9DELT         | 1 | Proteobacteria | Deltaproteobacteria | Desulfovibrio sp. X2                    |
| tr B8DLS5 B8DLS5_DESVM         | 1 | Proteobacteria | Deltaproteobacteria | Desulfovibrio vulgaris                  |
| tr A0A0B8RE09 A0A0B8RE09_9PROT | 1 | Proteobacteria | Alphaproteobacteria | alpha proteobacterium U9-li             |
| tr A0A061QHA4 A0A061QHA4_9PROT | 1 | Proteobacteria | Alphaproteobacteria | alpha proteobacterium Q-1               |
| tr A0A0A1PX21 A0A0A1PX21_9BACT | 1 |                |                     | bacterium YEK0313                       |
| tr E3I3Y1 E3I3Y1_RHOVT         | 1 | Proteobacteria | Alphaproteobacteria | Rhodomicrobium vanniellii               |
| tr B4RE08 B4RE08_PHEZH         | 1 | Proteobacteria | Alphaproteobacteria | Phenylobacterium zucineum               |
| tr J7Q4T2 J7Q4T2_METSZ         | 1 | Proteobacteria | Alphaproteobacteria | Methylocystis sp. SC2                   |

|                                |   |                |                       |                                      |
|--------------------------------|---|----------------|-----------------------|--------------------------------------|
| tr T0GJ97 T0GJ97_9SPHN         | 1 | Proteobacteria | Alphaproteobacteria   | Sphingobium baderi                   |
| tr I2K9W2 I2K9W2_9PROT         | 1 | Proteobacteria | Epsilonproteobacteria | Sulfurovum sp. AR                    |
| tr Q3J2I1 Q3J2I1_RHOS4         | 1 | Proteobacteria | Alphaproteobacteria   | Rhodobacter sphaeroides              |
| tr D9QGF1 D9QGF1_BRESC         | 1 | Proteobacteria | Alphaproteobacteria   | Brevundimonas subvibrioides          |
| tr A0A0C1IN25 A0A0C1IN25_9RHOB | 1 | Proteobacteria | Alphaproteobacteria   | Ruegeria sp. ANG-R                   |
| tr A0A074MC36 A0A074MC36_ERYLO | 1 | Proteobacteria | Alphaproteobacteria   | Erythrobacter longus                 |
| tr S6B3W9 S6B3W9_9PROT         | 1 | Proteobacteria | Betaproteobacteria    | Sulfuricella denitrificans           |
| tr A0A0A8K3K2 A0A0A8K3K2_9RHIZ | 1 | Proteobacteria | Alphaproteobacteria   | Methyloceanibacter caenitepidi       |
| tr K7T2K7 K7T2K7_9HELI         | 1 | Proteobacteria | Epsilonproteobacteria | Candidatus Sulfuricurvum sp. RIFRC-1 |
| tr T0JP38 T0JP38_9HELI         | 1 | Proteobacteria | Epsilonproteobacteria | Sulfurimonas sp. AST-10              |
| tr M2SE07 M2SE07_9PROT         | 1 | Proteobacteria | Alphaproteobacteria   | alpha proteobacterium JLT2015        |
| tr E0TB69 E0TB69_PARBH         | 1 | Proteobacteria | Alphaproteobacteria   | Parvularcula bermudensis             |
| tr C6XN24 C6XN24_HIRBI         | 1 | Proteobacteria | Alphaproteobacteria   | Hirschia baltica                     |
| tr B1Z830 B1Z830_METPB         | 1 | Proteobacteria | Alphaproteobacteria   | Methylobacterium populi              |
| tr A0A0A0D684 A0A0A0D684_9PROT | 1 | Proteobacteria | Alphaproteobacteria   | Inquilingus limosus                  |
| tr I4YW72 I4YW72_9RHIZ         | 1 | Proteobacteria | Alphaproteobacteria   | Microvirga lotononidis               |
| tr I3TKF0 I3TKF0_TISMK         | 1 | Proteobacteria | Alphaproteobacteria   | Tistrella mobilis                    |
| tr A0A095CYU7 A0A095CYU7_9SPHN | 1 | Proteobacteria | Alphaproteobacteria   | Sphingopyxis sp. LC363               |
| tr A0A087M978 A0A087M978_9PROT | 1 | Proteobacteria | Epsilonproteobacteria | Sulfurospirillum sp. SCADC           |
| tr W0JMI0 W0JMI0_DESAE         | 1 | Proteobacteria | Deltaproteobacteria   | Desulfurella acetivorans             |
| tr B8ET81 B8ET81_METSB         | 1 | Proteobacteria | Alphaproteobacteria   | Methylocella silvestris              |
| tr A0A085EY42 A0A085EY42_9BRAD | 1 | Proteobacteria | Alphaproteobacteria   | Bosea sp. LC85                       |
| tr B6R083 B6R083_9RHOB         | 1 | Proteobacteria | Alphaproteobacteria   | Pseudovibrio sp. JE062               |
| tr D5BVM5 D5BVM5_NITHN         | 1 | Proteobacteria | Gammaproteobacteria   | Nitrosococcus halophilus             |
| tr V4JE12 V4JE12_9DELT         | 1 | Proteobacteria | Deltaproteobacteria   | uncultured Desulfofustis sp. PB-SRB1 |
| tr G2HRZ6 G2HRZ6_9PROT         | 1 | Proteobacteria | Epsilonproteobacteria | Arcobacter sp. L                     |
| tr E8RQ92 E8RQ92_ASTEC         | 1 | Proteobacteria | Alphaproteobacteria   | Asticcacaulis excentricus            |

|                                |   |                |                       |                                           |
|--------------------------------|---|----------------|-----------------------|-------------------------------------------|
| tr U4V650 U4V650_9RHIZ         | 1 | Proteobacteria | Alphaproteobacteria   | Ochrobactrum intermedium                  |
| tr U7G9H6 U7G9H6_9RHOB         | 1 | Proteobacteria | Alphaproteobacteria   | Labrenzia sp. C1B10                       |
| tr A0A086YEL8 A0A086YEL8_9RHOB | 1 | Proteobacteria | Alphaproteobacteria   | Haematobacter missouriensis               |
| tr W6LSR3 W6LSR3_9GAMM         | 1 | Proteobacteria | Gammaproteobacteria   | Candidatus Contendobacter odensis         |
| tr D7A0D4 D7A0D4_STAND         | 1 | Proteobacteria | Alphaproteobacteria   | Starkeya novella                          |
| tr A0A085FIL3 A0A085FIL3_9RHIZ | 1 | Proteobacteria | Alphaproteobacteria   | Devosia sp. LC5                           |
| tr J9A1J9 J9A1J9_9RHOB         | 1 | Proteobacteria | Alphaproteobacteria   | Rhodovulum sp. PH10                       |
| tr A9DQS1 A9DQS1_9RHOB         | 1 | Proteobacteria | Alphaproteobacteria   | Oceanibulbus indolifex                    |
| tr I1AR71 I1AR71_9RHOB         | 1 | Proteobacteria | Alphaproteobacteria   | Citreicella sp. 357                       |
| tr A8TM92 A8TM92_9PROT         | 1 | Proteobacteria | Alphaproteobacteria   | alpha proteobacterium BAL199              |
| tr E6PQ34 E6PQ34_9ZZZZ         | 1 |                |                       | mine drainage metagenome                  |
| tr F8JCY2 F8JCY2_HYPSM         | 7 | Proteobacteria | Alphaproteobacteria   | Hyphomicrobium sp. MC1                    |
| tr D8PJK4 D8PJK4_9BACT         | 1 | Nitrospirae    | Nitrospira            | Candidatus Nitrospira defluvii            |
| tr A0A077AV80 A0A077AV80_9RICK | 1 | Proteobacteria | Alphaproteobacteria   | Candidatus Paracaedibacter acanthamoebae  |
| tr V4RDJ9 V4RDJ9_9RHIZ         | 1 | Proteobacteria | Alphaproteobacteria   | Lutibaculum baratangense                  |
| tr A0A0C2W1Z7 A0A0C2W1Z7_9PROT | 1 | Proteobacteria | Epsilonproteobacteria | Sulfurovum sp. FS08-3                     |
| tr C9Y6W8 C9Y6W8_9BURK         | 1 | Proteobacteria | Betaproteobacteria    | putative symbiont of Hydra magnipapillata |
| tr A0A0C2VMD8 A0A0C2VMD8_9PROT | 1 | Proteobacteria | Epsilonproteobacteria | Sulfurovum sp. FS06-10                    |
| tr E6WYF4 E6WYF4_NITSE         | 1 | Proteobacteria | Epsilonproteobacteria | Nitratifactor salsuginis                  |
| tr D7DJ74 D7DJ74_METV0         | 1 | Proteobacteria | Betaproteobacteria    | Methylotenera versatilis                  |
| tr A0A011QPF4 A0A011QPF4_9PROT | 1 | Proteobacteria | Betaproteobacteria    | Candidatus Accumulibacter sp. BA-93       |
| tr F2J3B6 F2J3B6_POLGS         | 1 | Proteobacteria | Alphaproteobacteria   | Polymorphum gilvum                        |
| tr I3BYE7 I3BYE7_9GAMM         | 1 | Proteobacteria | Gammaproteobacteria   | Thiothrix nivea                           |
| tr A9NDG9 A9NDG9_COXBR         | 1 | Proteobacteria | Gammaproteobacteria   | Coxiella burnetii                         |
| tr A8I863 A8I863_AZOC5         | 1 | Proteobacteria | Alphaproteobacteria   | Azorhizobium caulinodans                  |
| tr A0A017HET3 A0A017HET3_9RHOB | 1 | Proteobacteria | Alphaproteobacteria   | Loktanella hongkongensis                  |
| tr Q47GR7 Q47GR7_DECAR         | 1 | Proteobacteria | Betaproteobacteria    | Dechloromonas aromatica                   |

|                                |   |                |                     |                                   |
|--------------------------------|---|----------------|---------------------|-----------------------------------|
| tr Q13AL4 Q13AL4_RHOPS         | 1 | Proteobacteria | Alphaproteobacteria | Rhodopseudomonas palustris        |
| tr K2BGD7 K2BGD7_9BACT         | 1 |                |                     | uncultured bacterium              |
| tr K9GQ74 K9GQ74_9PROT         | 1 | Proteobacteria | Alphaproteobacteria | Caenispirillum salinarum          |
| tr D0L0H1 D0L0H1_HALNC         | 1 | Proteobacteria | Gammaproteobacteria | Halothiobacillus neapolitanus     |
| tr S9RL13 S9RL13_9RHOB         | 1 | Proteobacteria | Alphaproteobacteria | Salipiger mucosus                 |
| tr A0A099FAI4 A0A099FAI4_PARVE | 1 | Proteobacteria | Alphaproteobacteria | Paracoccus versutus               |
| tr A0A094MYJ3 A0A094MYJ3_9GAMM | 1 | Proteobacteria | Gammaproteobacteria | Thiobacillus prosperus            |
| tr N0B1J2 N0B1J2_9RHIZ         | 7 | Proteobacteria | Alphaproteobacteria | Hyphomicrobium denitrificans      |
| tr A0A0A8K6N0 A0A0A8K6N0_9RHIZ | 7 | Proteobacteria | Alphaproteobacteria | Methyloceanibacter caenitepidi    |
| tr Q11I37 Q11I37_CHESEB        | 1 | Proteobacteria | Alphaproteobacteria | Chelativorans sp. BNC1            |
| tr W0BHR6 W0BHR6_9GAMM         | 1 | Proteobacteria | Gammaproteobacteria | Legionella oakridgensis           |
| tr A5IDN0 A5IDN0_LEGPC         | 1 | Proteobacteria | Gammaproteobacteria | Legionella pneumophila            |
| tr W0TJP3 W0TJP3_9GAMM         | 1 | Proteobacteria | Gammaproteobacteria | Thiolapillus brandeum             |
| tr X4Z9H6 X4Z9H6_9BORD         | 7 | Proteobacteria | Betaproteobacteria  | Bordetella holmesii               |
| tr X7ELT6 X7ELT6_9RHOB         | 1 | Proteobacteria | Alphaproteobacteria | Roseivivax halodurans             |
| tr A0A090BUD1 A0A090BUD1_9GAMM | 1 | Proteobacteria | Gammaproteobacteria | Thioploca ingrca                  |
| tr K2BNS1 K2BNS1_9BACT         | 1 |                |                     | uncultured bacterium              |
| tr H5SAC6 H5SAC6_9GAMM         | 1 | Proteobacteria | Gammaproteobacteria | uncultured gamma proteobacterium  |
| tr H0PSW3 H0PSW3_9RHOO         | 1 | Proteobacteria | Betaproteobacteria  | Azoarcus sp. KH32C                |
| tr A4BL42 A4BL42_9GAMM         | 1 | Proteobacteria | Gammaproteobacteria | Nitrococcus mobilis               |
| tr V5SSGA2 V5SSGA2_9RHIZ       | 7 | Proteobacteria | Alphaproteobacteria | Hyphomicrobium nitratorans        |
| tr Q3SM48 Q3SM48_THIDA         | 1 | Proteobacteria | Betaproteobacteria  | Thiobacillus denitrificans        |
| tr W0V0P9 W0V0P9_9BURK         | 1 | Proteobacteria | Betaproteobacteria  | Janthinobacterium agaricidamnosum |
| tr A8PLY9 A8PLY9_9COXI         | 1 | Proteobacteria | Gammaproteobacteria | Rickettsiella grylli              |
| tr G4RGN1 G4RGN1_PELHB         | 1 | Proteobacteria | Alphaproteobacteria | Pelagibacterium halotolerans      |
| tr U2Z7D0 U2Z7D0_9RHOB         | 1 | Proteobacteria | Alphaproteobacteria | Loktanella cinnabarina            |
| tr M9RIN2 M9RIN2_9RHOB         | 1 | Proteobacteria | Alphaproteobacteria | Octadecabacter arcticus           |

|                                |    |                |                       |                                  |
|--------------------------------|----|----------------|-----------------------|----------------------------------|
| tr A0A0A1FJ80 A0A0A1FJ80_9BURK | 1  | Proteobacteria | Betaproteobacteria    | Collimonas arenae                |
| tr A0A093TGR2 A0A093TGR2_RALSL | 1  | Proteobacteria | Betaproteobacteria    | Ralstonia solanacearum           |
| tr A0A099EVU0 A0A099EVU0_9RHOB | 1  | Proteobacteria | Alphaproteobacteria   | Paracoccus halophilus            |
| tr B2IFF5 B2IFF5_BEII9         | 7  | Proteobacteria | Alphaproteobacteria   | Beijerinckia indica              |
| tr Q0A9D5 Q0A9D5_ALKEH         | 1  | Proteobacteria | Gammaproteobacteria   | Alkalilimnicola ehrlichii        |
| tr A0A0A8GQ79 A0A0A8GQ79_9PROT | 1  | Proteobacteria | Epsilonproteobacteria | Campylobacter peloridis          |
| tr A0A084INE6 A0A084INE6_9GAMM | 1  | Proteobacteria | Gammaproteobacteria   | Salinisphaera hydrothermalis     |
| tr M3IM68 M3IM68_9PROT         | 1  | Proteobacteria | Epsilonproteobacteria | Campylobacter showae             |
| tr L8XXV6 L8XXV6_9GAMM         | 1  | Proteobacteria | Gammaproteobacteria   | Wohlfahrtiimonas chitiniclastica |
| tr T1X3K2 T1X3K2_VARPD         | 1  | Proteobacteria | Betaproteobacteria    | Variovorax paradoxus             |
| tr F5Y4Q4 F5Y4Q4_RAMTT         | 1  | Proteobacteria | Betaproteobacteria    | Ramlibacter tataouinensis        |
| tr K2BWT1 K2BWT1_9BACT         | 1  |                |                       | uncultured bacterium             |
| tr M5DVB0 M5DVB0_9PROT         | 1  | Proteobacteria | Betaproteobacteria    | Nitrosospira sp. APG3            |
| tr B4UAD8 B4UAD8_ANASK         | 29 | Proteobacteria | Deltaproteobacteria   | Anaeromyxobacter sp. K           |
| tr Q0G008 Q0G008_9RHIZ         | 1  | Proteobacteria | Alphaproteobacteria   | Fulvimarina pelagi               |
| tr S3XRK7 S3XRK7_9PROT         | 1  | Proteobacteria | Epsilonproteobacteria | Campylobacter ureolyticus        |
| tr A0A059HYU4 A0A059HYU4_CAMJU | 1  | Proteobacteria | Epsilonproteobacteria | Campylobacter jejuni             |
| tr O67491 O67491_AQUAE         | 1  | Aquificae      | Aquificae             | Aquifex aeolicus                 |
| tr A1SVF6 A1SVF6_PSYIN         | 1  | Proteobacteria | Gammaproteobacteria   | Psychromonas ingrahamii          |
| tr N6V7S3 N6V7S3_9RHIZ         | 1  | Proteobacteria | Alphaproteobacteria   | Rhizobium freirei                |
| tr F5R923 F5R923_METUF         | 1  | Proteobacteria | Betaproteobacteria    | Methyloversatilis universalis    |
| tr Q1YMZ5 Q1YMZ5_MOBAS         | 1  | Proteobacteria | Alphaproteobacteria   | Aurantimonas manganooxydans      |
| tr E0MKS7 E0MKS7_9RHOB         | 1  | Proteobacteria | Alphaproteobacteria   | Ahrensia sp. R2A130              |
| tr L0EV30 L0EV30_LIBCB         | 36 | Proteobacteria | Alphaproteobacteria   | Liberibacter crescens            |
| tr Q1GYQ2 Q1GYQ2_METFK         | 1  | Proteobacteria | Betaproteobacteria    | Methylobacillus flagellatus      |
| tr A0A0A8BEL8 A0A0A8BEL8_9BURK | 1  | Proteobacteria | Betaproteobacteria    | Pandoraea sputorum               |
| tr C9RK73 C9RK73_FIBSS         | 1  | Fibrobacteres  | Fibrobacteria         | Fibrobacter succinogenes         |

|                                |   |                |                       |                                        |
|--------------------------------|---|----------------|-----------------------|----------------------------------------|
| tr U1H7F6 U1H7F6_9BRAD         | 1 | Proteobacteria | Alphaproteobacteria   | Bradyrhizobium sp. DFCI-1              |
| tr E7G4E4 E7G4E4_9HELI         | 1 | Proteobacteria | Epsilonproteobacteria | Helicobacter suis                      |
| tr G3IS04 G3IS04_9GAMM         | 1 | Proteobacteria | Gammaproteobacteria   | Methylobacter tundripaludum            |
| tr E6VPM6 E6VPM6_RHOPX         | 7 | Proteobacteria | Alphaproteobacteria   | Rhodopseudomonas palustris             |
| tr U6B5C2 U6B5C2_9RHIZ         | 1 | Proteobacteria | Alphaproteobacteria   | Candidatus Liberibacter americanus     |
| tr H9UGG4 H9UGG4_SPIAZ         | 1 | Spirochaetes   | Spirochaetia          | Spirochaeta africana                   |
| tr C8PG52 C8PG52_9PROT         | 1 | Proteobacteria | Epsilonproteobacteria | Campylobacter gracilis                 |
| tr E5AMH6 E5AMH6_BURRH         | 1 | Proteobacteria | Betaproteobacteria    | Burkholderia rhizoxinica               |
| tr Q82TE2 Q82TE2_NITEU         | 1 | Proteobacteria | Betaproteobacteria    | Nitrosomonas europaea                  |
| tr T1DHA0 T1DHA0_9ZZZZ         | 1 |                |                       | mine drainage metagenome               |
| tr A7ZD92 A7ZD92_CAMC1         | 1 | Proteobacteria | Epsilonproteobacteria | Campylobacter concisus                 |
| tr A0A063Y3A9 A0A063Y3A9_9GAMM | 1 | Proteobacteria | Gammaproteobacteria   | Nitrincola lacisaponensis              |
| tr B0VHY9 B0VHY9_CLOAI         | 1 | Cloacimonetes  |                       | Candidatus Cloacimonas acidaminovorans |
| tr F9ZMQ1 F9ZMQ1_ACICS         | 1 | Proteobacteria | Gammaproteobacteria   | Acidithiobacillus caldus               |
| tr M1Q0H5 M1Q0H5_9ZZZZ         | 1 |                |                       | uncultured organism                    |
| tr E4QMA4 E4QMA4_METS6         | 1 | Proteobacteria | Betaproteobacteria    | Methylovorus sp. MP688                 |
| tr X0SVT9 X0SVT9_9ZZZZ         | 1 |                |                       | marine sediment metagenome             |
| tr R9Q3A0 R9Q3A0_9AQUI         | 1 | Aquificae      | Aquificae             | Hydrogenobaculum sp. SHO               |
| tr A0A0A1VM91 A0A0A1VM91_9BURK | 1 | Proteobacteria | Betaproteobacteria    | Acidovorax sp. MR-S7                   |
| tr H1XWC3 H1XWC3_9BACT         | 1 |                |                       | Caldithrix abyssi                      |
| tr U5XWV8 U5XWV8_CAMFE         | 1 | Proteobacteria | Epsilonproteobacteria | Campylobacter fetus                    |
| tr A0A038GNJ3 A0A038GNJ3_9BURK | 1 | Proteobacteria | Betaproteobacteria    | Burkholderia sp. MP-1                  |
| tr Q7MQT8 Q7MQT8_WOLSU         | 1 | Proteobacteria | Epsilonproteobacteria | Wolinella succinogenes                 |
| tr D6Z3S5 D6Z3S5_DESAT         | 1 | Proteobacteria | Deltaproteobacteria   | Desulfurivibrio alkaliphilus           |
| tr Q60CD6 Q60CD6_METCA         | 1 | Proteobacteria | Gammaproteobacteria   | Methylococcus capsulatus               |
| tr E6QSE7 E6QSE7_9ZZZZ         | 1 |                |                       | mine drainage metagenome               |
| tr U7DAR1 U7DAR1_9BACT         | 1 | Fibrobacteres  | Chitinivibrionia      | Chitinivibrio alkaliphilus             |



|                                |   |                |                |                                        |
|--------------------------------|---|----------------|----------------|----------------------------------------|
| tr E8WAI5 E8WAI5_STRFA         | 2 | Actinobacteria | Actinobacteria | <i>Streptomyces pratensis</i>          |
| tr W5WGQ0 W5WGQ0_9PSEU         | 2 | Actinobacteria | Actinobacteria | <i>Kutzneria albida</i>                |
| tr H5XNG6 H5XNG6_9PSEU         | 2 | Actinobacteria | Actinobacteria | <i>Saccharomonospora cyanea</i>        |
| tr F4CXJ7 F4CXJ7_PSEUX         | 2 | Actinobacteria | Actinobacteria | <i>Pseudonocardia dioxanivorans</i>    |
| tr A0A099D9G8 A0A099D9G8_9ACTO | 2 | Actinobacteria | Actinobacteria | <i>Actinopolyspora erythraea</i>       |
| tr D9UWI5 D9UWI5_9ACTO         | 2 | Actinobacteria | Actinobacteria | <i>Streptomyces</i> sp. AA4            |
| tr M2Z3P3 M2Z3P3_9PSEU         | 2 | Actinobacteria | Actinobacteria | <i>Amycolatopsis decaplanina</i>       |
| tr A0A0A1DIE7 A0A0A1DIE7_NOCSI | 2 | Actinobacteria | Actinobacteria | <i>Pimelobacter simplex</i>            |
| tr A0A0B7CGE0 A0A0B7CGE0_9PSEU | 2 | Actinobacteria | Actinobacteria | <i>Kibdelosporangium</i> sp. MJ126-NF4 |
| tr A0A0C1L1Y3 A0A0C1L1Y3_9PSEU | 2 | Actinobacteria | Actinobacteria | <i>Prauserella</i> sp. Am3             |
| tr C6WH34 C6WH34_ACTMD         | 2 | Actinobacteria | Actinobacteria | <i>Actinosynnema mirum</i>             |
| tr D2PUA3 D2PUA3_KRIFD         | 2 | Actinobacteria | Actinobacteria | <i>Kribbella flavida</i>               |
| tr W9DM11 W9DM11_9PSEU         | 2 | Actinobacteria | Actinobacteria | <i>Amycolatopsis halophila</i>         |
| tr A0A081EI46 A0A081EI46_STRFR | 2 | Actinobacteria | Actinobacteria | <i>Streptomyces fradiae</i>            |
| tr V9XFQ6 V9XFQ6_9NOCA         | 2 | Actinobacteria | Actinobacteria | <i>Rhodococcus pyridinivorans</i>      |
| tr D3Q8W0 D3Q8W0_STANL         | 2 | Actinobacteria | Actinobacteria | <i>Stackebrandtia nassauensis</i>      |
| tr J9SC86 J9SC86_9ACTO         | 2 | Actinobacteria | Actinobacteria | <i>Gordonia</i> sp. KTR9               |
| tr H6RMV1 H6RMV1_BLASD         | 2 | Actinobacteria | Actinobacteria | <i>Blastococcus saxobsidens</i>        |
| tr R7Y1D9 R7Y1D9_9ACTO         | 2 | Actinobacteria | Actinobacteria | <i>Nocardioides</i> sp. CF8            |
| tr E6S9N9 E6S9N9_INTC7         | 2 | Actinobacteria | Actinobacteria | <i>Intrasporangium calvum</i>          |
| tr E6JBH9 E6JBH9_9ACTO         | 2 | Actinobacteria | Actinobacteria | <i>Dietzia cinnamea</i>                |
| tr E2SGB3 E2SGB3_9ACTO         | 2 | Actinobacteria | Actinobacteria | <i>Aeromicrobium marinum</i>           |
| tr A0A0A1DTM0 A0A0A1DTM0_NOCSI | 2 | Actinobacteria | Actinobacteria | <i>Pimelobacter simplex</i>            |
| tr D1A3A3 D1A3A3_THECD         | 2 | Actinobacteria | Actinobacteria | <i>Thermomonospora curvata</i>         |
| tr F6EHT1 F6EHT1_AMYSD         | 2 | Actinobacteria | Actinobacteria | <i>Amycolicoccus subflavus</i>         |
| tr D5UQ87 D5UQ87_TSUPD         | 2 | Actinobacteria | Actinobacteria | <i>Tsukamurella paurometabola</i>      |
| tr E9UWC8 E9UWC8_9ACTO         | 2 | Actinobacteria | Actinobacteria | <i>Nocardioideae bacterium Broad-1</i> |

|                                |   |                |                |                                    |
|--------------------------------|---|----------------|----------------|------------------------------------|
| tr T5IB76 T5IB76_RHOER         | 2 | Actinobacteria | Actinobacteria | Rhodococcus erythropolis           |
| tr A0A0B2BME5 A0A0B2BME5_9ACTO | 2 | Actinobacteria | Actinobacteria | Mumia flava                        |
| tr A0A0B8N9A0 A0A0B8N9A0_9NOCA | 2 | Actinobacteria | Actinobacteria | Nocardia seriolae                  |
| tr Q5YWK4 Q5YWK4_NOCFA         | 2 | Actinobacteria | Actinobacteria | Nocardia farcinica                 |
| tr W5TFE2 W5TFE2_9NOCA         | 2 | Actinobacteria | Actinobacteria | Nocardia nova                      |
| tr A0A022LN77 A0A022LN77_9ACTO | 2 | Actinobacteria | Actinobacteria | Dietzia sp. UCD-THP                |
| tr R7XXX0 R7XXX0_9ACTO         | 2 | Actinobacteria | Actinobacteria | Nocardioides sp. CF8               |
| tr F6EN33 F6EN33_AMYSD         | 2 | Actinobacteria | Actinobacteria | Amycolobicoccus subflavus          |
| tr G7GUZ4 G7GUZ4_9ACTO         | 2 | Actinobacteria | Actinobacteria | Gordonia amarae                    |
| tr E9V0Z2 E9V0Z2_9ACTO         | 2 | Actinobacteria | Actinobacteria | Nocardioideaceae bacterium Broad-1 |
| tr H5X8F8 H5X8F8_9PSEU         | 2 | Actinobacteria | Actinobacteria | Saccharomonospora marina           |
| tr W8HDM9 W8HDM9_RHOOP         | 2 | Actinobacteria | Actinobacteria | Rhodococcus opacus                 |
| tr W5TAK2 W5TAK2_9NOCA         | 2 | Actinobacteria | Actinobacteria | Nocardia nova                      |
| tr A0A076N1G7 A0A076N1G7_AMYME | 2 | Actinobacteria | Actinobacteria | Amycolatopsis methanolica          |
| tr M0QIR0 M0QIR0_9ACTO         | 2 | Actinobacteria | Actinobacteria | Gordonia soli                      |
| tr A0A0B2Y2J3 A0A0B2Y2J3_9MYCO | 2 | Actinobacteria | Actinobacteria | Mycobacterium setense              |
| tr A1TCM7 A1TCM7_MYCVP         | 2 | Actinobacteria | Actinobacteria | Mycobacterium vanbaalenii          |
| tr W5WJM9 W5WJM9_9PSEU         | 2 | Actinobacteria | Actinobacteria | Kutzneria albida                   |
| tr L7KN85 L7KN85_9ACTO         | 2 | Actinobacteria | Actinobacteria | Gordonia aichiensis                |
| tr L7L6G7 L7L6G7_9ACTO         | 2 | Actinobacteria | Actinobacteria | Gordonia hirsuta                   |
| tr L7LN06 L7LN06_9ACTO         | 2 | Actinobacteria | Actinobacteria | Gordonia sihwensis                 |
| tr X8A4N1 X8A4N1_MYCAV         | 2 | Actinobacteria | Actinobacteria | Mycobacterium avium                |
| tr L7KHC4 L7KHC4_9ACTO         | 2 | Actinobacteria | Actinobacteria | Gordonia aichiensis                |
| tr X7YA39 X7YA39_MYCKA         | 2 | Actinobacteria | Actinobacteria | Mycobacterium kansasii             |
| tr R4MIZ7 R4MIZ7_MYCTX         | 2 | Actinobacteria | Actinobacteria | Mycobacterium tuberculosis         |
| tr X0QWU6 X0QWU6_9NOCA         | 2 | Actinobacteria | Actinobacteria | Rhodococcus wratislaviensis        |
| tr G8RXD4 G8RXD4_MYCRN         | 2 | Actinobacteria | Actinobacteria | Mycobacterium rhodesiae            |

|                                |    |                |                |                              |
|--------------------------------|----|----------------|----------------|------------------------------|
| tr Q8VKQ6 Q8VKQ6_MYCTO         | 2  | Actinobacteria | Actinobacteria | Mycobacterium tuberculosis   |
| tr H5TQ33 H5TQ33_9ACTO         | 2  | Actinobacteria | Actinobacteria | Gordonia otitidis            |
| tr L0INV5 L0INV5_MYCSM         | 2  | Actinobacteria | Actinobacteria | Mycobacterium smegmatis      |
| tr L8DA64 L8DA64_9NOCA         | 2  | Actinobacteria | Actinobacteria | Rhodococcus sp. AW25M09      |
| tr G7GSR6 G7GSR6_9ACTO         | 2  | Actinobacteria | Actinobacteria | Gordonia amarae              |
| tr K5BIM6 K5BIM6_9MYCO         | 2  | Actinobacteria | Actinobacteria | Mycobacterium hassiacum      |
| tr C1B001 C1B001_RHOOB         | 2  | Actinobacteria | Actinobacteria | Rhodococcus opacus           |
| tr M2XHC6 M2XHC6_9NOCA         | 2  | Actinobacteria | Actinobacteria | Rhodococcus triatomae        |
| tr H5X5Q5 H5X5Q5_9PSEU         | 2  | Actinobacteria | Actinobacteria | Saccharomonospora marina     |
| tr H6RAR5 H6RAR5_NOCCG         | 2  | Actinobacteria | Actinobacteria | Nocardia cyriacigeorgica     |
| tr A0A0A1DSN4 A0A0A1DSN4_NOCSI | 2  | Actinobacteria | Actinobacteria | Pimelobacter simplex         |
| tr M0QMW8 M0QMW8_9ACTO         | 2  | Actinobacteria | Actinobacteria | Gordonia soli                |
| tr K0V4J6 K0V4J6_MYCFO         | 2  | Actinobacteria | Actinobacteria | Mycobacterium fortuitum      |
| tr E2S871 E2S871_9ACTO         | 2  | Actinobacteria | Actinobacteria | Aeromicrobium marinum        |
| tr G7GP47 G7GP47_9ACTO         | 2  | Actinobacteria | Actinobacteria | Gordonia amarae              |
| tr H0R660 H0R660_9ACTO         | 2  | Actinobacteria | Actinobacteria | Gordonia effusa              |
| tr X7Y291 X7Y291_MYCKA         | 2  | Actinobacteria | Actinobacteria | Mycobacterium kansasii       |
| tr U0EPN6 U0EPN6_9NOCA         | 2  | Actinobacteria | Actinobacteria | Rhodococcus sp. P27          |
| tr M2WUF8 M2WUF8_9NOCA         | 2  | Actinobacteria | Actinobacteria | Rhodococcus triatomae        |
| tr I0PGT7 I0PGT7_MYCAB         | 2  | Actinobacteria | Actinobacteria | Mycobacterium abscessus      |
| tr H6R1K7 H6R1K7_NOCCG         | 2  | Actinobacteria | Actinobacteria | Nocardia cyriacigeorgica     |
| tr K0UZ20 K0UZ20_MYCVA         | 2  | Actinobacteria | Actinobacteria | Mycobacterium vaccae         |
| tr F5YUN8 F5YUN8_MYCSD         | 2  | Actinobacteria | Actinobacteria | Mycobacterium sp. JDM601     |
| tr G7GTS9 G7GTS9_9ACTO         | 2  | Actinobacteria | Actinobacteria | Gordonia amarae              |
| tr D0L6Z9 D0L6Z9_GORB4         | 2  | Actinobacteria | Actinobacteria | Gordonia bronchialis         |
| tr F4CXJ3 F4CXJ3_PSEUX         | 2  | Actinobacteria | Actinobacteria | Pseudonocardia dioxanivorans |
| tr X8CVC8 X8CVC8_MYCIT         | 12 | Actinobacteria | Actinobacteria | Mycobacterium intracellulare |

|                                |   |                 |                     |                                    |
|--------------------------------|---|-----------------|---------------------|------------------------------------|
| tr E9V1A0 E9V1A0_9ACTO         | 2 | Actinobacteria  | Actinobacteria      | Nocardioideae bacterium Broad-1    |
| tr K6XI89 K6XI89_9ACTO         | 2 | Actinobacteria  | Actinobacteria      | Gordonia namibiensis               |
| tr W5WIN9 W5WIN9_9PSEU         | 2 | Actinobacteria  | Actinobacteria      | Kutzneria albida                   |
| tr D1A3J0 D1A3J0_THECD         | 2 | Actinobacteria  | Actinobacteria      | Thermomonospora curvata            |
| tr R6ABR7 R6ABR7_9PROT         | 1 | Proteobacteria  |                     | Proteobacteria bacterium CAG:139   |
| tr R6ACY1 R6ACY1_9PROT         | 1 | Proteobacteria  |                     | Proteobacteria bacterium CAG:139   |
| tr C1DCY3 C1DCY3_LARHH         | 1 | Proteobacteria  | Betaproteobacteria  | Laribacter hongkongensis           |
| tr X7R9Z9 X7R9Z9_VIBPH         | 1 | Proteobacteria  | Gammaproteobacteria | Vibrio parahaemolyticus            |
| tr W9VAF1 W9VAF1_9GAMM         | 1 | Proteobacteria  | Gammaproteobacteria | Thiorhodococcus sp. AK35           |
| tr W0DNQ7 W0DNQ7_9GAMM         | 1 | Proteobacteria  | Gammaproteobacteria | Thioalkalivibrio thiocyanoxidans   |
| tr C0QIN1 C0QIN1_DESAH         | 1 | Proteobacteria  | Deltaproteobacteria | Desulfobacterium autotrophicum     |
| tr N1WBP2 N1WBP2_9LEPT         | 1 | Spirochaetes    | Spirochaetia        | Leptospira vanthielii              |
| tr H1G2K8 H1G2K8_9GAMM         | 1 | Proteobacteria  | Gammaproteobacteria | Ectothiorhodospira sp. PHS-1       |
| tr A0A066PRJ9 A0A066PRJ9_9PROT | 1 | Proteobacteria  | Alphaproteobacteria | Acidiphilium sp. JA12-A1           |
| tr G4E6M2 G4E6M2_9GAMM         | 1 | Proteobacteria  | Gammaproteobacteria | Thiorhodospira sibirica            |
| tr A4SXS4 A4SXS4_POLSQ         | 1 | Proteobacteria  | Betaproteobacteria  | Polynucleobacter necessarius       |
| tr B9XQZ7 B9XQZ7_PEDPL         | 1 | Verrucomicrobia | Verrucomicrobiae    | Pedosphaera parvula                |
| tr F0JL42 F0JL42_DESDE         | 1 | Proteobacteria  | Deltaproteobacteria | Desulfovibrio desulfuricans        |
| tr Q1NX33 Q1NX33_9DELT         | 1 | Proteobacteria  | Deltaproteobacteria | delta proteobacterium MLMS-1       |
| tr F3Z0E1 F3Z0E1_DESAF         | 1 | Proteobacteria  | Deltaproteobacteria | Desulfovibrio africanus            |
| tr C6C1P5 C6C1P5_DESAD         | 1 | Proteobacteria  | Deltaproteobacteria | Desulfovibrio salexigens           |
| tr H0A0J8 H0A0J8_9PROT         | 1 | Proteobacteria  | Alphaproteobacteria | Acetobacteraceae bacterium AT-5844 |
| tr K1Z964 K1Z964_9BACT         | 1 |                 |                     | uncultured bacterium               |
| tr A0A0B0EB06 A0A0B0EB06_9BACT | 1 | Planctomycetes  | Planctomycetia      | Candidatus Scalindua brodae        |
| tr K0NPF9 K0NPF9_DESTT         | 1 | Proteobacteria  | Deltaproteobacteria | Desulfobacula toluolica            |
| tr I5B7B9 I5B7B9_9DELT         | 1 | Proteobacteria  | Deltaproteobacteria | Desulfobacter postgatei            |
| tr D5H5N7 D5H5N7_SALRM         | 1 | Bacteroidetes   |                     | Salinibacter ruber                 |

|                                 |   |                 |                     |                                 |
|---------------------------------|---|-----------------|---------------------|---------------------------------|
| tr Q3A0X1 Q3A0X1_PELCD          | 1 | Proteobacteria  | Deltaproteobacteria | Pelobacter carbinolicus         |
| tr X0XD94 X0XD94_9ZZZZ          | 1 |                 |                     | marine sediment metagenome      |
| tr Q5NTF0 Q5NTF0_9BACT          | 1 |                 |                     | uncultured bacterium            |
| tr S0G044 S0G044_9DELT          | 1 | Proteobacteria  | Deltaproteobacteria | Desulfotignum phosphitoxidans   |
| tr I6B3M6 I6B3M6_9BACT          | 1 | Verrucomicrobia | Opitutae            | Opitutaceae bacterium TAV1      |
| tr A0A066TEL1 A0A066TEL1_9GAMM  | 1 | Proteobacteria  | Gammaproteobacteria | Gilliamella apicola             |
| tr U1KNB8 U1KNB8_9GAMM          | 1 | Proteobacteria  | Gammaproteobacteria | Pseudoalteromonas citrea        |
| tr H5T8I0 H5T8I0_9ALTE          | 1 | Proteobacteria  | Gammaproteobacteria | Glaciecola punicea              |
| tr T1CNB6 T1CNB6_9ZZZZ          | 1 |                 |                     | mine drainage metagenome        |
| tr R5XY65 R5XY65_9PROT          | 1 | Proteobacteria  | Alphaproteobacteria | Acetobacter sp. CAG:267         |
| tr W6KJD9 W6KJD9_9PROT          | 1 | Proteobacteria  | Alphaproteobacteria | Magnetospira sp. QH-2           |
| tr C6V519 C6V519_NEORI          | 1 | Proteobacteria  | Alphaproteobacteria | Neorickettsia risticii          |
| tr H6SP71 H6SP71_RHOPH          | 1 | Proteobacteria  | Alphaproteobacteria | Rhodospirillum photometricum    |
| tr A0A076ECD6 A0A076ECD6_RHOOP  | 1 | Actinobacteria  | Actinobacteria      | Rhodococcus opacus              |
| tr A0A0B8N996 A0A0B8N996_9NOCA  | 1 | Actinobacteria  | Actinobacteria      | Nocardia seriolae               |
| tr V5XHK3 V5XHK3_MYCNE          | 1 | Actinobacteria  | Actinobacteria      | Mycobacterium neoaurum          |
| tr M0QIQ5 M0QIQ5_9ACTO          | 1 | Actinobacteria  | Actinobacteria      | Gordonia soli                   |
| tr E6JDS4 E6JDS4_9ACTO          | 1 | Actinobacteria  | Actinobacteria      | Dietzia cinnamea                |
| tr J5E3K3 J5E3K3_9MYCO          | 2 | Actinobacteria  | Actinobacteria      | Mycobacterium colombiense       |
| tr W8HDM4 W8HDM4_RHOOP          | 1 | Actinobacteria  | Actinobacteria      | Rhodococcus opacus              |
| tr A0A024K3A8 A0A024K3A8_9MYCO  | 1 | Actinobacteria  | Actinobacteria      | Mycobacterium triplex           |
| tr G7CJW9 G7CJW9_MYCTH          | 1 | Actinobacteria  | Actinobacteria      | Mycobacterium thermoresistibile |
| tr Q7D9K7 Q7D9K7_MYCTO          | 1 | Actinobacteria  | Actinobacteria      | Mycobacterium tuberculosis      |
| tr G7GUZ9 G7GUZ9_9ACTO          | 1 | Actinobacteria  | Actinobacteria      | Gordonia amarae                 |
| tr W5TFD9 W5TFD9_9NOCA          | 1 | Actinobacteria  | Actinobacteria      | Nocardia nova                   |
| tr A0A076N1F8 A0A076N1F8_9AMYME | 2 | Actinobacteria  | Actinobacteria      | Amycolatopsis methanolica       |
| tr X8A2N5 X8A2N5_MYCAV          | 1 | Actinobacteria  | Actinobacteria      | Mycobacterium avium             |

|                                |   |                |                |                                    |
|--------------------------------|---|----------------|----------------|------------------------------------|
| tr X8AE45 X8AE45_MYCAV         | 2 | Actinobacteria | Actinobacteria | Mycobacterium avium                |
| tr L7L6H6 L7L6H6_9ACTO         | 1 | Actinobacteria | Actinobacteria | Gordonia hirsuta                   |
| tr U5ECA5 U5ECA5_NOCAS         | 1 | Actinobacteria | Actinobacteria | Nocardia asteroides                |
| tr G7GKG8 G7GKG8_9ACTO         | 1 | Actinobacteria | Actinobacteria | Gordonia amarae                    |
| tr G7H1J2 G7H1J2_9ACTO         | 1 | Actinobacteria | Actinobacteria | Gordonia araii                     |
| tr V5X6N2 V5X6N2_MYCNE         | 1 | Actinobacteria | Actinobacteria | Mycobacterium neoaurum             |
| tr I0WL21 I0WL21_9NOCA         | 1 | Actinobacteria | Actinobacteria | Rhodococcus imtechensis            |
| tr W5WJM4 W5WJM4_9PSEU         | 1 | Actinobacteria | Actinobacteria | Kutzneria albida                   |
| tr E9V0Y7 E9V0Y7_9ACTO         | 1 | Actinobacteria | Actinobacteria | Nocardioideaceae bacterium Broad-1 |
| tr D1A398 D1A398_THECD         | 1 | Actinobacteria | Actinobacteria | Thermomonospora curvata            |
| tr R7Y399 R7Y399_9ACTO         | 1 | Actinobacteria | Actinobacteria | Gordonia terrae                    |
| tr E2S876 E2S876_9ACTO         | 1 | Actinobacteria | Actinobacteria | Aeromicrobium marinum              |
| tr H5TSB2 H5TSB2_9ACTO         | 1 | Actinobacteria | Actinobacteria | Gordonia otitidis                  |
| tr W7IML6 W7IML6_9PSEU         | 1 | Actinobacteria | Actinobacteria | Actinokineospora sp. EG49          |
| tr X7YBW9 X7YBW9_MYCKA         | 1 | Actinobacteria | Actinobacteria | Mycobacterium kansasii             |
| tr W7SAJ9 W7SAJ9_9PSEU         | 1 | Actinobacteria | Actinobacteria | Kutzneria sp. 744                  |
| tr D2PU98 D2PU98_KRIFD         | 1 | Actinobacteria | Actinobacteria | Kribbella flavida                  |
| tr J2K2G4 J2K2G4_9ACTO         | 1 | Actinobacteria | Actinobacteria | Streptomyces auratus               |
| tr D3QB66 D3QB66_STANL         | 2 | Actinobacteria | Actinobacteria | Stackebrandtia nassauensis         |
| tr E6S9N4 E6S9N4_INTC7         | 1 | Actinobacteria | Actinobacteria | Intrasporangium calvum             |
| tr E9UWC3 E9UWC3_9ACTO         | 1 | Actinobacteria | Actinobacteria | Nocardioideaceae bacterium Broad-1 |
| tr A0A0A1DJ20 A0A0A1DJ20_NOCSI | 1 | Actinobacteria | Actinobacteria | Pimelobacter simplex               |
| tr H6RMU6 H6RMU6_BLASD         | 2 | Actinobacteria | Actinobacteria | Blastococcus saxobsidens           |
| tr D6KCL8 D6KCL8_9ACTO         | 1 | Actinobacteria | Actinobacteria | Streptomyces sp. e14               |
| tr A0A0B2BN83 A0A0B2BN83_9ACTO | 1 | Actinobacteria | Actinobacteria | Mumia flava                        |
| tr M7AA00 M7AA00_9ACTO         | 1 | Actinobacteria | Actinobacteria | Gordonia sp. NB4-1Y                |
| tr A0A0A1DLG3 A0A0A1DLG3_NOCSI | 1 | Actinobacteria | Actinobacteria | Pimelobacter simplex               |

|                                |   |                |                |                                 |
|--------------------------------|---|----------------|----------------|---------------------------------|
| tr F6EHT6 F6EHT6_AMYSD         | 2 | Actinobacteria | Actinobacteria | Amycoliticoccus subflavus       |
| tr U0E8H8 U0E8H8_9NOCA         | 1 | Actinobacteria | Actinobacteria | Rhodococcus sp. P27             |
| tr A0A0C1L1Y7 A0A0C1L1Y7_9PSEU | 2 | Actinobacteria | Actinobacteria | Prauserella sp. Am3             |
| tr A0A0A1DM07 A0A0A1DM07_NOCSI | 1 | Actinobacteria | Actinobacteria | Pimelobacter simplex            |
| tr L2T7U8 L2T7U8_9NOCA         | 1 | Actinobacteria | Actinobacteria | Rhodococcus wratislaviensis     |
| tr E2SGA8 E2SGA8_9ACTO         | 2 | Actinobacteria | Actinobacteria | Aeromicrobium marinum           |
| tr R7XXX5 R7XXX5_9ACTO         | 2 | Actinobacteria | Actinobacteria | Nocardioides sp. CF8            |
| tr L8DA69 L8DA69_9NOCA         | 1 | Actinobacteria | Actinobacteria | Rhodococcus sp. AW25M09         |
| tr E2SCR0 E2SCR0_9ACTO         | 1 | Actinobacteria | Actinobacteria | Aeromicrobium marinum           |
| tr A0A059MGR1 A0A059MGR1_9NOCA | 2 | Actinobacteria | Actinobacteria | Rhodococcus sp. BCP1            |
| tr C1B006 C1B006_RHOOB         | 1 | Actinobacteria | Actinobacteria | Rhodococcus opacus              |
| tr C6WH39 C6WH39_ACTMD         | 1 | Actinobacteria | Actinobacteria | Actinosynnema mirum             |
| tr H5X8G3 H5X8G3_9PSEU         | 1 | Actinobacteria | Actinobacteria | Saccharomonospora marina        |
| tr A0A073BDE9 A0A073BDE9_9PSEU | 2 | Actinobacteria | Actinobacteria | Saccharopolyspora rectivirgula  |
| tr H5X5R0 H5X5R0_9PSEU         | 1 | Actinobacteria | Actinobacteria | Saccharomonospora marina        |
| tr K6VSM1 K6VSM1_9ACTO         | 1 | Actinobacteria | Actinobacteria | Gordonia rhizosphaera           |
| tr L8DGB2 L8DGB2_9NOCA         | 1 | Actinobacteria | Actinobacteria | Rhodococcus sp. AW25M09         |
| tr E9UWP1 E9UWP1_9ACTO         | 1 | Actinobacteria | Actinobacteria | Nocardioideae bacterium Broad-1 |
| tr A0A0A1FX38 A0A0A1FX38_9MYCO | 1 | Actinobacteria | Actinobacteria | Mycobacterium sp. VKM Ac-1817D  |
| tr A0A088DHD2 A0A088DHD2_MYCAV | 1 | Actinobacteria | Actinobacteria | Mycobacterium avium             |
| tr H0R665 H0R665_9ACTO         | 1 | Actinobacteria | Actinobacteria | Gordonia effusa                 |
| tr X8DHC4 X8DHC4_MYCAB         | 1 | Actinobacteria | Actinobacteria | Mycobacterium abscessus         |
| tr A0A0B8NJT9 A0A0B8NJT9_9NOCA | 1 | Actinobacteria | Actinobacteria | Nocardia seriolae               |
| tr M2XN33 M2XN33_9NOCA         | 1 | Actinobacteria | Actinobacteria | Rhodococcus qingshengii         |
| tr H0R4X2 H0R4X2_9ACTO         | 1 | Actinobacteria | Actinobacteria | Gordonia effusa                 |
| tr W5TQG3 W5TQG3_9NOCA         | 1 | Actinobacteria | Actinobacteria | Nocardia nova                   |
| tr U5EGV5 U5EGV5_NOCAS         | 1 | Actinobacteria | Actinobacteria | Nocardia asteroides             |

|                                |   |                |                     |                                             |
|--------------------------------|---|----------------|---------------------|---------------------------------------------|
| tr G7GTT4 G7GTT4_9ACTO         | 1 | Actinobacteria | Actinobacteria      | Gordonia amarae                             |
| tr R4UK58 R4UK58_MYCAB         | 1 | Actinobacteria | Actinobacteria      | Mycobacterium abscessus                     |
| tr A0A0A1DM34 A0A0A1DM34_NOCSI | 1 | Actinobacteria | Actinobacteria      | Pimelobacter simplex                        |
| tr A0A049DP51 A0A049DP51_MYCAV | 1 | Actinobacteria | Actinobacteria      | Mycobacterium avium                         |
| tr D5UP37 D5UP37_TSUPD         | 1 | Actinobacteria | Actinobacteria      | Tsukamurella paurometabola                  |
| tr A0A0B8KPG8 A0A0B8KPG8_MYCPC | 1 | Actinobacteria | Actinobacteria      | Mycobacterium avium                         |
| tr A0A0B8NMN5 A0A0B8NMN5_9NOCA | 1 | Actinobacteria | Actinobacteria      | Nocardia seriolae                           |
| tr L7KYU3 L7KYU3_9ACTO         | 1 | Actinobacteria | Actinobacteria      | Gordonia amicalis                           |
| tr X8DX53 X8DX53_MYCAB         | 1 | Actinobacteria | Actinobacteria      | Mycobacterium abscessus                     |
| tr F1YGH6 F1YGH6_9ACTO         | 1 | Actinobacteria | Actinobacteria      | Gordonia neofelifaecis                      |
| tr G7H7G3 G7H7G3_9ACTO         | 1 | Actinobacteria | Actinobacteria      | Gordonia araii                              |
| tr U5EFA8 U5EFA8_NOCAS         | 1 | Actinobacteria | Actinobacteria      | Nocardia asteroides                         |
| tr H0QYR9 H0QYR9_9ACTO         | 1 | Actinobacteria | Actinobacteria      | Gordonia effusa                             |
| tr A0A062XQ08 A0A062XQ08_9BACT | 1 | Acidobacteria  |                     | Thermoanaerobaculum aquaticum               |
| tr A0A084T2A7 A0A084T2A7_9DELT | 1 | Proteobacteria | Deltaproteobacteria | Cystobacter violaceus                       |
| tr I3IJ79 I3IJ79_9PLAN         | 1 | Planctomycetes | Planctomycetia      | planctomycete KSU-1                         |
| tr G2LF04 G2LF04_CHLTF         | 1 | Acidobacteria  |                     | Candidatus Chloracidobacterium thermophilum |
| tr A9F8B6 A9F8B6_SORC5         | 1 | Proteobacteria | Deltaproteobacteria | Sorangium cellulosum                        |
| tr A0A0B5FRU7 A0A0B5FRU7_9DELT | 1 | Proteobacteria | Deltaproteobacteria | Geoalkalibacter subterraneus                |
| tr B9M828 B9M828_GEODF         | 1 | Proteobacteria | Deltaproteobacteria | Geobacter daltonii                          |
| tr Q1IHY3 Q1IHY3_KORVE         | 1 | Acidobacteria  | Acidobacteriia      | Candidatus Koribacter versatilis            |
| tr E8V6D1 E8V6D1_TERSS         | 1 | Acidobacteria  | Acidobacteriia      | Terriglobus saanensis                       |
| tr F4C5F7 F4C5F7_SPHS2         | 1 | Bacteroidetes  | Sphingobacteriia    | Sphingobacterium sp. 21                     |
| tr A0A0B6X0V1 A0A0B6X0V1_9BACT | 1 | Acidobacteria  |                     | Pyrinomonas methylaliphatoenes              |
| tr I2GM83 I2GM83_9BACT         | 1 | Bacteroidetes  | Cytophagia          | Fibrisoma limi                              |
| tr Q02BI0 Q02BI0_SOLUE         | 1 | Acidobacteria  | Solibacteres        | Candidatus Solibacter usitatus              |
| tr L0G5Y2 L0G5Y2_ECHVK         | 1 | Bacteroidetes  | Cytophagia          | Echinicola vietnamensis                     |



|                                |   |                 |                     |                                     |
|--------------------------------|---|-----------------|---------------------|-------------------------------------|
| tr I6ZXI2 I6ZXI2_MELRP         | 1 | Ignavibacteriae | Ignavibacteria      | Melioribacter roseus                |
| tr Q1PXQ9 Q1PXQ9_9BACT         | 1 | Planctomycetes  | Planctomycetia      | Candidatus Kuenenia stuttgartiensis |
| tr U2CPG0 U2CPG0_9BACE         | 1 | Bacteroidetes   | Bacteroidia         | Bacteroides pyogenes                |
| tr K1ZAX2 K1ZAX2_9BACT         | 1 |                 |                     | uncultured bacterium                |
| tr W5X224 W5X224_BDEBC         | 1 | Proteobacteria  | Deltaproteobacteria | Bdellovibrio bacteriovorus          |
| tr A0A098LE12 A0A098LE12_9BACT | 1 | Bacteroidetes   | Cytophagia          | Sporocytophaga myxococcoides        |
| tr G8NWH9 G8NWH9_GRAMM         | 1 | Acidobacteria   | Acidobacteriia      | Granulicella mallensis              |
| tr A0A0A8WWS4 A0A0A8WWS4_9DELT | 1 | Proteobacteria  | Deltaproteobacteria | Geobacter sp. OR-1                  |
| tr G8TBV3 G8TBV3_NIAKG         | 1 | Bacteroidetes   | Sphingobacteriia    | Niastella koreensis                 |
| tr J0LBB1 J0LBB1_9BACT         | 1 | Bacteroidetes   | Cytophagia          | Pontibacter sp. BAB1700             |
| tr F8EIQ2 F8EIQ2_RUNSL         | 1 | Bacteroidetes   | Cytophagia          | Runella slithyformis                |
| tr H8KQ18 H8KQ18_SOLCM         | 1 | Bacteroidetes   | Sphingobacteriia    | Solitalea canadensis                |
| tr E6QM46 E6QM46_9ZZZZ         | 1 |                 |                     | mine drainage metagenome            |
| tr C6VWY6 C6VWY6_DYAFD         | 1 | Bacteroidetes   | Cytophagia          | Dyadobacter fermentans              |
| tr A0A066WL26 A0A066WL26_9FLAO | 1 | Bacteroidetes   | Flavobacteriia      | Flavobacterium sp. EM1321           |
| tr Q11QT9 Q11QT9_CYTH3         | 1 | Bacteroidetes   | Cytophagia          | Cytophaga hutchinsonii              |
| tr H1YG72 H1YG72_9SPHI         | 1 | Bacteroidetes   | Sphingobacteriia    | Mucilaginibacter paludis            |
| tr A0A0C1U0Z5 A0A0C1U0Z5_9CYAN | 1 | Cyanobacteria   |                     | Hassallia byssoidea                 |
| tr G8TB64 G8TB64_NIAKG         | 1 | Bacteroidetes   | Sphingobacteriia    | Niastella koreensis                 |
| tr I4C8D1 I4C8D1_DESTA         | 1 | Proteobacteria  | Deltaproteobacteria | Desulfomonile tiedjei               |
| tr B9XI42 B9XI42_PEDPL         | 1 | Verrucomicrobia | Verrucomicrobiae    | Pedosphaera parvula                 |
| tr D7VTS5 D7VTS5_9SPHI         | 1 | Bacteroidetes   | Sphingobacteriia    | Sphingobacterium spiritivorum       |
| tr A0A083WVJ2 A0A083WVJ2_9FLAO | 1 | Bacteroidetes   | Flavobacteriia      | Chryseobacterium antarcticum        |
| tr H1XU60 H1XU60_9BACT         | 1 |                 |                     | Caldithrix abyssii                  |
| tr C7PRY9 C7PRY9_CHIPD         | 1 | Bacteroidetes   | Sphingobacteriia    | Chitinophaga pinensis               |
| tr I0AH89 I0AH89_IGNAJ         | 1 | Ignavibacteriae | Ignavibacteria      | Ignavibacterium album               |
| tr I6ZZU2 I6ZZU2_MELRP         | 1 | Ignavibacteriae | Ignavibacteria      | Melioribacter roseus                |

|                                |    |                  |                       |                                       |
|--------------------------------|----|------------------|-----------------------|---------------------------------------|
| tr J9ZBK3 J9ZBK3_LEPFM         | 1  | Nitrospirae      | Nitrospira            | Leptospirillum ferriphilum            |
| tr C0INF9 C0INF9_9BACT         | 1  |                  |                       | uncultured bacterium BLR12            |
| tr F4L5C0 F4L5C0_HALH1         | 1  | Bacteroidetes    | Sphingobacteriia      | Haliscomenobacter hydrossis           |
| tr G2SGS9 G2SGS9_RHOMR         | 1  | Bacteroidetes    |                       | Rhodothermus marinus                  |
| tr Q01T55 Q01T55_SOLUE         | 1  | Acidobacteria    | Solibacteres          | Candidatus Solibacter usitatus        |
| tr A5FBV3 A5FBV3_FLAJ1         | 1  | Bacteroidetes    | Flavobacteriia        | Flavobacterium johnsoniae             |
| tr A0A085EHM6 A0A085EHM6_9FLAO | 1  | Bacteroidetes    | Flavobacteriia        | Flavobacterium sp. EM1308             |
| tr W0RKP5 W0RKP5_9BACT         | 1  | Gemmatimonadetes | Gemmatimonadetes      | Gemmatimonadetes bacterium KBS708     |
| tr H2BUH3 H2BUH3_9FLAO         | 1  | Bacteroidetes    | Flavobacteriia        | Gillisia limnaea                      |
| tr A0A062XY82 A0A062XY82_9BACT | 1  | Acidobacteria    |                       | Thermoanaerobaculum aquaticum         |
| tr B3ELU9 B3ELU9_CHLPB         | 1  | Chlorobi         | Chlorobia             | Chlorobium phaeobacteroides           |
| tr W8F729 W8F729_9BACT         | 1  | Bacteroidetes    | Cytophagia            | Hymenobacter swuensis                 |
| tr M7NHF3 M7NHF3_9BACT         | 1  | Bacteroidetes    | Cytophagia            | Cesiribacter andamanensis             |
| tr C7PSE8 C7PSE8_CHIPD         | 1  | Bacteroidetes    | Sphingobacteriia      | Chitinophaga pinensis                 |
| tr F0S3N0 F0S3N0_DESTD         | 1  | Aquificae        | Aquificae             | Desulfurobacterium thermolithotrophum |
| tr C1DTQ3 C1DTQ3_SULAA         | 1  | Aquificae        | Aquificae             | Sulfurihydrogenibium azorense         |
| tr A6ECD4 A6ECD4_9SPHI         | 1  | Bacteroidetes    | Sphingobacteriia      | Pedobacter sp. BAL39                  |
| tr B4U8R4 B4U8R4_HYDS0         | 1  | Aquificae        | Aquificae             | Hydrogenobaculum sp. Y04AAS1          |
| tr A0A0C1KVI4 A0A0C1KVI4_9SPHI | 1  | Bacteroidetes    | Sphingobacteriia      | Flaviumibacter sp. ZG627              |
| tr G2DDR7 G2DDR7_9GAMM         | 1  | Proteobacteria   | Gammaproteobacteria   | endosymbiont of Riftia pachyptila     |
| tr G4WVV9 G4WVV9_9BACT         | 18 |                  |                       | uncultured bacterium CSLD10           |
| tr M7XAT5 M7XAT5_9BACT         | 1  | Bacteroidetes    | Cytophagia            | Mariniradius saccharolyticus          |
| tr A0A0C1KRV9 A0A0C1KRV9_9SPHI | 1  | Bacteroidetes    | Sphingobacteriia      | Flaviumibacter sp. ZG627              |
| tr A0LL26 A0LL26_SYNFM         | 1  | Proteobacteria   | Deltaproteobacteria   | Syntrophobacter fumaroxidans          |
| tr A0A099TQ66 A0A099TQ66_9HELI | 1  | Proteobacteria   | Epsilonproteobacteria | Helicobacter sp. MIT 11-5569          |
| tr V8CB90 V8CB90_9HELI         | 1  | Proteobacteria   | Epsilonproteobacteria | Helicobacter macacae                  |
| tr D3UJD6 D3UJD6_HELM1         | 1  | Proteobacteria   | Epsilonproteobacteria | Helicobacter mustelae                 |

|                                |   |                |                       |                                        |
|--------------------------------|---|----------------|-----------------------|----------------------------------------|
| tr A0A0B2EM49 A0A0B2EM49_HELPX | 1 | Proteobacteria | Epsilonproteobacteria | <i>Helicobacter pylori</i>             |
| tr T1CYV8 T1CYV8_9HELI         | 1 | Proteobacteria | Epsilonproteobacteria | <i>Helicobacter fennelliae</i>         |
| tr A0A099VAL0 A0A099VAL0_9HELI | 1 | Proteobacteria | Epsilonproteobacteria | <i>Helicobacter trogontum</i>          |
| tr M2YFM5 M2YFM5_9PSEU         | 2 | Actinobacteria | Actinobacteria        | <i>Amycolatopsis decaplanina</i>       |
| tr F3ZJE5 F3ZJE5_9ACTO         | 2 | Actinobacteria | Actinobacteria        | <i>Streptomyces</i> sp. Tu6071         |
| tr E2PY84 E2PY84_STRC2         | 1 | Actinobacteria | Actinobacteria        | <i>Streptomyces clavuligerus</i>       |
| tr A0A066Y802 A0A066Y802_9ACTO | 2 | Actinobacteria | Actinobacteria        | <i>Streptomyces olindensis</i>         |
| tr H6RMU7 H6RMU7_BLASD         | 2 | Actinobacteria | Actinobacteria        | <i>Blastococcus saxobsidens</i>        |
| tr D1A399 D1A399_THECD         | 2 | Actinobacteria | Actinobacteria        | <i>Thermomonospora curvata</i>         |
| tr D2PU99 D2PU99_KRIFD         | 2 | Actinobacteria | Actinobacteria        | <i>Kribbella flavida</i>               |
| tr E2SGA9 E2SGA9_9ACTO         | 1 | Actinobacteria | Actinobacteria        | <i>Aeromicrobium marinum</i>           |
| tr A0A0A1DGK3 A0A0A1DGK3_NOCSI | 2 | Actinobacteria | Actinobacteria        | <i>Pimelobacter simplex</i>            |
| tr V9XBJ1 V9XBJ1_9NOCA         | 2 | Actinobacteria | Actinobacteria        | <i>Rhodococcus pyridinivorans</i>      |
| tr A1SKI7 A1SKI7_NOCSJ         | 1 | Actinobacteria | Actinobacteria        | <i>Nocardioides</i> sp. JS614          |
| tr F6EHT5 F6EHT5_AMYSD         | 2 | Actinobacteria | Actinobacteria        | <i>Amycolicococcus subflavus</i>       |
| tr A0A022LT29 A0A022LT29_9ACTO | 2 | Actinobacteria | Actinobacteria        | <i>Dietzia</i> sp. UCD-THP             |
| tr D5UQ83 D5UQ83_TSUPD         | 2 | Actinobacteria | Actinobacteria        | <i>Tsukamurella paurometabola</i>      |
| tr E9UWC4 E9UWC4_9ACTO         | 1 | Actinobacteria | Actinobacteria        | <i>Nocardioideae bacterium Broad-1</i> |
| tr R7Y156 R7Y156_9ACTO         | 1 | Actinobacteria | Actinobacteria        | <i>Nocardioides</i> sp. CF8            |
| tr D3QB65 D3QB65_STANL         | 2 | Actinobacteria | Actinobacteria        | <i>Stackebrandtia nassauensis</i>      |
| tr C1BDE9 C1BDE9_RHOOB         | 2 | Actinobacteria | Actinobacteria        | <i>Rhodococcus opacus</i>              |
| tr T5HZF3 T5HZF3_RHOER         | 1 | Actinobacteria | Actinobacteria        | <i>Rhodococcus erythropolis</i>        |
| tr H5X8G2 H5X8G2_9PSEU         | 2 | Actinobacteria | Actinobacteria        | <i>Saccharomonospora marina</i>        |
| tr E2SEJ6 E2SEJ6_9ACTO         | 1 | Actinobacteria | Actinobacteria        | <i>Aeromicrobium marinum</i>           |
| tr G7GQS7 G7GQS7_9ACTO         | 1 | Actinobacteria | Actinobacteria        | <i>Gordonia amarae</i>                 |
| tr E2S875 E2S875_9ACTO         | 1 | Actinobacteria | Actinobacteria        | <i>Aeromicrobium marinum</i>           |
| tr A0R1K5 A0R1K5_MYCS2         | 2 | Actinobacteria | Actinobacteria        | <i>Mycobacterium smegmatis</i>         |

|                                |   |                |                |                                       |
|--------------------------------|---|----------------|----------------|---------------------------------------|
| tr M2XH03 M2XH03_9NOCA         | 2 | Actinobacteria | Actinobacteria | Rhodococcus triatomae                 |
| tr R7XXR3 R7XXR3_9ACTO         | 2 | Actinobacteria | Actinobacteria | Nocardioides sp. CF8                  |
| tr E6JDS5 E6JDS5_9ACTO         | 1 | Actinobacteria | Actinobacteria | Dietzia cinnamea                      |
| tr L7KG85 L7KG85_9ACTO         | 2 | Actinobacteria | Actinobacteria | Gordonia aichiensis                   |
| tr F8B413 F8B413_FRADG         | 2 | Actinobacteria | Actinobacteria | Frankia symbiont of Datisca glomerata |
| tr A0A076N0Q6 A0A076N0Q6_AMYME | 1 | Actinobacteria | Actinobacteria | Amycolatopsis methanolica             |
| tr A0A076EAH3 A0A076EAH3_RHOOP | 1 | Actinobacteria | Actinobacteria | Rhodococcus opacus                    |
| tr E9V0Y8 E9V0Y8_9ACTO         | 1 | Actinobacteria | Actinobacteria | Nocardioideaceae bacterium Broad-1    |
| tr A0A051UJJ6 A0A051UJJ6_MYCTX | 2 | Actinobacteria | Actinobacteria | Mycobacterium tuberculosis            |
| tr V7JUV1 V7JUV1_MYCPC         | 2 | Actinobacteria | Actinobacteria | Mycobacterium avium                   |
| tr I7FLI0 I7FLI0_MYCS2         | 1 | Actinobacteria | Actinobacteria | Mycobacterium smegmatis               |
| tr L7KCE3 L7KCE3_GORRU         | 2 | Actinobacteria | Actinobacteria | Gordonia rubripertincta               |
| tr A0QMJ3 A0QMJ3_MYCA1         | 1 | Actinobacteria | Actinobacteria | Mycobacterium avium                   |
| tr G7GKE5 G7GKE5_9ACTO         | 2 | Actinobacteria | Actinobacteria | Gordonia amarae                       |
| tr G7GSR2 G7GSR2_9ACTO         | 1 | Actinobacteria | Actinobacteria | Gordonia amarae                       |
| tr A0A0A1DJ08 A0A0A1DJ08_NOCSI | 1 | Actinobacteria | Actinobacteria | Pimelobacter simplex                  |
| tr M0QIE3 M0QIE3_9ACTO         | 2 | Actinobacteria | Actinobacteria | Gordonia soli                         |
| tr A0A0A1DPF3 A0A0A1DPF3_NOCSI | 1 | Actinobacteria | Actinobacteria | Pimelobacter simplex                  |
| tr H5X5Q9 H5X5Q9_9PSEU         | 2 | Actinobacteria | Actinobacteria | Saccharomonospora marina              |
| tr V8CVU7 V8CVU7_9ACTO         | 1 | Actinobacteria | Actinobacteria | Williamsia sp. D3                     |
| tr E9UWP2 E9UWP2_9ACTO         | 2 | Actinobacteria | Actinobacteria | Nocardioideaceae bacterium Broad-1    |
| tr W5TBZ3 W5TBZ3_9NOCA         | 1 | Actinobacteria | Actinobacteria | Nocardia nova                         |
| tr H0R664 H0R664_9ACTO         | 1 | Actinobacteria | Actinobacteria | Gordonia effusa                       |
| tr H6R4G2 H6R4G2_NOCCG         | 1 | Actinobacteria | Actinobacteria | Nocardia cyriacigeorgica              |
| tr E2SCQ9 E2SCQ9_9ACTO         | 1 | Actinobacteria | Actinobacteria | Aeromicrobium marinum                 |
| tr W5TF23 W5TF23_9NOCA         | 1 | Actinobacteria | Actinobacteria | Nocardia nova                         |
| tr Q0S3I4 Q0S3I4_RHOJR         | 2 | Actinobacteria | Actinobacteria | Rhodococcus jostii                    |

|                                |   |                |                |                                |
|--------------------------------|---|----------------|----------------|--------------------------------|
| tr A0A0B8NHK4 A0A0B8NHK4_9NOCA | 2 | Actinobacteria | Actinobacteria | Nocardia seriolae              |
| tr A0A0C2VT22 A0A0C2VT22_RHOER | 2 | Actinobacteria | Actinobacteria | Rhodococcus erythropolis       |
| tr W5TJG0 W5TJG0_9NOCA         | 1 | Actinobacteria | Actinobacteria | Nocardia nova                  |
| tr A0A088DKD4 A0A088DKD4_MYCAV | 1 | Actinobacteria | Actinobacteria | Mycobacterium avium            |
| tr L8DBZ0 L8DBZ0_9NOCA         | 1 | Actinobacteria | Actinobacteria | Rhodococcus sp. AW25M09        |
| tr A0A073B2F2 A0A073B2F2_9PSEU | 2 | Actinobacteria | Actinobacteria | Saccharopolyspora rectivirgula |
| tr G7GTT3 G7GTT3_9ACTO         | 1 | Actinobacteria | Actinobacteria | Gordonia amarae                |
| tr M2VE22 M2VE22_9NOCA         | 1 | Actinobacteria | Actinobacteria | Rhodococcus triatomae          |
| tr H5U070 H5U070_9ACTO         | 2 | Actinobacteria | Actinobacteria | Gordonia sputi                 |
| tr K6XRH0 K6XRH0_9ACTO         | 1 | Actinobacteria | Actinobacteria | Gordonia namibiensis           |
| tr F5Z0C0 F5Z0C0_MYCSD         | 1 | Actinobacteria | Actinobacteria | Mycobacterium sp. JDM601       |
| tr X8EUF9 X8EUF9_MYCCH         | 1 | Actinobacteria | Actinobacteria | Mycobacterium chelonae         |
| tr L8DK68 L8DK68_9NOCA         | 1 | Actinobacteria | Actinobacteria | Rhodococcus sp. AW25M09        |
| tr H0QWF8 H0QWF8_9ACTO         | 1 | Actinobacteria | Actinobacteria | Gordonia effusa                |
| tr D5UP36 D5UP36_TSUPD         | 1 | Actinobacteria | Actinobacteria | Tsukamurella paurometabola     |
| tr X8AND8 X8AND8_MYCAV         | 6 | Actinobacteria | Actinobacteria | Mycobacterium avium            |
| tr D5UYS0 D5UYS0_TSUPD         | 1 | Actinobacteria | Actinobacteria | Tsukamurella paurometabola     |
| tr H6MXF1 H6MXF1_GORPV         | 1 | Actinobacteria | Actinobacteria | Gordonia polyisoprenivorans    |
| tr D5UW65 D5UW65_TSUPD         | 1 | Actinobacteria | Actinobacteria | Tsukamurella paurometabola     |
| tr K6VQS7 K6VQS7_9ACTO         | 1 | Actinobacteria | Actinobacteria | Gordonia namibiensis           |
| tr H5UAB4 H5UAB4_9ACTO         | 1 | Actinobacteria | Actinobacteria | Gordonia terrae                |
| tr F6EN11 F6EN11_AMYSD         | 1 | Actinobacteria | Actinobacteria | Amycolicoccus subflavus        |
| tr L7KVP1 L7KVP1_9ACTO         | 1 | Actinobacteria | Actinobacteria | Gordonia amicalis              |
| tr K5B990 K5B990_9MYCO         | 1 | Actinobacteria | Actinobacteria | Mycobacterium hassiacum        |
| tr R7XXT4 R7XXT4_9ACTO         | 1 | Actinobacteria | Actinobacteria | Nocardioides sp. CF8           |
| tr L7LAC8 L7LAC8_9ACTO         | 1 | Actinobacteria | Actinobacteria | Gordonia hirsuta               |
| tr R7XYT4 R7XYT4_9ACTO         | 1 | Actinobacteria | Actinobacteria | Nocardioides sp. CF8           |

|                                |    |                |                |                                 |
|--------------------------------|----|----------------|----------------|---------------------------------|
| tr X8CS24 X8CS24_MYCIT         | 12 | Actinobacteria | Actinobacteria | Mycobacterium intracellulare    |
| tr A0A098BQC5 A0A098BQC5_9NOCA | 1  | Actinobacteria | Actinobacteria | Rhodococcus ruber               |
| tr E9V0Z1 E9V0Z1_9ACTO         | 1  | Actinobacteria | Actinobacteria | Nocardioideae bacterium Broad-1 |
| tr H0QWP0 H0QWP0_9ACTO         | 1  | Actinobacteria | Actinobacteria | Gordonia effusa                 |
| tr A0A076MVD4 A0A076MVD4_AMYME | 1  | Actinobacteria | Actinobacteria | Amycolatopsis methanolica       |
| tr R7Y2Z7 R7Y2Z7_9ACTO         | 1  | Actinobacteria | Actinobacteria | Gordonia terrae                 |
| tr H0RGF2 H0RGF2_9ACTO         | 1  | Actinobacteria | Actinobacteria | Gordonia polyisoprenivorans     |
| tr I0PGQ2 I0PGQ2_MYCAB         | 1  | Actinobacteria | Actinobacteria | Mycobacterium abscessus         |
| tr D2B9V7 D2B9V7_STRRD         | 1  | Actinobacteria | Actinobacteria | Streptosporangium roseum        |
| tr G7GP52 G7GP52_9ACTO         | 2  | Actinobacteria | Actinobacteria | Gordonia amarae                 |
| tr L7KU47 L7KU47_9ACTO         | 1  | Actinobacteria | Actinobacteria | Gordonia amicalis               |
| tr H5X5Q6 H5X5Q6_9PSEU         | 1  | Actinobacteria | Actinobacteria | Saccharomonospora marina        |
| tr W5TGX9 W5TGX9_9NOCA         | 1  | Actinobacteria | Actinobacteria | Nocardia nova                   |
| tr G7GP48 G7GP48_9ACTO         | 1  | Actinobacteria | Actinobacteria | Gordonia amarae                 |
| tr Q5YVH2 Q5YVH2_NOCEA         | 1  | Actinobacteria | Actinobacteria | Nocardia farcinica              |
| tr W7STV8 W7STV8_9PSEU         | 1  | Actinobacteria | Actinobacteria | Kutzneria sp. 744               |
| tr F5Z0B7 F5Z0B7_MYCSD         | 1  | Actinobacteria | Actinobacteria | Mycobacterium sp. JDM601        |
| tr D3QB62 D3QB62_STANL         | 1  | Actinobacteria | Actinobacteria | Stackebrandtia nassauensis      |
| tr K0EUQ9 K0EUQ9_9NOCA         | 1  | Actinobacteria | Actinobacteria | Nocardia brasiliensis           |
| tr H0RG52 H0RG52_9ACTO         | 1  | Actinobacteria | Actinobacteria | Gordonia polyisoprenivorans     |
| tr A0A076MRM1 A0A076MRM1_AMYME | 1  | Actinobacteria | Actinobacteria | Amycolatopsis methanolica       |
| tr H6MXF4 H6MXF4_GORPV         | 1  | Actinobacteria | Actinobacteria | Gordonia polyisoprenivorans     |
| tr R4LVY7 R4LVY7_MYCTX         | 6  | Actinobacteria | Actinobacteria | Mycobacterium tuberculosis      |
| tr G8RXW6 G8RXW6_MYCRN         | 1  | Actinobacteria | Actinobacteria | Mycobacterium rhodesiae         |
| tr Q0S3I6 Q0S3I6_RHOJR         | 6  | Actinobacteria | Actinobacteria | Rhodococcus jostii              |
| tr H6R8W6 H6R8W6_NOCCG         | 1  | Actinobacteria | Actinobacteria | Nocardia cyriacigeorgica        |
| tr H0ITI3 H0ITI3_MYCAB         | 1  | Actinobacteria | Actinobacteria | Mycobacterium abscessus         |

|                                |   |                 |                       |                                      |
|--------------------------------|---|-----------------|-----------------------|--------------------------------------|
| tr V2PWJ5 V2PWJ5_9BACT         | 1 | Deferribacteres | Deferribacteres       | Mucispirillum schaedleri             |
| tr D3PEB4 D3PEB4_DEFDS         | 1 | Deferribacteres | Deferribacteres       | Deferribacter desulfuricans          |
| tr A0A068JLF4 A0A068JLF4_9DELT | 1 | Proteobacteria  | Deltaproteobacteria   | Desulfonatronum thiodismutans        |
| tr B3E1S0 B3E1S0_GEOLS         | 1 | Proteobacteria  | Deltaproteobacteria   | Geobacter lovleyi                    |
| tr A5GF79 A5GF79_GEOUR         | 1 | Proteobacteria  | Deltaproteobacteria   | Geobacter uraniireducens             |
| tr D5CSN6 D5CSN6_SIDLE         | 1 | Proteobacteria  | Betaproteobacteria    | Sideroxydans lithotrophicus          |
| tr B5YHU7 B5YHU7_THEYD         | 1 | Nitrospirae     | Nitrospira            | Thermodesulfovibrio yellowstonii     |
| tr A0A099UEX8 A0A099UEX8_9HELI | 1 | Proteobacteria  | Epsilonproteobacteria | Helicobacter typhlonius              |
| tr K1YVS7 K1YVS7_9BACT         | 1 |                 |                       | uncultured bacterium                 |
| tr M4VAD6 M4VAD6_9DELT         | 1 | Proteobacteria  | Deltaproteobacteria   | Bdellovibrio exovorus                |
| tr D4H824 D4H824_DENA2         | 1 | Deferribacteres | Deferribacteres       | Denitrovibrio acetiphilus            |
| tr H8N0I9 H8N0I9_CORCM         | 1 | Proteobacteria  | Deltaproteobacteria   | Coralloccoccus coralloides           |
| tr T0RH11 T0RH11_9DELT         | 1 | Proteobacteria  | Deltaproteobacteria   | Bacteriovorax sp. Seq25_V            |
| tr E6W1R4 E6W1R4_DESIS         | 1 | Chrysiogenetes  | Chrysiogenetes        | Desulfurispirillum indicum           |
| tr D0LYW5 D0LYW5_HALO1         | 1 | Proteobacteria  | Deltaproteobacteria   | Haliangium ochraceum                 |
| tr S4Y647 S4Y647_SORCE         | 1 | Proteobacteria  | Deltaproteobacteria   | Sorangium cellulosum                 |
| tr Q7MS05 Q7MS05_WOLSU         | 1 | Proteobacteria  | Epsilonproteobacteria | Wolinella succinogenes               |
| tr A6Q4N4 A6Q4N4_NITSB         | 1 | Proteobacteria  | Epsilonproteobacteria | Nitratiruptor sp. SB155-2            |
| tr K2AF75 K2AF75_9BACT         | 1 |                 |                       | uncultured bacterium                 |
| tr K7S285 K7S285_9HELI         | 1 | Proteobacteria  | Epsilonproteobacteria | Candidatus Sulfuricurvum sp. RIFRC-1 |
| tr A0A017TC91 A0A017TC91_9DELT | 1 | Proteobacteria  | Deltaproteobacteria   | Chondromyces apiculatus              |
| tr F5YBC2 F5YBC2_TREAZ         | 1 | Spirochaetes    | Spirochaetia          | Treponema azotonutricium             |
| tr A6DA65 A6DA65_9PROT         | 1 | Proteobacteria  | Epsilonproteobacteria | Caminibacter mediatlanticus          |
| tr A0A094WAV2 A0A094WAV2_9BACT | 1 | Nitrospirae     | Nitrospira            | Leptospirillum ferriphilum           |
| tr F8F156 F8F156_TRECH         | 1 | Spirochaetes    | Spirochaetia          | Treponema caldaria                   |
| tr V2QE64 V2QE64_9BACT         | 1 | Deferribacteres | Deferribacteres       | Mucispirillum schaedleri             |
| tr C0QRE9 C0QRE9_PERMH         | 1 | Aquificae       | Aquificae             | Persephonella marina                 |

|                                |   |                  |                       |                                   |
|--------------------------------|---|------------------|-----------------------|-----------------------------------|
| tr A7HBT5 A7HBT5_ANADF         | 1 | Proteobacteria   | Deltaproteobacteria   | Anaeromyxobacter sp. Fw109-5      |
| tr A0A0C2ZVP4 A0A0C2ZVP4_9HELI | 1 | Proteobacteria   | Epsilonproteobacteria | Sulfuricurvum sp. PC08-66         |
| tr U2HVI4 U2HVI4_9SPHI         | 1 | Bacteroidetes    | Sphingobacteriia      | Sphingobacterium paucimobilis     |
| tr C1AA19 C1AA19_GEMAT         | 1 | Gemmatimonadetes | Gemmatimonadetes      | Gemmatimonas aurantiaca           |
| tr E1R9E4 E1R9E4_SPISS         | 1 | Spirochaetes     | Spirochaetia          | Spirochaeta smaragdinae           |
| tr J0L7H8 J0L7H8_9HELI         | 1 | Proteobacteria   | Epsilonproteobacteria | Thiovulum sp. ES                  |
| tr A0A0C2YZI5 A0A0C2YZI5_9PROT | 1 | Proteobacteria   | Epsilonproteobacteria | Sulfurovum sp. AS07-7             |
| tr A0A075KNH8 A0A075KNH8_9FIRM | 1 | Firmicutes       | Negativicutes         | Pelosinus sp. UFO1                |
| tr Q0EZD4 Q0EZD4_9PROT         | 1 | Proteobacteria   | Zetaproteobacteria    | Mariprofundus ferrooxydans        |
| tr K4IK87 K4IK87_PSYTT         | 1 | Bacteroidetes    | Flavobacteriia        | Psychroflexus torquis             |
| tr E4T8S3 E4T8S3_PALPW         | 1 | Bacteroidetes    | Bacteroidia           | Paludibacter propionicigenes      |
| tr A0A078TMF9 A0A078TMF9_9PORP | 1 | Bacteroidetes    | Bacteroidia           | Parabacteroides distasonis        |
| tr V6DIG3 V6DIG3_9DELT         | 1 | Proteobacteria   | Deltaproteobacteria   | Candidatus Babela massiliensis    |
| tr H3KA77 H3KA77_9FIRM         | 1 | Firmicutes       | Negativicutes         | Megamonas funiformis              |
| tr K2DP81 K2DP81_9BACT         | 1 |                  |                       | uncultured bacterium              |
| tr W0SHT2 W0SHT2_9RHO0         | 1 | Proteobacteria   | Betaproteobacteria    | Sulfuritalea hydrogenivorans      |
| tr B3U4T4 B3U4T4_9BACT         | 1 | Nitrospirae      | Nitrospira            | Candidatus Nitrospira defluvii    |
| tr C6I0D1 C6I0D1_9BACT         | 1 | Nitrospirae      | Nitrospira            | Leptospirillum ferrodiazotrophum  |
| tr J3CHC9 J3CHC9_9FLAO         | 1 | Bacteroidetes    | Flavobacteriia        | Chryseobacterium sp. CF314        |
| tr R5W525 R5W525_9BACT         | 1 | Bacteroidetes    | Bacteroidia           | Alistipes sp. CAG:53              |
| tr H9UKN8 H9UKN8_SPIAZ         | 1 | Spirochaetes     | Spirochaetia          | Spirochaeta africana              |
| tr A0A085B811 A0A085B811_9FLAO | 1 | Bacteroidetes    | Flavobacteriia        | Epilithonimonas lactis            |
| tr W6M797 W6M797_9GAMM         | 1 | Proteobacteria   | Gammaproteobacteria   | Candidatus Contendobacter odensis |
| tr A6G1B9 A6G1B9_9DELT         | 6 | Proteobacteria   | Deltaproteobacteria   | Plesiocystis pacifica             |
| tr D9PM45 D9PM45_9ZZZZ         | 1 |                  |                       | sediment metagenome               |
| tr K1LKK0 K1LKK0_9BACT         | 1 | Bacteroidetes    | Cytophagia            | Cecembia lonarensis               |
| tr A0A0C1RTA3 A0A0C1RTA3_9BACT | 1 | Verrucomicrobia  |                       | Methylacidiphilum kamchatkense    |



|                                |   |                |                     |                             |
|--------------------------------|---|----------------|---------------------|-----------------------------|
| tr U5BSD5 U5BSD5_9BACT         | 1 | Bacteroidetes  | Cytophagia          | Rhodonellum psychrophilum   |
| tr A0A017SZP8 A0A017SZP8_9DELT | 1 | Proteobacteria | Deltaproteobacteria | Chondromyces apiculatus     |
| tr R5WR07 R5WR07_9BACT         | 1 | Bacteroidetes  | Bacteroidia         | Alistipes sp. CAG:157       |
| tr F0SQW1 F0SQW1_PLABD         | 1 | Planctomycetes | Planctomycetia      | Planctomyces brasiliensis   |
| tr A0A034UBF2 A0A034UBF2_9NOCA | 1 | Actinobacteria | Actinobacteria      | Nocardia brasiliensis       |
| tr L8DDJ3 L8DDJ3_9NOCA         | 1 | Actinobacteria | Actinobacteria      | Rhodococcus sp. AW25M09     |
| tr L7LDF5 L7LDF5_9ACTO         | 1 | Actinobacteria | Actinobacteria      | Gordonia hirsuta            |
| tr L7LBL5 L7LBL5_9ACTO         | 1 | Actinobacteria | Actinobacteria      | Gordonia hirsuta            |
| tr H0QWP2 H0QWP2_9ACTO         | 1 | Actinobacteria | Actinobacteria      | Gordonia effusa             |
| tr H0RLY8 H0RLY8_9ACTO         | 1 | Actinobacteria | Actinobacteria      | Gordonia polyisoprenivorans |
| tr H0R4X5 H0R4X5_9ACTO         | 1 | Actinobacteria | Actinobacteria      | Gordonia effusa             |
| tr W5TH26 W5TH26_9NOCA         | 1 | Actinobacteria | Actinobacteria      | Nocardia nova               |
| tr R4UX48 R4UX48_MYCAB         | 1 | Actinobacteria | Actinobacteria      | Mycobacterium abscessus     |
| tr G8RXW8 G8RXW8_MYCRN         | 1 | Actinobacteria | Actinobacteria      | Mycobacterium rhodesiae     |
| tr E5XTR0 E5XTR0_9ACTO         | 1 | Actinobacteria | Actinobacteria      | Segniliparus rugosus        |
| tr U5E6V1 U5E6V1_NOCAS         | 1 | Actinobacteria | Actinobacteria      | Nocardia asteroides         |
| tr F6ERP1 F6ERP1_AMYSD         | 1 | Actinobacteria | Actinobacteria      | Amycolicococcus subflavus   |
| tr J9SRZ1 J9SRZ1_9ACTO         | 1 | Actinobacteria | Actinobacteria      | Gordonia sp. KTR9           |
| tr D5UW66 D5UW66_TSUPD         | 6 | Actinobacteria | Actinobacteria      | Tsukamurella paurometabola  |
| tr A0A0C1DBV2 A0A0C1DBV2_9NOCA | 1 | Actinobacteria | Actinobacteria      | Nocardia vulneris           |
| tr E5XS62 E5XS62_9ACTO         | 1 | Actinobacteria | Actinobacteria      | Segniliparus rugosus        |
| tr H0R405 H0R405_9ACTO         | 1 | Actinobacteria | Actinobacteria      | Gordonia effusa             |
| tr H6R4F1 H6R4F1_NOCCG         | 1 | Actinobacteria | Actinobacteria      | Nocardia cyriacigeorgica    |
| tr W5TK72 W5TK72_9NOCA         | 1 | Actinobacteria | Actinobacteria      | Nocardia nova               |
| tr H5UG92 H5UG92_9ACTO         | 1 | Actinobacteria | Actinobacteria      | Gordonia terrae             |
| tr I0P732 I0P732_MYCAB         | 1 | Actinobacteria | Actinobacteria      | Mycobacterium abscessus     |
| tr H0QWG0 H0QWG0_9ACTO         | 1 | Actinobacteria | Actinobacteria      | Gordonia effusa             |

|                                |   |                |                |                                   |
|--------------------------------|---|----------------|----------------|-----------------------------------|
| tr G7GQQ7 G7GQQ7_9ACTO         | 1 | Actinobacteria | Actinobacteria | Gordonia amarae                   |
| tr Q5YVH0 Q5YVH0_NOCF          | 1 | Actinobacteria | Actinobacteria | Nocardia farcinica                |
| tr U5EI33 U5EI33_NOCAS         | 1 | Actinobacteria | Actinobacteria | Nocardia asteroides               |
| tr G7H7G0 G7H7G0_9ACTO         | 1 | Actinobacteria | Actinobacteria | Gordonia araii                    |
| tr D5UP34 D5UP34_TSUPD         | 1 | Actinobacteria | Actinobacteria | Tsukamurella paurometabola        |
| tr L7LEA8 L7LEA8_9ACTO         | 1 | Actinobacteria | Actinobacteria | Gordonia hirsuta                  |
| tr G7GSP9 G7GSP9_9ACTO         | 1 | Actinobacteria | Actinobacteria | Gordonia amarae                   |
| tr X5LBT5 X5LBT5_9MYCO         | 1 | Actinobacteria | Actinobacteria | Mycobacterium vulneris            |
| tr L8DAF2 L8DAF2_9NOCA         | 2 | Actinobacteria | Actinobacteria | Rhodococcus sp. AW25M09           |
| tr H0ITI5 H0ITI5_MYCAB         | 1 | Actinobacteria | Actinobacteria | Mycobacterium abscessus           |
| tr A0A0B8NLH2 A0A0B8NLH2_9NOCA | 1 | Actinobacteria | Actinobacteria | Nocardia seriolae                 |
| tr D5UYR8 D5UYR8_TSUPD         | 1 | Actinobacteria | Actinobacteria | Tsukamurella paurometabola        |
| tr H0RG54 H0RG54_9ACTO         | 1 | Actinobacteria | Actinobacteria | Gordonia polyisoprenivorans       |
| tr K6XAK4 K6XAK4_9ACTO         | 1 | Actinobacteria | Actinobacteria | Gordonia namibiensis              |
| tr A0A0A1DKY3 A0A0A1DKY3_NOCSI | 2 | Actinobacteria | Actinobacteria | Pimelobacter simplex              |
| tr W7S8N6 W7S8N6_9PSEU         | 2 | Actinobacteria | Actinobacteria | Kutzneria sp. 744                 |
| tr G4HXY5 G4HXY5_MYCRH         | 1 | Actinobacteria | Actinobacteria | Mycobacterium rhodesiae           |
| tr W5WJZ9 W5WJZ9_9PSEU         | 1 | Actinobacteria | Actinobacteria | Kutzneria albida                  |
| tr Q0SD31 Q0SD31_RHOJR         | 1 | Actinobacteria | Actinobacteria | Rhodococcus jostii                |
| tr H0R662 H0R662_9ACTO         | 1 | Actinobacteria | Actinobacteria | Gordonia effusa                   |
| tr R1I6Y7 R1I6Y7_9PSEU         | 1 | Actinobacteria | Actinobacteria | Amycolatopsis vancoresmycina      |
| tr K6WXK8 K6WXK8_9ACTO         | 1 | Actinobacteria | Actinobacteria | Gordonia namibiensis              |
| tr N1M1R1 N1M1R1_9NOCA         | 1 | Actinobacteria | Actinobacteria | Rhodococcus sp. EsD8              |
| tr D3QB63 D3QB63_STANL         | 1 | Actinobacteria | Actinobacteria | Stackebrandtia nassauensis        |
| tr W5TKJ6 W5TKJ6_9NOCA         | 1 | Actinobacteria | Actinobacteria | Nocardia nova                     |
| tr Q82B08 Q82B08_STRAW         | 1 | Actinobacteria | Actinobacteria | Streptomyces avermitilis          |
| tr E9UWP4 E9UWP4_9ACTO         | 1 | Actinobacteria | Actinobacteria | Nocardioidaceae bacterium Broad-1 |

|                                |   |                |                |                                       |
|--------------------------------|---|----------------|----------------|---------------------------------------|
| tr X8AC78 X8AC78_MYCAV         | 6 | Actinobacteria | Actinobacteria | Mycobacterium avium                   |
| tr A0A049DVU2 A0A049DVU2_MYCAV | 1 | Actinobacteria | Actinobacteria | Mycobacterium avium                   |
| tr A0A076N4G4 A0A076N4G4_AMYME | 2 | Actinobacteria | Actinobacteria | Amycolatopsis methanolica             |
| tr E2SCQ7 E2SCQ7_9ACTO         | 1 | Actinobacteria | Actinobacteria | Aeromicrobium marinum                 |
| tr W5TSW7 W5TSW7_9NOCA         | 2 | Actinobacteria | Actinobacteria | Nocardia nova                         |
| tr L7KJL2 L7KJL2_9ACTO         | 1 | Actinobacteria | Actinobacteria | Gordonia aichiensis                   |
| tr X8C805 X8C805_MYCXE         | 1 | Actinobacteria | Actinobacteria | Mycobacterium xenopi                  |
| tr E6S9N7 E6S9N7_INTC7         | 2 | Actinobacteria | Actinobacteria | Intrasporangium calvum                |
| tr U5EJN4 U5EJN4_NOCAS         | 1 | Actinobacteria | Actinobacteria | Nocardia asteroides                   |
| tr H6RMU9 H6RMU9_BLASD         | 2 | Actinobacteria | Actinobacteria | Blastococcus saxobsidens              |
| tr A0A076MUX5 A0A076MUX5_AMYME | 2 | Actinobacteria | Actinobacteria | Amycolatopsis methanolica             |
| tr N1MJ19 N1MJ19_9NOCA         | 1 | Actinobacteria | Actinobacteria | Rhodococcus sp. EsD8                  |
| tr C1B3R9 C1B3R9_RHOOB         | 2 | Actinobacteria | Actinobacteria | Rhodococcus opacus                    |
| tr L7L8J5 L7L8J5_9ACTO         | 1 | Actinobacteria | Actinobacteria | Gordonia hirsuta                      |
| tr G7GKG5 G7GKG5_9ACTO         | 1 | Actinobacteria | Actinobacteria | Gordonia amarae                       |
| tr H0R5E0 H0R5E0_9ACTO         | 2 | Actinobacteria | Actinobacteria | Gordonia effusa                       |
| tr E2S873 E2S873_9ACTO         | 1 | Actinobacteria | Actinobacteria | Aeromicrobium marinum                 |
| tr G7GSR4 G7GSR4_9ACTO         | 1 | Actinobacteria | Actinobacteria | Gordonia amarae                       |
| tr F8B412 F8B412_FRADG         | 2 | Actinobacteria | Actinobacteria | Frankia symbiont of Datisca glomerata |
| tr E9SXF7 E9SXF7_RHOHA         | 1 | Actinobacteria | Actinobacteria | Rhodococcus equi                      |
| tr H5TSA9 H5TSA9_9ACTO         | 1 | Actinobacteria | Actinobacteria | Gordonia otitidis                     |
| tr C6WH36 C6WH36_ACTMD         | 1 | Actinobacteria | Actinobacteria | Actinosynnema mirum                   |
| tr D9UW72 D9UW72_9ACTO         | 1 | Actinobacteria | Actinobacteria | Streptomyces sp. AA4                  |
| tr H5X5Q7 H5X5Q7_9PSEU         | 1 | Actinobacteria | Actinobacteria | Saccharomonospora marina              |
| tr G7GP49 G7GP49_9ACTO         | 1 | Actinobacteria | Actinobacteria | Gordonia amarae                       |
| tr E6JBI1 E6JBI1_9ACTO         | 1 | Actinobacteria | Actinobacteria | Dietzia cinnamomea                    |
| tr A0A0B2BNA9 A0A0B2BNA9_9ACTO | 1 | Actinobacteria | Actinobacteria | Mumia flava                           |

|                                |   |                |                     |                                |
|--------------------------------|---|----------------|---------------------|--------------------------------|
| tr X7ZQS1 X7ZQS1_MYCKA         | 1 | Actinobacteria | Actinobacteria      | Mycobacterium kansasii         |
| tr W8HIN5 W8HIN5_RHOOP         | 2 | Actinobacteria | Actinobacteria      | Rhodococcus opacus             |
| tr E6JDS7 E6JDS7_9ACTO         | 2 | Actinobacteria | Actinobacteria      | Dietzia cinnamena              |
| tr T1VIH4 T1VIH4_RHOER         | 1 | Actinobacteria | Actinobacteria      | Rhodococcus erythropolis       |
| tr D1AD48 D1AD48_THECD         | 1 | Actinobacteria | Actinobacteria      | Thermomonospora curvata        |
| tr A1SKI9 A1SKI9_NOCSI         | 1 | Actinobacteria | Actinobacteria      | Nocardiooides sp. JS614        |
| tr B5H0E3 B5H0E3_STRC2         | 1 | Actinobacteria | Actinobacteria      | Streptomyces clavuligerus      |
| tr A0A0A1DIP0 A0A0A1DIP0_NOCSI | 1 | Actinobacteria | Actinobacteria      | Pimelobacter simplex           |
| tr L7LGC5 L7LGC5_9ACTO         | 1 | Actinobacteria | Actinobacteria      | Gordonia sihwensis             |
| tr H5XA18 H5XA18_9PSEU         | 2 | Actinobacteria | Actinobacteria      | Saccharomonospora marina       |
| tr D1A3I8 D1A3I8_THECD         | 1 | Actinobacteria | Actinobacteria      | Thermomonospora curvata        |
| tr A0A0A1DK44 A0A0A1DK44_NOCSI | 1 | Actinobacteria | Actinobacteria      | Pimelobacter simplex           |
| tr E2SCQ6 E2SCQ6_9ACTO         | 1 | Actinobacteria | Actinobacteria      | Aeromicrobium marinum          |
| tr G7GSR5 G7GSR5_9ACTO         | 1 | Actinobacteria | Actinobacteria      | Gordonia amarae                |
| tr M2VIV3 M2VIV3_9NOCA         | 1 | Actinobacteria | Actinobacteria      | Rhodococcus triatomae          |
| tr D5P4I7 D5P4I7_9MYCO         | 1 | Actinobacteria | Actinobacteria      | Mycobacterium parascrofulaceum |
| tr X7Z6I4 X7Z6I4_MYCKA         | 1 | Actinobacteria | Actinobacteria      | Mycobacterium kansasii         |
| tr E1QEH6 E1QEH6_DESB2         | 1 | Proteobacteria | Deltaproteobacteria | Desulfarculus baarsii          |
| tr A0A091F962 A0A091F962_9DELT | 1 | Proteobacteria | Deltaproteobacteria | Smithella sp. SCADC            |
| tr G4FMK9 G4FMK9_9SYNE         | 1 | Cyanobacteria  |                     | Synechococcus sp. WH 8016      |
| tr B5IQJ6 B5IQJ6_9CHRO         | 1 | Cyanobacteria  |                     | Cyanobium sp. PCC 7001         |
| tr A2C0C3 A2C0C3_PROM1         | 1 | Cyanobacteria  |                     | Prochlorococcus marinus        |
| tr A0A0A2AM06 A0A0A2AM06_PROMR | 1 | Cyanobacteria  |                     | Prochlorococcus marinus        |
| tr A0A0A2BW26 A0A0A2BW26_9PROC | 1 | Cyanobacteria  |                     | Prochlorococcus sp. MIT 0602   |
| tr A5GQG4 A5GQG4_SYNR3         | 1 | Cyanobacteria  |                     | Synechococcus sp. RCC307       |
| tr Q5N2W8 Q5N2W8_SYNP6         | 1 | Cyanobacteria  |                     | Synechococcus elongatus        |
| tr K9SH59 K9SH59_9CYAN         | 1 | Cyanobacteria  |                     | Pseudanabaena sp. PCC 7367     |

|                                |   |                |                |                                                  |
|--------------------------------|---|----------------|----------------|--------------------------------------------------|
| tr Q2JUB0 Q2JUB0_SYNJA         | 1 | Cyanobacteria  |                | Synechococcus sp. JA-3-3Ab                       |
| tr B4WJN6 B4WJN6_9SYNE         | 1 | Cyanobacteria  |                | Synechococcus sp. PCC 7335                       |
| tr U5DIK0 U5DIK0_9CHRO         | 1 | Cyanobacteria  |                | Rubidibacter lacunae                             |
| tr K9Y9N2 K9Y9N2_HALP7         | 1 | Cyanobacteria  |                | Halotheca sp. PCC 7418                           |
| tr K9T3H1 K9T3H1_9CYAN         | 1 | Cyanobacteria  |                | Pleurocapsa minor                                |
| tr K9XQV7 K9XQV7_STAC7         | 1 | Cyanobacteria  |                | Stanieria cyanosphaera                           |
| tr K9W8T4 K9W8T4_9CYAN         | 1 | Cyanobacteria  |                | Microcoleus sp. PCC 7113                         |
| tr B7KB83 B7KB83_CYAP7         | 1 | Cyanobacteria  |                | Cyanothece sp. PCC 7424                          |
| tr K9RWX8 K9RWX8_SYN3          | 1 | Cyanobacteria  |                | Synechococcus sp. PCC 6312                       |
| tr L8MSA2 L8MSA2_9CYAN         | 1 | Cyanobacteria  |                | Pseudanabaena biceps                             |
| tr B0C226 B0C226_ACAM1         | 1 | Cyanobacteria  |                | Acaryochloris marina                             |
| tr B8HTP7 B8HTP7_CYAP4         | 1 | Cyanobacteria  |                | Cyanothece sp. PCC 7425                          |
| tr A0A077JDZ5 A0A077JDZ5_9CYAN | 1 | Cyanobacteria  |                | cyanobacterium endosymbiont of Epithemia turgida |
| tr H1WM06 H1WM06_9CYAN         | 1 | Cyanobacteria  |                | Arthrospira sp. PCC 8005                         |
| tr K8GQV7 K8GQV7_9CYAN         | 1 | Cyanobacteria  |                | Oscillatoriales cyanobacterium JSC-12            |
| tr U9VTS0 U9VTS0_9CYAN         | 1 | Cyanobacteria  |                | Leptolyngbya sp. Heron Island J                  |
| tr A0A0C1TAB8 A0A0C1TAB8_9CHRO | 1 | Cyanobacteria  |                | Aphanocapsa montana                              |
| tr D1A3I5 D1A3I5_THECD         | 1 | Actinobacteria | Actinobacteria | Thermomonospora curvata                          |
| tr D1AD45 D1AD45_THECD         | 1 | Actinobacteria | Actinobacteria | Thermomonospora curvata                          |
| tr W5TQP4 W5TQP4_9NOCA         | 1 | Actinobacteria | Actinobacteria | Nocardia nova                                    |
| tr F6ERN9 F6ERN9_AMYSD         | 1 | Actinobacteria | Actinobacteria | Amycolicococcus subflavus                        |
| tr G7GSQ1 G7GSQ1_9ACTO         | 1 | Actinobacteria | Actinobacteria | Gordonia amarae                                  |
| tr A0A0C1DRH0 A0A0C1DRH0_9NOCA | 1 | Actinobacteria | Actinobacteria | Nocardia vulneris                                |
| tr I0P730 I0P730_MYCAB         | 1 | Actinobacteria | Actinobacteria | Mycobacterium abscessus                          |
| tr L7LB86 L7LB86_9ACTO         | 1 | Actinobacteria | Actinobacteria | Gordonia hirsuta                                 |
| tr H0R403 H0R403_9ACTO         | 1 | Actinobacteria | Actinobacteria | Gordonia effusa                                  |
| tr G7GY04 G7GY04_9ACTO         | 1 | Actinobacteria | Actinobacteria | Gordonia araii                                   |

|                                |   |                |                |                              |
|--------------------------------|---|----------------|----------------|------------------------------|
| tr J9SBI8 J9SBI8_9ACTO         | 1 | Actinobacteria | Actinobacteria | Gordonia sp. KTR9            |
| tr A0A0B8NCI5 A0A0B8NCI5_9NOCA | 1 | Actinobacteria | Actinobacteria | Nocardia seriolae            |
| tr N1M7R1 N1M7R1_9NOCA         | 1 | Actinobacteria | Actinobacteria | Rhodococcus sp. EsD8         |
| tr H0R5M6 H0R5M6_9ACTO         | 1 | Actinobacteria | Actinobacteria | Gordonia effusa              |
| tr H0QYS0 H0QYS0_9ACTO         | 1 | Actinobacteria | Actinobacteria | Gordonia effusa              |
| tr G7GQQ5 G7GQQ5_9ACTO         | 1 | Actinobacteria | Actinobacteria | Gordonia amarae              |
| tr A0A024LYA0 A0A024LYA0_9MYCO | 1 | Actinobacteria | Actinobacteria | Mycobacterium farcinogenes   |
| tr F5YRK0 F5YRK0_MYCSD         | 1 | Actinobacteria | Actinobacteria | Mycobacterium sp. JDM601     |
| tr E5XS64 E5XS64_9ACTO         | 1 | Actinobacteria | Actinobacteria | Segniliparus rugosus         |
| tr G7H7G2 G7H7G2_9ACTO         | 1 | Actinobacteria | Actinobacteria | Gordonia araii               |
| tr H0R4X3 H0R4X3_9ACTO         | 1 | Actinobacteria | Actinobacteria | Gordonia effusa              |
| tr W5WKH5 W5WKH5_9PSEU         | 1 | Actinobacteria | Actinobacteria | Kutzneria albida             |
| tr A1SKJ0 A1SKJ0_NOCSJ         | 1 | Actinobacteria | Actinobacteria | Nocardioides sp. JS614       |
| tr D6AF89 D6AF89_STRFL         | 1 | Actinobacteria | Actinobacteria | Streptomyces filamentosus    |
| tr M2XNH7 M2XNH7_9NOCA         | 1 | Actinobacteria | Actinobacteria | Rhodococcus qingshengii      |
| tr E6JDS8 E6JDS8_9ACTO         | 1 | Actinobacteria | Actinobacteria | Dietzia cinnamea             |
| tr D5UQ86 D5UQ86_TSUPD         | 1 | Actinobacteria | Actinobacteria | Tsukamurella paurometabola   |
| tr E2SEJ9 E2SEJ9_9ACTO         | 1 | Actinobacteria | Actinobacteria | Aeromicrobium marinum        |
| tr H0QWP3 H0QWP3_9ACTO         | 1 | Actinobacteria | Actinobacteria | Gordonia effusa              |
| tr I2AD27 I2AD27_9MYCO         | 2 | Actinobacteria | Actinobacteria | Mycobacterium sp. MOTT36Y    |
| tr L7LAW1 L7LAW1_9ACTO         | 1 | Actinobacteria | Actinobacteria | Gordonia hirsuta             |
| tr F4CXJ6 F4CXJ6_PSEUX         | 1 | Actinobacteria | Actinobacteria | Pseudonocardia dioxanivorans |
| tr K6WGW0 K6WGW0_9ACTO         | 1 | Actinobacteria | Actinobacteria | Gordonia namibiensis         |
| tr A0A098BQD0 A0A098BQD0_9NOCA | 1 | Actinobacteria | Actinobacteria | Rhodococcus ruber            |
| tr L7LDI1 L7LDI1_9ACTO         | 1 | Actinobacteria | Actinobacteria | Gordonia hirsuta             |
| tr H0RK29 H0RK29_9ACTO         | 1 | Actinobacteria | Actinobacteria | Gordonia polyisoprenivorans  |
| tr L7L8H2 L7L8H2_9ACTO         | 1 | Actinobacteria | Actinobacteria | Gordonia hirsuta             |

|                                |   |                |                  |                                                               |
|--------------------------------|---|----------------|------------------|---------------------------------------------------------------|
| tr F8B411 F8B411_FRADG         | 1 | Actinobacteria | Actinobacteria   | Frankia symbiont of <i>Datisca glomerata</i>                  |
| tr W4A9M2 W4A9M2_RHORH         | 2 | Actinobacteria | Actinobacteria   | <i>Rhodococcus rhodochrous</i>                                |
| tr W9DNC4 W9DNC4_9PSEU         | 1 | Actinobacteria | Actinobacteria   | <i>Amycolatopsis halophila</i>                                |
| tr M2XC84 M2XC84_9NOCA         | 1 | Actinobacteria | Actinobacteria   | <i>Rhodococcus triatomae</i>                                  |
| tr A0A0A1DT20 A0A0A1DT20_NOCSI | 1 | Actinobacteria | Actinobacteria   | <i>Pimelobacter simplex</i>                                   |
| tr D2B9W1 D2B9W1_STRRD         | 2 | Actinobacteria | Actinobacteria   | <i>Streptosporangium roseum</i>                               |
| tr E5XTQ9 E5XTQ9_9ACTO         | 1 | Actinobacteria | Actinobacteria   | <i>Segniliparus rugosus</i>                                   |
| tr A0A0C1DA60 A0A0C1DA60_9NOCA | 1 | Actinobacteria | Actinobacteria   | <i>Nocardia vulneris</i>                                      |
| tr K0P2I7 K0P2I7_9BACT         | 1 | Bacteroidetes  | Cytophagia       | <i>Cardinium</i> endosymbiont of <i>Encarsia pergandiella</i> |
| tr B3ES33 B3ES33_AMOA5         | 1 | Bacteroidetes  | Cytophagia       | <i>Candidatus Amoebophilus asiaticus</i>                      |
| tr I4AGD9 I4AGD9_FLELS         | 1 | Bacteroidetes  | Cytophagia       | <i>Flexibacter litoralis</i>                                  |
| tr M7NKI7 M7NKI7_9BACT         | 1 | Bacteroidetes  | Cytophagia       | <i>Cesiribacter andamanensis</i>                              |
| tr A0A098L870 A0A098L870_9BACT | 1 | Bacteroidetes  | Cytophagia       | <i>Sporocytophaga myxococcoides</i>                           |
| tr F8EK33 F8EK33_RUNSL         | 1 | Bacteroidetes  | Cytophagia       | <i>Runella slithyformis</i>                                   |
| tr J1FGV0 J1FGV0_9BACT         | 1 | Bacteroidetes  | Cytophagia       | <i>Pontibacter</i> sp. BAB1700                                |
| tr A0A081PD39 A0A081PD39_9SPHI | 1 | Bacteroidetes  | Sphingobacteriia | <i>Sphingobacterium antarcticum</i>                           |
| tr A1ZPY6 A1ZPY6_9BACT         | 1 | Bacteroidetes  | Cytophagia       | <i>Microscilla marina</i>                                     |
| tr E4TVH0 E4TVH0_MARTH         | 1 | Bacteroidetes  | Cytophagia       | <i>Marivirga tractuosa</i>                                    |
| tr I0KE54 I0KE54_9BACT         | 1 | Bacteroidetes  | Cytophagia       | <i>Fibrella aestuarina</i>                                    |
| tr R7HMZ6 R7HMZ6_9BACT         | 1 | Bacteroidetes  | Bacteroidia      | <i>Prevotella</i> sp. CAG:279                                 |
| tr T2NDF6 T2NDF6_PORGN         | 1 | Bacteroidetes  | Bacteroidia      | <i>Porphyromonas gingivalis</i>                               |
| tr I2EQY5 I2EQY5_EMTOG         | 1 | Bacteroidetes  | Cytophagia       | <i>Emticicia oligotrophica</i>                                |
| tr A0A099WU86 A0A099WU86_PORCN | 1 | Bacteroidetes  | Bacteroidia      | <i>Porphyromonas cangingivalis</i>                            |
| tr R5AQU5 R5AQU5_9BACT         | 1 | Bacteroidetes  | Bacteroidia      | <i>Prevotella</i> sp. CAG:1031                                |
| tr G5HA61 G5HA61_9BACT         | 1 | Bacteroidetes  | Bacteroidia      | <i>Alistipes indistinctus</i>                                 |
| tr G8R7C0 G8R7C0_OWEHD         | 1 | Bacteroidetes  | Flavobacteriia   | <i>Owenweeksia hongkongensis</i>                              |
| tr C7PH47 C7PH47_CHIPD         | 1 | Bacteroidetes  | Sphingobacteriia | <i>Chitinophaga pinensis</i>                                  |

|                                |   |               |                  |                                             |
|--------------------------------|---|---------------|------------------|---------------------------------------------|
| tr A0A0A2EHY2 A0A0A2EHY2_9PORP | 1 | Bacteroidetes | Bacteroidia      | Porphyromonadaceae bacterium COT-184 OH4590 |
| tr F5IW51 F5IW51_9PORP         | 1 | Bacteroidetes | Bacteroidia      | Dysgonomonas gadei                          |
| tr F2KZG4 F2KZG4_PREDF         | 1 | Bacteroidetes | Bacteroidia      | Prevotella denticola                        |
| tr Q11X28 Q11X28_CYTH3         | 1 | Bacteroidetes | Cytophagia       | Cytophaga hutchinsonii                      |
| tr A0A090VSQ0 A0A090VSQ0_9FLAO | 1 | Bacteroidetes | Flavobacteriia   | Jejuia pallidilutea                         |
| tr A0A0A2E7S6 A0A0A2E7S6_9PORP | 1 | Bacteroidetes | Bacteroidia      | Porphyromonas macacae                       |
| tr A0A0C1XY96 A0A0C1XY96_9CYAN | 1 | Cyanobacteria |                  | Hassallia byssoidea                         |
| tr L1MNU8 L1MNU8_9BACT         | 1 | Bacteroidetes | Bacteroidia      | Prevotella sp. oral taxon 473               |
| tr S8GQX7 S8GQX7_9BACT         | 1 | Bacteroidetes |                  | Bacteroidetes bacterium oral taxon 272      |
| tr G9S299 G9S299_9PORP         | 1 | Bacteroidetes | Bacteroidia      | Tannerella sp. 6_1_58FAA_CT1                |
| tr H1H6W3 H1H6W3_9FLAO         | 1 | Bacteroidetes | Flavobacteriia   | Myroides odoratimimus                       |
| tr R5P0D2 R5P0D2_9PORP         | 1 | Bacteroidetes | Bacteroidia      | Odoribacter sp. CAG:788                     |
| tr F8N780 F8N780_9BACT         | 1 | Bacteroidetes | Bacteroidia      | Prevotella multisaccharivorax               |
| tr A0A0A2N285 A0A0A2N285_9FLAO | 1 | Bacteroidetes | Flavobacteriia   | Flavobacterium subsaxonicum                 |
| tr X5DME2 X5DME2_9BACT         | 1 | Bacteroidetes | Bacteroidia      | Draconibacterium orientale                  |
| tr A0A069ZPF2 A0A069ZPF2_9PORP | 1 | Bacteroidetes | Bacteroidia      | Porphyromonas sp. KLE 1280                  |
| tr A0A0A2FVJ7 A0A0A2FVJ7_9PORP | 1 | Bacteroidetes | Bacteroidia      | Porphyromonas sp. COT-108 OH2963            |
| tr A0A0A2DUW2 A0A0A2DUW2_9PORP | 1 | Bacteroidetes | Bacteroidia      | Porphyromonas sp. COT-239 OH1446            |
| tr R5GCB1 R5GCB1_9PORP         | 1 | Bacteroidetes | Bacteroidia      | Porphyromonas sp. CAG:1061                  |
| tr I4A1W8 I4A1W8_ORNRL         | 1 | Bacteroidetes | Flavobacteriia   | Ornithobacterium rhinotracheale             |
| tr A0A0A2F3F9 A0A0A2F3F9_9PORP | 1 | Bacteroidetes | Bacteroidia      | Porphyromonas sp. COT-290 OH860             |
| tr H8KQS8 H8KQS8_SOLCM         | 1 | Bacteroidetes | Sphingobacteriia | Solitalea canadensis                        |
| tr C0BK49 C0BK49_FLABM         | 1 | Bacteroidetes | Flavobacteriia   | Flavobacteria bacterium MS024-2A            |
| tr H5SGK0 H5SGK0_9BACT         | 1 | Bacteroidetes |                  | uncultured Bacteroidetes bacterium          |
| tr R7EV28 R7EV28_9BACT         | 1 | Bacteroidetes | Bacteroidia      | Prevotella sp. CAG:485                      |
| tr F0NYE7 F0NYE7_WEEVC         | 1 | Bacteroidetes | Flavobacteriia   | Weeksella virosa                            |
| tr A0A0C1IWJ7 A0A0C1IWJ7_9SPHI | 1 | Bacteroidetes | Sphingobacteriia | Flaviumibacter solisilvae                   |



|                                |   |               |                  |                                     |
|--------------------------------|---|---------------|------------------|-------------------------------------|
| tr A0A085L335 A0A085L335_9FLAO | 1 | Bacteroidetes | Flavobacteriia   | Schleiferia thermophila             |
| tr I3YYY0 I3YYY0_AEQU          | 1 | Bacteroidetes | Flavobacteriia   | Aequorivita sublithicola            |
| tr G8TKE0 G8TKE0_NIAKG         | 1 | Bacteroidetes | Sphingobacteriia | Niastella koreensis                 |
| tr A0A076HT00 A0A076HT00_9BACT | 1 | Bacteroidetes | Cytophagia       | Hymenobacter sp. APR13              |
| tr R5NYV3 R5NYV3_9BACT         | 1 | Bacteroidetes | Bacteroidia      | Paraprevotella clara CAG:116        |
| tr T0L699 T0L699_9BACT         | 1 |               |                  | candidate division Zixibacteria     |
| tr A0A060RBB0 A0A060RBB0_9BACT | 1 | Bacteroidetes | Bacteroidia      | Mucinivorans hirudinis              |
| tr A0A0B7IDH7 A0A0B7IDH7_9FLAO | 1 | Bacteroidetes | Flavobacteriia   | Capnocytophaga canimorsus           |
| tr A0A084THK3 A0A084THK3_9FLAO | 1 | Bacteroidetes | Flavobacteriia   | Mangrovimonas yunxiaonensis         |
| tr I0W9H7 I0W9H7_9FLAO         | 1 | Bacteroidetes | Flavobacteriia   | Imtechella halotolerans             |
| tr H8XQU0 H8XQU0_FLAIG         | 1 | Bacteroidetes | Flavobacteriia   | Flavobacterium indicum              |
| tr C3J8P0 C3J8P0_9PORP         | 1 | Bacteroidetes | Bacteroidia      | Porphyromonas endodontalis          |
| tr K2PTK0 K2PTK0_9FLAO         | 1 | Bacteroidetes | Flavobacteriia   | Galbibacter marinus                 |
| tr C6WZS1 C6WZS1_FLAB3         | 1 | Bacteroidetes | Flavobacteriia   | Flavobacteriaceae bacterium 3519-10 |
| tr A9DWR2 A9DWR2_9FLAO         | 1 | Bacteroidetes | Flavobacteriia   | Kordia algicida                     |
| tr S2W8N2 S2W8N2_9FLAO         | 1 | Bacteroidetes | Flavobacteriia   | Capnocytophaga granulosa            |
| tr W8VXU7 W8VXU7_9FLAO         | 1 | Bacteroidetes | Flavobacteriia   | Nonlabens marinus                   |
| tr A0A098RZV5 A0A098RZV5_9SPHI | 1 | Bacteroidetes | Sphingobacteriia | Phaeodactylibacter xiamenensis      |
| tr F2IBN3 F2IBN3_FLUTR         | 1 | Bacteroidetes | Flavobacteriia   | Fluviicola taffensis                |
| tr F4KKC0 F4KKC0_PORAD         | 1 | Bacteroidetes | Bacteroidia      | Porphyromonas asaccharolytica       |
| tr W4PGU6 W4PGU6_9BACE         | 1 | Bacteroidetes | Bacteroidia      | Bacteroides pyogenes                |
| tr A0M1W6 A0M1W6_GRAFK         | 1 | Bacteroidetes | Flavobacteriia   | Gramella forsetii                   |
| tr A0A0A2GBH2 A0A0A2GBH2_9PORP | 1 | Bacteroidetes | Bacteroidia      | Porphyromonas gingivicanis          |
| tr D0MEJ5 D0MEJ5_RHOM4         | 1 | Bacteroidetes |                  | Rhodothermus marinus                |
| tr W7YFG6 W7YFG6_9BACT         | 1 | Bacteroidetes | Bacteroidia      | Saccharicrinis fermentans           |
| tr H1XUM8 H1XUM8_9BACT         | 1 |               |                  | Caldithrix abyssii                  |
| tr W0F9G9 W0F9G9_9SPHI         | 1 | Bacteroidetes | Sphingobacteriia | Niabella soli                       |

|                                |   |                  |                     |                                        |
|--------------------------------|---|------------------|---------------------|----------------------------------------|
| tr A0A099Y3B0 A0A099Y3B0_9FLAO | 1 | Bacteroidetes    | Flavobacteriia      | Polaribacter sp. Hell_85               |
| tr K1Y202 K1Y202_9BACT         | 1 |                  |                     | uncultured bacterium                   |
| tr R5HZE0 R5HZE0_9BACT         | 1 | Bacteroidetes    | Bacteroidia         | Alistipes sp. CAG:831                  |
| tr R5SG86 R5SG86_9BACE         | 1 | Bacteroidetes    | Bacteroidia         | Bacteroides sp. CAG:545                |
| tr B0VIY3 B0VIY3_CLOAI         | 1 | Cloacimonetes    |                     | Candidatus Cloacimonas acidaminovorans |
| tr C9RPE4 C9RPE4_FIBSS         | 1 | Fibrobacteres    | Fibrobacteria       | Fibrobacter succinogenes               |
| tr J114E7 J114E7_9SPHI         | 1 | Bacteroidetes    | Sphingobacteriia    | Saprospira grandis                     |
| tr F4KW20 F4KW20_HALH1         | 1 | Bacteroidetes    | Sphingobacteriia    | Haliscomenobacter hydrossis            |
| tr D5HC85 D5HC85_SALRM         | 1 | Bacteroidetes    |                     | Salinibacter ruber                     |
| tr A0A095YWT5 A0A095YWT5_9FIRM | 1 | Firmicutes       | Clostridia          | Clostridiales bacterium S5-A11         |
| tr W0RMM3 W0RMM3_9BACT         | 1 | Gemmatimonadetes | Gemmatimonadetes    | Gemmatimonadetes bacterium KBS708      |
| tr A0A0A6QVG1 A0A0A6QVG1_9GAMM | 1 | Proteobacteria   | Gammaproteobacteria | Methylomonas denitrificans             |
| tr J3GHZ5 J3GHZ5_9PSED         | 1 | Proteobacteria   | Gammaproteobacteria | Pseudomonas sp. GM55                   |
| tr F2LVU5 F2LVU5_HIPMA         | 1 | Proteobacteria   | Deltaproteobacteria | Hippea maritima                        |
| tr F2NDZ2 F2NDZ2_DESAR         | 1 | Proteobacteria   | Deltaproteobacteria | Desulfobacca acetoxidans               |
| tr W0SFH4 W0SFH4_9RHOO         | 1 | Proteobacteria   | Betaproteobacteria  | Sulfuritalea hydrogenivorans           |
| tr I4C465 I4C465_DESTA         | 1 | Proteobacteria   | Deltaproteobacteria | Desulfomonile tiedjei                  |
| tr A0A080QB06 A0A080QB06_9GAMM | 1 | Proteobacteria   | Gammaproteobacteria | Francisella philomiragia               |
| tr E1YET2 E1YET2_9DELT         | 1 | Proteobacteria   | Deltaproteobacteria | uncultured Desulfobacterium sp.        |
| tr A8ZWW9 A8ZWW9_DESOH         | 1 | Proteobacteria   | Deltaproteobacteria | Desulfococcus oleovorans               |
| tr A0A017TF38 A0A017TF38_9DELT | 1 | Proteobacteria   | Deltaproteobacteria | Chondromyces apiculatus                |
| tr E2SEJ8 E2SEJ8_9ACTO         | 1 | Actinobacteria   | Actinobacteria      | Aeromicrobium marinum                  |
| tr F6EN09 F6EN09_9AMYSD        | 1 | Actinobacteria   | Actinobacteria      | Amycolicococcus subflavus              |
| tr E9UWC6 E9UWC6_9ACTO         | 2 | Actinobacteria   | Actinobacteria      | Nocardioideae bacterium Broad-1        |
| tr K5B7D8 K5B7D8_9MYCO         | 1 | Actinobacteria   | Actinobacteria      | Mycobacterium hassiacum                |
| tr U0EGC3 U0EGC3_9NOCA         | 1 | Actinobacteria   | Actinobacteria      | Rhodococcus sp. P27                    |
| tr A0A0A1DLZ1 A0A0A1DLZ1_NOCSI | 1 | Actinobacteria   | Actinobacteria      | Pimelobacter simplex                   |

|                                |   |                |                     |                               |
|--------------------------------|---|----------------|---------------------|-------------------------------|
| tr D2B9W0 D2B9W0_STRRD         | 1 | Actinobacteria | Actinobacteria      | Streptosporangium roseum      |
| tr X7XVT8 X7XVT8_MYCKA         | 2 | Actinobacteria | Actinobacteria      | Mycobacterium kansasii        |
| tr F6EHT2 F6EHT2_AMYSD         | 1 | Actinobacteria | Actinobacteria      | Amycolicococcus subflavus     |
| tr G7GUZ5 G7GUZ5_9ACTO         | 1 | Actinobacteria | Actinobacteria      | Gordonia amarae               |
| tr G7GMN9 G7GMN9_9ACTO         | 1 | Actinobacteria | Actinobacteria      | Gordonia amarae               |
| tr C6XKM3 C6XKM3_HIRBI         | 1 | Proteobacteria | Alphaproteobacteria | Hirschia baltica              |
| tr A3VIP4 A3VIP4_9RHOB         | 1 | Proteobacteria | Alphaproteobacteria | Maritimibacter alkaliphilus   |
| tr Q2RRK6 Q2RRK6_RHORT         | 1 | Proteobacteria | Alphaproteobacteria | Rhodospirillum rubrum         |
| tr A0A0B8RJ17 A0A0B8RJ17_9PROT | 1 | Proteobacteria | Alphaproteobacteria | alpha proteobacterium U9-1i   |
| tr M2TAX0 M2TAX0_9PROT         | 1 | Proteobacteria | Alphaproteobacteria | alpha proteobacterium JLT2015 |
| tr K9H4S2 K9H4S2_9PROT         | 1 | Proteobacteria | Alphaproteobacteria | Caenispirillum salinarum      |
| tr A0A023D5F6 A0A023D5F6_ACIMT | 1 | Proteobacteria | Alphaproteobacteria | Acidomonas methanolica        |
| tr H6MXF2 H6MXF2_GORPV         | 1 | Actinobacteria | Actinobacteria      | Gordonia polyisoprenivorans   |
| tr I0P731 I0P731_MYCAB         | 1 | Actinobacteria | Actinobacteria      | Mycobacterium abscessus       |
| tr W5TL33 W5TL33_9NOCA         | 1 | Actinobacteria | Actinobacteria      | Nocardia nova                 |
| tr H5U1P3 H5U1P3_9ACTO         | 1 | Actinobacteria | Actinobacteria      | Gordonia sputi                |
| tr W5TJN0 W5TJN0_9NOCA         | 1 | Actinobacteria | Actinobacteria      | Nocardia nova                 |
| tr A0A0C1DEH2 A0A0C1DEH2_9NOCA | 1 | Actinobacteria | Actinobacteria      | Nocardia vulneris             |
| tr W5THK6 W5THK6_9NOCA         | 1 | Actinobacteria | Actinobacteria      | Nocardia nova                 |
| tr U5ECQ1 U5ECQ1_NOCAS         | 1 | Actinobacteria | Actinobacteria      | Nocardia asteroides           |
| tr K0ERB3 K0ERB3_9NOCA         | 1 | Actinobacteria | Actinobacteria      | Nocardia brasiliensis         |
| tr F6ERP0 F6ERP0_AMYSD         | 1 | Actinobacteria | Actinobacteria      | Amycolicococcus subflavus     |
| tr D5UYR9 D5UYR9_TSUPD         | 1 | Actinobacteria | Actinobacteria      | Tsukamurella paurometabola    |
| tr E5XS63 E5XS63_9ACTO         | 1 | Actinobacteria | Actinobacteria      | Segniliparus rugosus          |
| tr L7KUZ4 L7KUZ4_9ACTO         | 1 | Actinobacteria | Actinobacteria      | Gordonia amicalis             |
| tr N1LYM3 N1LYM3_9NOCA         | 1 | Actinobacteria | Actinobacteria      | Rhodococcus sp. EsD8          |
| tr H0RG53 H0RG53_9ACTO         | 1 | Actinobacteria | Actinobacteria      | Gordonia polyisoprenivorans   |

|                                |   |                 |                  |                                       |
|--------------------------------|---|-----------------|------------------|---------------------------------------|
| tr A0A0B8NBH4 A0A0B8NBH4_9NOCA | 1 | Actinobacteria  | Actinobacteria   | Nocardia seriolae                     |
| tr L7LCD4 L7LCD4_9ACTO         | 1 | Actinobacteria  | Actinobacteria   | Gordonia hirsuta                      |
| tr L7KV49 L7KV49_9ACTO         | 1 | Actinobacteria  | Actinobacteria   | Gordonia amicalis                     |
| tr H0I724 H0I724_MYCAB         | 1 | Actinobacteria  | Actinobacteria   | Mycobacterium abscessus               |
| tr H0IT14 H0IT14_MYCAB         | 1 | Actinobacteria  | Actinobacteria   | Mycobacterium abscessus               |
| tr H0R404 H0R404_9ACTO         | 1 | Actinobacteria  | Actinobacteria   | Gordonia effusa                       |
| tr B4CTT9 B4CTT9_9BACT         | 1 | Verrucomicrobia | Spartobacteria   | Chthoniobacter flavus                 |
| tr R6JAY2 R6JAY2_9BACT         | 1 | Verrucomicrobia | Verrucomicrobiae | Akkermansia muciniphila CAG:154       |
| tr H0E5Y0 H0E5Y0_9ACTN         | 1 | Actinobacteria  | Actinobacteria   | Patulibacter medicamentivorans        |
| tr D3F0X5 D3F0X5_CONWI         | 1 | Actinobacteria  | Actinobacteria   | Conexibacter woesei                   |
| tr H0E7I0 H0E7I0_9ACTN         | 1 | Actinobacteria  | Actinobacteria   | Patulibacter medicamentivorans        |
| tr H0E9E6 H0E9E6_9ACTN         | 1 | Actinobacteria  | Actinobacteria   | Patulibacter medicamentivorans        |
| tr H0E5I8 H0E5I8_9ACTN         | 1 | Actinobacteria  | Actinobacteria   | Patulibacter medicamentivorans        |
| tr H0E614 H0E614_9ACTN         | 1 | Actinobacteria  | Actinobacteria   | Patulibacter medicamentivorans        |
| tr H0E8D2 H0E8D2_9ACTN         | 1 | Actinobacteria  | Actinobacteria   | Patulibacter medicamentivorans        |
| tr H0EAY3 H0EAY3_9ACTN         | 1 | Actinobacteria  | Actinobacteria   | Patulibacter medicamentivorans        |
| tr A0A0B5F8Q2 A0A0B5F8Q2_9ACTO | 1 | Actinobacteria  | Actinobacteria   | Streptomyces albus                    |
| tr H0E7N8 H0E7N8_9ACTN         | 1 | Actinobacteria  | Actinobacteria   | Patulibacter medicamentivorans        |
| tr A0A076MQZ1 A0A076MQZ1_AMYME | 2 | Actinobacteria  | Actinobacteria   | Amycolatopsis methanolica             |
| tr E9USY6 E9USY6_9ACTO         | 1 | Actinobacteria  | Actinobacteria   | Nocardioidaceae bacterium Broad-1     |
| tr H0E8D1 H0E8D1_9ACTN         | 1 | Actinobacteria  | Actinobacteria   | Patulibacter medicamentivorans        |
| tr D3F0X4 D3F0X4_CONWI         | 1 | Actinobacteria  | Actinobacteria   | Conexibacter woesei                   |
| tr H0E7H6 H0E7H6_9ACTN         | 1 | Actinobacteria  | Actinobacteria   | Patulibacter medicamentivorans        |
| tr H0E7N4 H0E7N4_9ACTN         | 6 | Actinobacteria  | Actinobacteria   | Patulibacter medicamentivorans        |
| tr A0A076MKB1 A0A076MKB1_AMYME | 1 | Actinobacteria  | Actinobacteria   | Amycolatopsis methanolica             |
| tr F8AY50 F8AY50_FRADG         | 1 | Actinobacteria  | Actinobacteria   | Frankia symbiont of Datisca glomerata |
| tr H0E5K6 H0E5K6_9ACTN         | 1 | Actinobacteria  | Actinobacteria   | Patulibacter medicamentivorans        |

|                                |   |                |                |                                |
|--------------------------------|---|----------------|----------------|--------------------------------|
| tr H0E5N8 H0E5N8_9ACTN         | 1 | Actinobacteria | Actinobacteria | Patulibacter medicamentivorans |
| tr H0E5I7 H0E5I7_9ACTN         | 1 | Actinobacteria | Actinobacteria | Patulibacter medicamentivorans |
| tr D3F0X8 D3F0X8_CONWI         | 1 | Actinobacteria | Actinobacteria | Conexibacter woesei            |
| tr D3F0X9 D3F0X9_CONWI         | 2 | Actinobacteria | Actinobacteria | Conexibacter woesei            |
| tr H0E5K4 H0E5K4_9ACTN         | 1 | Actinobacteria | Actinobacteria | Patulibacter medicamentivorans |
| tr H0E5N9 H0E5N9_9ACTN         | 1 | Actinobacteria | Actinobacteria | Patulibacter medicamentivorans |
| tr H0E7N5 H0E7N5_9ACTN         | 1 | Actinobacteria | Actinobacteria | Patulibacter medicamentivorans |
| tr H0EAM8 H0EAM8_9ACTN         | 1 | Actinobacteria | Actinobacteria | Patulibacter medicamentivorans |
| tr H0E6M8 H0E6M8_9ACTN         | 1 | Actinobacteria | Actinobacteria | Patulibacter medicamentivorans |
| tr S7HTJ1 S7HTJ1_9FIRM         | 6 | Firmicutes     | Negativicutes  | Megasphaera sp. NM10           |
| tr G7GSQ2 G7GSQ2_9ACTO         | 1 | Actinobacteria | Actinobacteria | Gordonia amarae                |
| tr F6ERN8 F6ERN8_AMYSD         | 1 | Actinobacteria | Actinobacteria | Amycolicococcus subflavus      |
| tr H6R8W7 H6R8W7_NOCCG         | 1 | Actinobacteria | Actinobacteria | Nocardia cyriacigeorgica       |
| tr A0A0B8NB36 A0A0B8NB36_9NOCA | 1 | Actinobacteria | Actinobacteria | Nocardia seriolae              |
| tr W5TKU5 W5TKU5_9NOCA         | 1 | Actinobacteria | Actinobacteria | Nocardia nova                  |
| tr W5TMJ9 W5TMJ9_9NOCA         | 1 | Actinobacteria | Actinobacteria | Nocardia nova                  |
| tr I0P729 I0P729_MYCAB         | 1 | Actinobacteria | Actinobacteria | Mycobacterium abscessus        |
| tr D5UW64 D5UW64_TSUPD         | 1 | Actinobacteria | Actinobacteria | Tsukamurella paurometabola     |
| tr H0QWF7 H0QWF7_9ACTO         | 1 | Actinobacteria | Actinobacteria | Gordonia effusa                |
| tr H0R402 H0R402_9ACTO         | 1 | Actinobacteria | Actinobacteria | Gordonia effusa                |
| tr N1M6W3 N1M6W3_9NOCA         | 1 | Actinobacteria | Actinobacteria | Rhodococcus sp. EsD8           |
| tr Q5YVH3 Q5YVH3_NOCFA         | 1 | Actinobacteria | Actinobacteria | Nocardia farcinica             |
| tr H0RLY4 H0RLY4_9ACTO         | 1 | Actinobacteria | Actinobacteria | Gordonia polyisoprenivorans    |
| tr H5UG95 H5UG95_9ACTO         | 1 | Actinobacteria | Actinobacteria | Gordonia terrae                |
| tr X5LYS7 X5LYS7_9MYCO         | 1 | Actinobacteria | Actinobacteria | Mycobacterium vulneris         |
| tr J9S7Z6 J9S7Z6_9ACTO         | 1 | Actinobacteria | Actinobacteria | Gordonia sp. KTR9              |
| tr H0QWN9 H0QWN9_9ACTO         | 1 | Actinobacteria | Actinobacteria | Gordonia effusa                |

|                                |   |                 |                     |                                   |
|--------------------------------|---|-----------------|---------------------|-----------------------------------|
| tr A0A0B8NIF8 A0A0B8NIF8_9NOCA | 1 | Actinobacteria  | Actinobacteria      | Nocardia seriolae                 |
| tr H0RG51 H0RG51_9ACTO         | 1 | Actinobacteria  | Actinobacteria      | Gordonia polyisoprenivorans       |
| tr J9S4Z5 J9S4Z5_9ACTO         | 1 | Actinobacteria  | Actinobacteria      | Gordonia sp. KTR9                 |
| tr L7LB07 L7LB07_9ACTO         | 1 | Actinobacteria  | Actinobacteria      | Gordonia hirsuta                  |
| tr M2X8Q5 M2X8Q5_9NOCA         | 1 | Actinobacteria  | Actinobacteria      | Rhodococcus triatomae             |
| tr H0ITI2 H0ITI2_MYCAB         | 1 | Actinobacteria  | Actinobacteria      | Mycobacterium abscessus           |
| tr L7KY97 L7KY97_9ACTO         | 1 | Actinobacteria  | Actinobacteria      | Gordonia amicalis                 |
| tr G7GY03 G7GY03_9ACTO         | 1 | Actinobacteria  | Actinobacteria      | Gordonia araii                    |
| tr A0A081GLL1 A0A081GLL1_9CHRO | 1 | Cyanobacteria   |                     | Cyanobium sp. CACIAM 14           |
| tr A3YTJ8 A3YTJ8_9SYNE         | 1 | Cyanobacteria   |                     | Synechococcus sp. WH 5701         |
| tr A3ZAH4 A3ZAH4_9SYNE         | 1 | Cyanobacteria   |                     | Synechococcus sp. RS9917          |
| tr G4FID8 G4FID8_9SYNE         | 1 | Cyanobacteria   |                     | Synechococcus sp. WH 8016         |
| tr G0A3P5 G0A3P5_METMM         | 1 | Proteobacteria  | Gammaproteobacteria | Methylomonas methanica            |
| tr W4LUG8 W4LUG8_9DELT         | 1 | Proteobacteria  | Deltaproteobacteria | Candidatus Entotheonella sp. TSY1 |
| tr A5G4U4 A5G4U4_GEOUR         | 1 | Proteobacteria  | Deltaproteobacteria | Geobacter uraniireducens          |
| tr A0LKZ5 A0LKZ5_SYNFM         | 1 | Proteobacteria  | Deltaproteobacteria | Syntrophobacter fumaroxidans      |
| tr S7TVJ4 S7TVJ4_9DELT         | 1 | Proteobacteria  | Deltaproteobacteria | Desulfovibrio sp. X2              |
| tr D8F365 D8F365_9DELT         | 1 | Proteobacteria  | Deltaproteobacteria | delta proteobacterium NaphS2      |
| tr S7TW54 S7TW54_DESML         | 1 | Proteobacteria  | Deltaproteobacteria | Desulfococcus multivorans         |
| tr A0A0C2HS84 A0A0C2HS84_9DELT | 1 | Proteobacteria  | Deltaproteobacteria | Geoalkalibacter ferrihydriticus   |
| tr F2NFS5 F2NFS5_DESAR         | 1 | Proteobacteria  | Deltaproteobacteria | Desulfobacca acetoxidans          |
| tr A0A0B5FKW7 A0A0B5FKW7_9DELT | 1 | Proteobacteria  | Deltaproteobacteria | Geoalkalibacter subterraneus      |
| tr Q30ZW6 Q30ZW6_DESAG         | 1 | Proteobacteria  | Deltaproteobacteria | Desulfovibrio alaskensis          |
| tr B8DN57 B8DN57_DESVM         | 1 | Proteobacteria  | Deltaproteobacteria | Desulfovibrio vulgaris            |
| tr B2A0D5 B2A0D5_OPITP         | 1 | Verrucomicrobia | Opitutae            | Opitutus terrae                   |
| tr F8UHI5 F8UHI5_9ZZZZ         | 1 |                 |                     | uncultured microorganism          |
| tr H8Z4Y8 H8Z4Y8_9GAMM         | 1 | Proteobacteria  | Gammaproteobacteria | Thiorhodovibrio sp. 970           |

|                                |    |                 |                     |                                       |
|--------------------------------|----|-----------------|---------------------|---------------------------------------|
| tr W4MEV2 W4MEV2_9DELT         | 1  | Proteobacteria  | Deltaproteobacteria | Candidatus Entotheonella sp. TSY2     |
| tr L0GYF9 L0GYF9_9GAMM         | 1  | Proteobacteria  | Gammaproteobacteria | Thioflaviccoccus mobilis              |
| tr B9XGL6 B9XGL6_PEDPL         | 1  | Verrucomicrobia | Verrucomicrobiae    | Pedosphaera parvula                   |
| tr A0A0A2HXH7 A0A0A2HXH7_9DELT | 1  | Proteobacteria  | Deltaproteobacteria | Desulfobulbus sp. Tol-SR              |
| tr B8KF18 B8KF18_9GAMM         | 1  | Proteobacteria  | Gammaproteobacteria | gamma proteobacterium NOR5-3          |
| tr B7RTG8 B7RTG8_9GAMM         | 1  | Proteobacteria  | Gammaproteobacteria | marine gamma proteobacterium HTCC2148 |
| tr E8RGR1 E8RGR1_DESPD         | 1  | Proteobacteria  | Deltaproteobacteria | Desulfobulbus propionicus             |
| tr G2FD41 G2FD41_9GAMM         | 1  | Proteobacteria  | Gammaproteobacteria | endosymbiont of Tevnia jerichonana    |
| tr H5WMD1 H5WMD1_9BURK         | 1  | Proteobacteria  | Betaproteobacteria  | Burkholderiales bacterium JOSHI_001   |
| tr I3IC48 I3IC48_9GAMM         | 1  | Proteobacteria  | Gammaproteobacteria | Cellvibrio sp. BR                     |
| tr V4JMR4 V4JMR4_9GAMM         | 1  | Proteobacteria  | Gammaproteobacteria | uncultured Thiohalocapsa sp. PB-PSB1  |
| tr K4KYM2 K4KYM2_SIMAS         | 1  | Proteobacteria  | Gammaproteobacteria | Simiduia agarivorans                  |
| tr B2JLL5 B2JLL5_BURP8         | 1  | Proteobacteria  | Betaproteobacteria  | Burkholderia phymatum                 |
| tr W0E052 W0E052_MARPU         | 1  | Proteobacteria  | Gammaproteobacteria | Marichromatium purpuratum             |
| tr I4MRH9 I4MRH9_9BURK         | 1  | Proteobacteria  | Betaproteobacteria  | Hydrogenophaga sp. PBC                |
| tr A0A081KAD9 A0A081KAD9_9GAMM | 1  | Proteobacteria  | Gammaproteobacteria | Endozoicomonas elysicola              |
| tr R7L8K7 R7L8K7_9BACT         | 1  | Verrucomicrobia | Opitutae            | Coralimargarita sp. CAG:312           |
| tr B8KVH9 B8KVH9_9GAMM         | 1  | Proteobacteria  | Gammaproteobacteria | Luminiphilus sylvensis                |
| tr W9GXU5 W9GXU5_9PROT         | 1  | Proteobacteria  | Alphaproteobacteria | Skermanella stibioresistens           |
| tr A0A095VVA6 A0A095VVA6_9GAMM | 1  | Proteobacteria  | Gammaproteobacteria | Pseudohalaea rubra                    |
| tr E1JSQ7 E1JSQ7_DESFR         | 1  | Proteobacteria  | Deltaproteobacteria | Desulfovibrio fructosivorans          |
| tr B8IZN6 B8IZN6_DESDA         | 1  | Proteobacteria  | Deltaproteobacteria | Desulfovibrio desulfuricans           |
| tr U2EPK4 U2EPK4_9GAMM         | 34 | Proteobacteria  | Gammaproteobacteria | Salinisphaera shabanensis             |
| tr A0A081N7I0 A0A081N7I0_9GAMM | 1  | Proteobacteria  | Gammaproteobacteria | Endozoicomonas montiporae             |
| tr H6SL22 H6SL22_RHOPH         | 1  | Proteobacteria  | Alphaproteobacteria | Rhodospirillum photometricum          |
| tr B1XY79 B1XY79_LEPCP         | 1  | Proteobacteria  | Betaproteobacteria  | Leptothrix cholodnii                  |
| tr Q0BS50 Q0BS50_GRABC         | 1  | Proteobacteria  | Alphaproteobacteria | Granulibacter bethesdensis            |

|                                |   |                 |                     |                                   |
|--------------------------------|---|-----------------|---------------------|-----------------------------------|
| tr F3S4X7 F3S4X7_9PROT         | 1 | Proteobacteria  | Alphaproteobacteria | Gluconacetobacter sp. SXCC-1      |
| tr Q1MPH8 Q1MPH8_LAWIP         | 1 | Proteobacteria  | Deltaproteobacteria | Lawsonia intracellularis          |
| tr M1PHI9 M1PHI9_DESSD         | 1 | Proteobacteria  | Deltaproteobacteria | Desulfocapsa sulfexigens          |
| tr D5EIN1 D5EIN1_CORAD         | 1 | Verrucomicrobia | Opitutae            | Coralimargarita akajimensis       |
| tr Q2IEA1 Q2IEA1_ANADE         | 1 | Proteobacteria  | Deltaproteobacteria | Anaeromyxobacter dehalogenans     |
| tr S9S5Z1 S9S5Z1_PHAFV         | 1 | Proteobacteria  | Alphaproteobacteria | Phaeospirillum fulvum             |
| tr R5RCH3 R5RCH3_9PROT         | 1 | Proteobacteria  |                     | Proteobacteria bacterium CAG:495  |
| tr A0A098GGM2 A0A098GGM2_TATMI | 1 | Proteobacteria  | Gammaproteobacteria | Tatlockia micdadei                |
| tr K2IJ94 K2IJ94_9PROT         | 1 | Proteobacteria  | Alphaproteobacteria | Oceanibaculum indicum             |
| tr B5ZDK2 B5ZDK2_GLUDA         | 1 | Proteobacteria  | Alphaproteobacteria | Gluconacetobacter diazotrophicus  |
| tr Q5ZZ42 Q5ZZ42_LEGPH         | 1 | Proteobacteria  | Gammaproteobacteria | Legionella pneumophila            |
| tr I2DY03 I2DY03_9BURK         | 6 | Proteobacteria  | Betaproteobacteria  | Burkholderia sp. KJ006            |
| tr R5XVI9 R5XVI9_9PROT         | 1 | Proteobacteria  | Alphaproteobacteria | Acetobacter sp. CAG:267           |
| tr A6DTV1 A6DTV1_9BACT         | 1 | Lentisphaerae   | Lentisphaeria       | Lentisphaera araneosa             |
| tr J6I926 J6I926_9FIRM         | 1 | Firmicutes      | Negativicutes       | Selenomonas sp. CM52              |
| tr C9KMC3 C9KMC3_9FIRM         | 1 | Firmicutes      | Negativicutes       | Mitsuokella multacida             |
| tr A0A0B2JWN9 A0A0B2JWN9_9FIRM | 1 | Firmicutes      | Negativicutes       | Anaerovibrio lipolyticus          |
| tr R6IC34 R6IC34_9FIRM         | 1 | Firmicutes      | Negativicutes       | Phascolarctobacterium sp. CAG:266 |
| tr G4Q3J3 G4Q3J3_ACIIR         | 1 | Firmicutes      | Negativicutes       | Acidaminococcus intestini         |
| tr M1E695 M1E695_9FIRM         | 1 | Firmicutes      | Clostridia          | Thermodesulfobium narugense       |
| tr A0A096AJ86 A0A096AJ86_9FIRM | 1 | Firmicutes      | Negativicutes       | Veillonella montpellierensis      |
| tr R7CT29 R7CT29_9FIRM         | 1 | Firmicutes      | Negativicutes       | Dialister sp. CAG:357             |
| tr H5SN55 H5SN55_9ZZZZ         | 1 |                 |                     | uncultured prokaryote             |
| tr B2KBY4 B2KBY4_ELUMP         | 1 | Elusimicrobia   | Elusimicrobia       | Elusimicrobium minutum            |
| tr D9PKF2 D9PKF2_9ZZZZ         | 1 |                 |                     | sediment metagenome               |
| tr D3L2J2 D3L2J2_9BACT         | 1 | Synergistetes   | Synergistia         | Anaerobaculum hydrogeniformans    |
| tr S0EU26 S0EU26_CHTCT         | 1 | Armatimonadetes | Chthonomonadetes    | Chthonomonas calidirosea          |



|                                |   |                |                  |                             |
|--------------------------------|---|----------------|------------------|-----------------------------|
| tr K5BC95 K5BC95_9MYCO         | 1 | Actinobacteria | Actinobacteria   | Mycobacterium hassiacum     |
| tr D1A3I9 D1A3I9_THECD         | 2 | Actinobacteria | Actinobacteria   | Thermomonospora curvata     |
| tr D1AD50 D1AD50_THECD         | 2 | Actinobacteria | Actinobacteria   | Thermomonospora curvata     |
| tr D5UP33 D5UP33_TSUPD         | 1 | Actinobacteria | Actinobacteria   | Tsukamurella paurometabola  |
| tr E2SGB2 E2SGB2_9ACTO         | 1 | Actinobacteria | Actinobacteria   | Aeromicrobium marinum       |
| tr W8DX92 W8DX92_9FLOR         | 1 | Rhodophyta     | Florideophyceae  | Gracilaria salicornia       |
| tr M5DDI3 M5DDI3_CHOCHR        | 1 | Rhodophyta     | Florideophyceae  | Chondrus crispus            |
| tr M4ITX4 M4ITX4_CALTB         | 1 | Rhodophyta     | Florideophyceae  | Calliarthron tuberculosum   |
| tr M4QH14 M4QH14_PYRYE         | 1 | Rhodophyta     | Bangiophyceae    | Pyropia yezoensis           |
| tr A0A0B5W5W5 A0A0B5W5W5_9FLOR | 1 | Rhodophyta     | Florideophyceae  | Vertebrata lanosa           |
| tr M1WZE5 M1WZE5_9NOST         | 1 | Cyanobacteria  |                  | Richelia intracellularis    |
| tr K9TI08 K9TI08_9CYAN         | 1 | Cyanobacteria  |                  | Oscillatoria acuminata      |
| tr E0UEU6 E0UEU6_CYAP2         | 1 | Cyanobacteria  |                  | Cyanothece sp. PCC 7822     |
| tr K9SAM0 K9SAM0_9CYAN         | 1 | Cyanobacteria  |                  | Geitlerinema sp. PCC 7407   |
| tr I4GHH3 I4GHH3_MICAE         | 1 | Cyanobacteria  |                  | Microcystis aeruginosa      |
| tr A0A0C2KX23 A0A0C2KX23_9CYAN | 1 | Cyanobacteria  |                  | Tolypothrix campylonemoides |
| tr B7KAF9 B7KAF9_CYAP7         | 1 | Cyanobacteria  |                  | Cyanothece sp. PCC 7424     |
| tr Q85G49 Q85G49_CYAME         | 1 | Rhodophyta     | Bangiophyceae    | Cyanidioschyzon merolae     |
| tr E1ZQ59 E1ZQ59_CHLVA         | 1 | Chlorophyta    | Trebouxiophyceae | Chlorella variabilis        |
| tr K9ZMD4 K9ZMD4_ANACC         | 1 | Cyanobacteria  |                  | Anabaena cylindrica         |
| tr A0A0C1WCB9 A0A0C1WCB9_9CYAN | 1 | Cyanobacteria  |                  | Scytonema millei            |
| tr F5UHF2 F5UHF2_9CYAN         | 1 | Cyanobacteria  |                  | Microcoleus vaginatus       |
| tr D8RA32 D8RA32_SELML         | 1 | Streptophyta   |                  | Selaginella moellendorffii  |
| tr K9UM08 K9UM08_9CHRO         | 1 | Cyanobacteria  |                  | Chamaesiphon minutus        |
| tr Q113C6 Q113C6_TRIEI         | 1 | Cyanobacteria  |                  | Trichodesmium erythraeum    |
| tr L8LYK1 L8LYK1_9CYAN         | 1 | Cyanobacteria  |                  | Xenococcus sp. PCC 7305     |
| tr K9PWE9 K9PWE9_9CYAN         | 1 | Cyanobacteria  |                  | Leptolyngbya sp. PCC 7376   |

|                                |   |                |                     |                                   |
|--------------------------------|---|----------------|---------------------|-----------------------------------|
| tr A0A098G1D3 A0A098G1D3_9GAMM | 1 | Proteobacteria | Gammaproteobacteria | Legionella fallonii               |
| tr D3HS59 D3HS59_LEGLN         | 1 | Proteobacteria | Gammaproteobacteria | Legionella longbeachae            |
| tr E5XTR2 E5XTR2_9ACTO         | 1 | Actinobacteria | Actinobacteria      | Segniliparus rugosus              |
| tr C9LPP2 C9LPP2_9FIRM         | 1 | Firmicutes     | Negativicutes       | Dialister invisus                 |
| tr A0A0C1XFX3 A0A0C1XFX3_9CYAN | 1 | Cyanobacteria  |                     | Hassallia byssoidea               |
| tr H1D371 H1D371_9FIRM         | 1 | Firmicutes     | Negativicutes       | Dialister succinatiphilus         |
| tr A8ZRS4 A8ZRS4_DESOH         | 1 | Proteobacteria | Deltaproteobacteria | Desulfococcus oleovorans          |
| tr A0A077K340 A0A077K340_LIBAS | 1 | Proteobacteria | Alphaproteobacteria | Candidatus Liberibacter asiaticus |
| tr D2B9W2 D2B9W2_STRRD         | 2 | Actinobacteria | Actinobacteria      | Streptosporangium roseum          |
| tr C3XC81 C3XC81_OXAFO         | 1 | Proteobacteria | Betaproteobacteria  | Oxalobacter formigenes            |
| tr D8EW13 D8EW13_9DELT         | 1 | Proteobacteria | Deltaproteobacteria | delta proteobacterium NaphS2      |
| tr N6ZUM6 N6ZUM6_9RHOO         | 1 | Proteobacteria | Betaproteobacteria  | Thauera phenylacetica             |
| tr H0TS64 H0TS64_9BRAD         | 1 | Proteobacteria | Alphaproteobacteria | Bradyrhizobium sp. STM 3843       |
| tr A0A0B0ENV4 A0A0B0ENV4_9BACT | 1 | Planctomycetes | Planctomycetia      | Candidatus Scalindua brodae       |
| tr C7LVW2 C7LVW2_DESBD         | 1 | Proteobacteria | Deltaproteobacteria | Desulfomicrobium baculatum        |
| tr K9HJ50 K9HJ50_9PROT         | 1 | Proteobacteria | Alphaproteobacteria | Caenispirillum salinarum          |
| tr A6GAD6 A6GAD6_9DELT         | 1 | Proteobacteria | Deltaproteobacteria | Plesiocystis pacifica             |
| tr B3QVW9 B3QVW9_CHLT3         | 1 | Chlorobi       | Chlorobia           | Chloroherpeton thalassium         |
| tr F8F160 F8F160_TRECH         | 1 | Spirochaetes   | Spirochaetia        | Treponema caldaria                |
| tr F5Y8F4 F5Y8F4_TREAZ         | 1 | Spirochaetes   | Spirochaetia        | Treponema azotonutricium          |
| tr E0RRH8 E0RRH8_SPITD         | 1 | Spirochaetes   | Spirochaetia        | Spirochaeta thermophila           |
| tr E1R695 E1R695_SPISS         | 1 | Spirochaetes   | Spirochaetia        | Spirochaeta smaragdinae           |
| tr U1LTX9 U1LTX9_9GAMM         | 1 | Proteobacteria | Gammaproteobacteria | Pseudoalteromonas rubra           |
| tr F5YJA1 F5YJA1_TREPZ         | 1 | Spirochaetes   | Spirochaetia        | Treponema primitia                |
| tr S6D5Y1 S6D5Y1_ACEPA         | 1 | Proteobacteria | Alphaproteobacteria | Acetobacter pasteurianus          |
| tr A0A060QGU1 A0A060QGU1_9PROT | 1 | Proteobacteria | Alphaproteobacteria | Asaia platycodi                   |
| tr Q0BS79 Q0BS79_GRABC         | 1 | Proteobacteria | Alphaproteobacteria | Granulibacter thesedensis         |

|                                |   |                |                     |                                              |
|--------------------------------|---|----------------|---------------------|----------------------------------------------|
| tr W7DWD6 W7DWD6_9PROT         | 1 | Proteobacteria | Alphaproteobacteria | Commensalibacter sp. MX01                    |
| tr A0A060Q9W3 A0A060Q9W3_9PROT | 1 | Proteobacteria | Alphaproteobacteria | Saccharibacter sp. AM169                     |
| tr A0A011NGR7 A0A011NGR7_9PROT | 1 | Proteobacteria | Betaproteobacteria  | Candidatus Accumulibacter sp. BA-92          |
| tr F3GK63 F3GK63_PSESJ         | 1 | Proteobacteria | Gammaproteobacteria | Pseudomonas syringae                         |
| tr D2PUA2 D2PUA2_KRIFD         | 1 | Actinobacteria | Actinobacteria      | Kribbella flavida                            |
| tr V8TLZ7 V8TLZ7_9CHLA         | 1 | Chlamydiae     | Chlamydiia          | Chlamydia pecorum                            |
| tr Q5L5P3 Q5L5P3_CHLAB         | 1 | Chlamydiae     | Chlamydiia          | Chlamydophila abortus                        |
| tr F8L848 F8L848_SIMNZ         | 1 | Chlamydiae     | Chlamydiia          | Simkania negevensis                          |
| tr K2ED49 K2ED49_9BACT         | 1 |                |                     | uncultured bacterium                         |
| tr A0A0C1HIS7 A0A0C1HIS7_9CHLA | 1 | Chlamydiae     | Chlamydiia          | Neochlamydia sp. EPS4                        |
| tr A0A0C2YU48 A0A0C2YU48_MAGMG | 1 | Proteobacteria | Alphaproteobacteria | Magnetospirillum magnetotacticum             |
| tr Q2RQ88 Q2RQ88_RHORT         | 1 | Proteobacteria | Alphaproteobacteria | Rhodospirillum rubrum                        |
| tr C5JAQ5 C5JAQ5_9BACT         | 1 |                |                     | uncultured bacterium                         |
| tr W6KBR3 W6KBR3_9PROT         | 1 | Proteobacteria | Alphaproteobacteria | Magnetospira sp. QH-2                        |
| tr A0A0B0HB63 A0A0B0HB63_SOVGS | 1 | Proteobacteria | Gammaproteobacteria | Solemya velum gill symbiont                  |
| tr D5BR40 D5BR40_PUNMI         | 1 | Proteobacteria | Alphaproteobacteria | Candidatus Puniceispirillum marinum          |
| tr G5ZYC3 G5ZYC3_9PROT         | 1 | Proteobacteria | Alphaproteobacteria | SAR116 cluster alpha proteobacterium HIMB100 |
| tr F9UI97 F9UI97_9GAMM         | 1 | Proteobacteria | Gammaproteobacteria | Thiocapsa marina                             |
| tr L0R8C9 L0R8C9_9DELT         | 1 | Proteobacteria | Deltaproteobacteria | Desulfovibrio hydrothermalis                 |
| tr W5YCB9 W5YCB9_KOMXY         | 1 | Proteobacteria | Alphaproteobacteria | Komagataeibacter xylinus                     |
| tr A0A0B8NN74 A0A0B8NN74_9NOCA | 1 | Actinobacteria | Actinobacteria      | Nocardia seriolae                            |
| tr L8DGA8 L8DGA8_9NOCA         | 1 | Actinobacteria | Actinobacteria      | Rhodococcus sp. AW25M09                      |
| tr G7GXB0 G7GXB0_9ACTO         | 1 | Actinobacteria | Actinobacteria      | Gordonia araii                               |
| tr A0A089UGL1 A0A089UGL1_MYCAB | 1 | Actinobacteria | Actinobacteria      | Mycobacterium abscessus                      |
| tr G8RXX0 G8RXX0_MYCRN         | 1 | Actinobacteria | Actinobacteria      | Mycobacterium rhodesiae                      |
| tr D6Z975 D6Z975_SEGRD         | 1 | Actinobacteria | Actinobacteria      | Segniliparus rotundus                        |
| tr L7LDL3 L7LDL3_9ACTO         | 1 | Actinobacteria | Actinobacteria      | Gordonia hirsuta                             |

|                                |   |                |                |                                             |
|--------------------------------|---|----------------|----------------|---------------------------------------------|
| tr H6MY46 H6MY46_GORPV         | 1 | Actinobacteria | Actinobacteria | Gordonia polyisoprenivorans                 |
| tr H0QWP4 H0QWP4_9ACTO         | 1 | Actinobacteria | Actinobacteria | Gordonia effusa                             |
| tr H5UKZ0 H5UKZ0_9ACTO         | 1 | Actinobacteria | Actinobacteria | Gordonia terrae                             |
| tr D5UW68 D5UW68_TSUPD         | 1 | Actinobacteria | Actinobacteria | Tsukamurella paurometabola                  |
| tr B3QS87 B3QS87_CHLT3         | 1 | Chlorobi       | Chlorobia      | Chloroherpeton thalassium                   |
| tr Q029L2 Q029L2_SOLUE         | 1 | Acidobacteria  | Solibacteres   | Candidatus Solibacter usitatus              |
| tr G2LE23 G2LE23_CHLTF         | 1 | Acidobacteria  |                | Candidatus Chloracidobacterium thermophilum |
| tr L8D9B1 L8D9B1_9NOCA         | 1 | Actinobacteria | Actinobacteria | Rhodococcus sp. AW25M09                     |
| tr M3VHL4 M3VHL4_9ACTO         | 1 | Actinobacteria | Actinobacteria | Gordonia paraffinivorans                    |
| tr H0R661 H0R661_9ACTO         | 1 | Actinobacteria | Actinobacteria | Gordonia effusa                             |
| tr B1MHM4 B1MHM4_MYCA9         | 1 | Actinobacteria | Actinobacteria | Mycobacterium abscessus                     |
| tr A0A022LUR2 A0A022LUR2_9ACTO | 1 | Actinobacteria | Actinobacteria | Dietzia sp. UCD-THP                         |
| tr L7L6L0 L7L6L0_9ACTO         | 1 | Actinobacteria | Actinobacteria | Gordonia hirsuta                            |
| tr A0A0A1DIU8 A0A0A1DIU8_NOCSI | 1 | Actinobacteria | Actinobacteria | Pimelobacter simplex                        |
| tr E9UWP5 E9UWP5_9ACTO         | 1 | Actinobacteria | Actinobacteria | Nocardioideaceae bacterium Broad-1          |
| tr H5X8F9 H5X8F9_9PSEU         | 1 | Actinobacteria | Actinobacteria | Saccharomonospora marina                    |
| tr I0P733 I0P733_MYCAB         | 1 | Actinobacteria | Actinobacteria | Mycobacterium abscessus                     |
| tr E2S872 E2S872_9ACTO         | 1 | Actinobacteria | Actinobacteria | Aeromicrobium marinum                       |
| tr H0RDR8 H0RDR8_9ACTO         | 1 | Actinobacteria | Actinobacteria | Gordonia polyisoprenivorans                 |
| tr H0R4X6 H0R4X6_9ACTO         | 1 | Actinobacteria | Actinobacteria | Gordonia effusa                             |
| tr A0A0B8NCM8 A0A0B8NCM8_9NOCA | 1 | Actinobacteria | Actinobacteria | Nocardia seriola                            |
| tr L7K4P6 L7K4P6_GORRU         | 1 | Actinobacteria | Actinobacteria | Gordonia rubripertincta                     |
| tr D5UYR7 D5UYR7_TSUPD         | 1 | Actinobacteria | Actinobacteria | Tsukamurella paurometabola                  |
| tr H6R8W4 H6R8W4_NOCCG         | 1 | Actinobacteria | Actinobacteria | Nocardia cyriacigeorgica                    |
| tr D5UW67 D5UW67_TSUPD         | 1 | Actinobacteria | Actinobacteria | Tsukamurella paurometabola                  |
| tr U5ELN3 U5ELN3_NOCAS         | 1 | Actinobacteria | Actinobacteria | Nocardia asteroides                         |
| tr L7LEC1 L7LEC1_9ACTO         | 1 | Actinobacteria | Actinobacteria | Gordonia hirsuta                            |

|                                |    |                |                     |                                |
|--------------------------------|----|----------------|---------------------|--------------------------------|
| tr L7LDJ2 L7LDJ2_9ACTO         | 1  | Actinobacteria | Actinobacteria      | Gordonia hirsuta               |
| tr D6Z974 D6Z974_SEGRD         | 1  | Actinobacteria | Actinobacteria      | Segniliparus rotundus          |
| tr V7KTT9 V7KTT9_MYCPC         | 1  | Actinobacteria | Actinobacteria      | Mycobacterium avium            |
| tr F6EN08 F6EN08_AMYSD         | 1  | Actinobacteria | Actinobacteria      | Amycolicococcus subflavus      |
| tr L7KXK9 L7KXK9_9ACTO         | 1  | Actinobacteria | Actinobacteria      | Gordonia amicalis              |
| tr C6WN65 C6WN65_ACTMD         | 6  | Actinobacteria | Actinobacteria      | Actinosynnema mirum            |
| tr W8HEA5 W8HEA5_RHOOP         | 2  | Actinobacteria | Actinobacteria      | Rhodococcus opacus             |
| tr H0R406 H0R406_9ACTO         | 1  | Actinobacteria | Actinobacteria      | Gordonia effusa                |
| tr A0A08111V3 A0A08111V3_9MYCO | 1  | Actinobacteria | Actinobacteria      | Mycobacterium sp. TKK-01-0059  |
| tr D5P5W1 D5P5W1_9MYCO         | 1  | Actinobacteria | Actinobacteria      | Mycobacterium parascrofulaceum |
| tr G7H7F9 G7H7F9_9ACTO         | 1  | Actinobacteria | Actinobacteria      | Gordonia araii                 |
| tr A0A0B8NIF5 A0A0B8NIF5_9NOCA | 1  | Actinobacteria | Actinobacteria      | Nocardia seriolae              |
| tr J9S094 J9S094_9ACTO         | 1  | Actinobacteria | Actinobacteria      | Gordonia sp. KTR9              |
| tr K0VAU2 K0VAU2_MYCFO         | 1  | Actinobacteria | Actinobacteria      | Mycobacterium fortuitum        |
| tr F6EHS3 F6EHS3_AMYSD         | 1  | Actinobacteria | Actinobacteria      | Amycolicococcus subflavus      |
| tr H0ITI6 H0ITI6_MYCAB         | 1  | Actinobacteria | Actinobacteria      | Mycobacterium abscessus        |
| tr H0QWG1 H0QWG1_9ACTO         | 1  | Actinobacteria | Actinobacteria      | Gordonia effusa                |
| tr H5U1P1 H5U1P1_9ACTO         | 1  | Actinobacteria | Actinobacteria      | Gordonia sputi                 |
| tr H5UG91 H5UG91_9ACTO         | 1  | Actinobacteria | Actinobacteria      | Gordonia terrae                |
| tr H0RMK6 H0RMK6_9ACTO         | 1  | Actinobacteria | Actinobacteria      | Gordonia polyisoprenivorans    |
| tr B3SFA0 B3SFA0_TRIAD         | 37 | Placozoa       |                     | Trichoplax adhaerens           |
| tr L7L1E9 L7L1E9_9ACTO         | 1  | Actinobacteria | Actinobacteria      | Gordonia amicalis              |
| tr R6PMH5 R6PMH5_9CLOT         | 1  | Firmicutes     | Clostridia          | Clostridium sp. CAG:306        |
| tr R5K923 R5K923_9CLOT         | 1  | Firmicutes     | Clostridia          | Clostridium sp. CAG:967        |
| tr R5SYZ8 R5SYZ8_9GAMM         | 1  | Proteobacteria | Gammaproteobacteria | Acinetobacter sp. CAG:196      |
| tr R7MF15 R7MF15_9CLOT         | 1  | Firmicutes     | Clostridia          | Clostridium sp. CAG:813        |
| tr K2EV59 K2EV59_9BACT         | 1  |                |                     | uncultured bacterium           |

|                                |    |                 |                     |                               |
|--------------------------------|----|-----------------|---------------------|-------------------------------|
| tr R5H5L0 R5H5L0_9SPIR         | 1  | Spirochaetes    | Spirochaetia        | Brachyspira sp. CAG:484       |
| tr F7US12 F7US12_SYNYG         | 1  | Cyanobacteria   |                     | Synechocystis sp. PCC 6803    |
| tr L8LQP9 L8LQP9_9CHRO         | 1  | Cyanobacteria   |                     | Gloeocapsa sp. PCC 73106      |
| tr D8FZ94 D8FZ94_9CYAN         | 1  | Cyanobacteria   |                     | [Oscillatoria] sp. PCC 6506   |
| tr I4INL4 I4INL4_MICAE         | 1  | Cyanobacteria   |                     | Microcystis aeruginosa        |
| tr A0A073CN05 A0A073CN05_PLAAG | 1  | Cyanobacteria   |                     | Planktothrix agardhii         |
| tr A0A068MXK0 A0A068MXK0_SYNY4 | 1  | Cyanobacteria   |                     | Synechocystis sp. PCC 6714    |
| tr K9YNG8 K9YNG8_CYASC         | 1  | Cyanobacteria   |                     | Cyanobacterium stanieri       |
| tr K9Z8P8 K9Z8P8_CYAAP         | 1  | Cyanobacteria   |                     | Cyanobacterium aponinum       |
| tr V5V315 V5V315_9CHRO         | 1  | Cyanobacteria   |                     | Thermosynechococcus sp. NK55a |
| tr U5QHE0 U5QHE0_9CYAN         | 1  | Cyanobacteria   | Gloeobacteria       | Gloeobacter kilaueensis       |
| tr A0A061RFD7 A0A061RFD7_9CHLO | 1  | Chlorophyta     | Chlorodendrophyceae | Tetraselmis sp. GSL018        |
| tr M4F3Z1 M4F3Z1_BRARP         | 23 | Streptophyta    |                     | Brassica rapa                 |
| tr K8F4W2 K8F4W2_9CHLO         | 1  | Chlorophyta     | Mamiellophyceae     | Bathycoccus prasinos          |
| tr R7WDS0 R7WDS0_AEGTA         | 1  | Streptophyta    | Liliopsida          | Aegilops tauschii             |
| tr I2PX81 I2PX81_9DELT         | 1  | Proteobacteria  | Deltaproteobacteria | Desulfovibrio sp. U5L         |
| tr U7D4Y0 U7D4Y0_9BACT         | 1  | Fibrobacteres   | Chitinivibrionia    | Chitinivibrio alkaliphilus    |
| tr I7A3J2 I7A3J2_MELRP         | 1  | Ignavibacteriae | Ignavibacteria      | Melioribacter roseus          |
| tr B3QRY4 B3QRY4_CHLT3         | 1  | Chlorobi        | Chlorobia           | Chloroherpeton thalassium     |
| tr G7VAB7 G7VAB7_THELD         | 1  | Synergistetes   | Synergistia         | Thermovirga lienii            |
| tr B1ZUD3 B1ZUD3_OPITP         | 1  | Verrucomicrobia | Opitutae            | Opitutus terrae               |
| tr A0A061R3K3 A0A061R3K3_9CHLO | 1  | Chlorophyta     | Chlorodendrophyceae | Tetraselmis sp. GSL018        |
| tr A0A0B2S1Y9 A0A0B2S1Y9_GLYSO | 1  | Streptophyta    |                     | Glycine soja                  |
| tr M0VLR3 M0VLR3_HORVD         | 1  | Streptophyta    | Liliopsida          | Hordeum vulgare               |
| tr D8TMP4 D8TMP4_VOLCA         | 1  | Chlorophyta     | Chlorophyceae       | Volvox carteri                |
| tr I0AJV2 I0AJV2_IGNAJ         | 1  | Ignavibacteriae | Ignavibacteria      | Ignavibacterium album         |
| tr I4BAE9 I4BAE9_TURPD         | 1  | Spirochaetes    | Spirochaetia        | Turneriella parva             |

|                                 |   |                 |                     |                                    |
|---------------------------------|---|-----------------|---------------------|------------------------------------|
| tr A0A084SZ26 A0A084SZ26_9DELT  | 1 | Proteobacteria  | Deltaproteobacteria | Cystobacter violaceus              |
| tr C0BMZ4 C0BMZ4_9BACT          | 1 | Bacteroidetes   | Flavobacteriia      | Flavobacteria bacterium MS024-3C   |
| tr A0A060Q9R5 A0A060Q9R5_9PROT  | 1 | Proteobacteria  | Alphaproteobacteria | Saccharibacter sp. AM169           |
| tr E6Q2N8 E6Q2N8_9ZZZZ          | 1 |                 |                     | mine drainage metagenome           |
| tr X1IP95 X1IP95_9ZZZZ          | 1 |                 |                     | marine sediment metagenome         |
| tr B9XRW0 B9XRW0_PEDPL          | 1 | Verrucomicrobia | Verrucomicrobiae    | Pedosphaera parvula                |
| tr R7CU31 R7CU31_9FIRM          | 1 | Firmicutes      | Negativicutes       | Dialister sp. CAG:357              |
| tr W1S137 W1S137_9SPHN          | 1 | Proteobacteria  | Alphaproteobacteria | Sphingobium sp. C100               |
| tr A0A0A6CX02 A0A0A6CX02_9SPHN  | 1 | Proteobacteria  | Alphaproteobacteria | Sphingomonas sp. Ant20             |
| tr A5PDE9 A5PDE9_9SPHN          | 1 | Proteobacteria  | Alphaproteobacteria | Erythrobacter sp. SD-21            |
| tr H0E7N6 H0E7N6_9ACTN          | 1 | Actinobacteria  | Actinobacteria      | Patulibacter medicamentivorans     |
| tr A6CDE5 A6CDE5_9PLAN          | 1 | Planctomycetes  | Planctomycetia      | Planctomyces maris                 |
| tr X8F536 X8F536_MYCUL          | 1 | Actinobacteria  | Actinobacteria      | Mycobacterium ulcerans             |
| tr A0A024JUZ3 A0A024JUZ3_9MYCO  | 1 | Actinobacteria  | Actinobacteria      | Mycobacterium triplex              |
| tr E9USY5 E9USY5_9ACTO          | 1 | Actinobacteria  | Actinobacteria      | Nocardioideaceae bacterium Broad-1 |
| tr A0A076MKP2 A0A076MKP2_9AMYME | 1 | Actinobacteria  | Actinobacteria      | Amycolatopsis methanolica          |
| tr A0A0B5F9V1 A0A0B5F9V1_9ACTO  | 1 | Actinobacteria  | Actinobacteria      | Streptomyces albus                 |
| tr A0A076MT28 A0A076MT28_9AMYME | 1 | Actinobacteria  | Actinobacteria      | Amycolatopsis methanolica          |
| tr A0A0B5F6P9 A0A0B5F6P9_9ACTO  | 1 | Actinobacteria  | Actinobacteria      | Streptomyces albus                 |
| tr H0EAN1 H0EAN1_9ACTN          | 1 | Actinobacteria  | Actinobacteria      | Patulibacter medicamentivorans     |
| tr E9USY2 E9USY2_9ACTO          | 1 | Actinobacteria  | Actinobacteria      | Nocardioideaceae bacterium Broad-1 |
| tr H0E6M7 H0E6M7_9ACTN          | 1 | Actinobacteria  | Actinobacteria      | Patulibacter medicamentivorans     |
| tr H0E6M4 H0E6M4_9ACTN          | 1 | Actinobacteria  | Actinobacteria      | Patulibacter medicamentivorans     |
| tr A0A0B5EZK5 A0A0B5EZK5_9ACTO  | 1 | Actinobacteria  | Actinobacteria      | Streptomyces albus                 |
| tr H0E5N7 H0E5N7_9ACTN          | 1 | Actinobacteria  | Actinobacteria      | Patulibacter medicamentivorans     |
| tr A0A076N0G6 A0A076N0G6_9AMYME | 1 | Actinobacteria  | Actinobacteria      | Amycolatopsis methanolica          |
| tr D3F0X6 D3F0X6_CONWI          | 1 | Actinobacteria  | Actinobacteria      | Conexibacter woesei                |

|                                 |   |                |                     |                                       |
|---------------------------------|---|----------------|---------------------|---------------------------------------|
| tr H0E5K5 H0E5K5_9ACTN          | 1 | Actinobacteria | Actinobacteria      | Patulibacter medicamentivorans        |
| tr X8C6V2 X8C6V2_MYCXE          | 1 | Actinobacteria | Actinobacteria      | Mycobacterium xenopi                  |
| tr Q317Q4 Q317Q4_DESAG          | 1 | Proteobacteria | Deltaproteobacteria | Desulfovibrio alaskensis              |
| tr T2G999 T2G999_DESGI          | 1 | Proteobacteria | Deltaproteobacteria | Desulfovibrio gigas                   |
| tr A0A068JLL7 A0A068JLL7_9DELT  | 1 | Proteobacteria | Deltaproteobacteria | Desulfonatronum thiodismutans         |
| tr B8FKV6 B8FKV6_DESAA          | 1 | Proteobacteria | Deltaproteobacteria | Desulfatibacillum alkenivorans        |
| tr D5UYS1 D5UYS1_TSUPD          | 1 | Actinobacteria | Actinobacteria      | Tsukamurella paurometabola            |
| tr G2PRP0 G2PRP0_MURRD          | 1 | Bacteroidetes  | Flavobacteriia      | Muricauda ruestringensis              |
| tr H1Y660 H1Y660_9SPHI          | 1 | Bacteroidetes  | Sphingobacteriia    | Mucilaginibacter paludis              |
| tr G8TD13 G8TD13_NIAKG          | 1 | Bacteroidetes  | Sphingobacteriia    | Niastella koreensis                   |
| tr A0A0A2N3S4 A0A0A2N3S4_9FLAO  | 1 | Bacteroidetes  | Flavobacteriia      | Flavobacterium subsaxonicum           |
| tr K7Z2L4 K7Z2L4_BDEBC          | 1 | Proteobacteria | Deltaproteobacteria | Bdellovibrio bacteriovorus            |
| tr D0LTW5 D0LTW5_HALO1          | 1 | Proteobacteria | Deltaproteobacteria | Haliangium ochraceum                  |
| tr R6APB1 R6APB1_9FIRM          | 1 | Firmicutes     | Negativicutes       | Dialister sp. CAG:486                 |
| tr H0E7N7 H0E7N7_9ACTN          | 1 | Actinobacteria | Actinobacteria      | Patulibacter medicamentivorans        |
| tr H0EAN0 H0EAN0_9ACTN          | 1 | Actinobacteria | Actinobacteria      | Patulibacter medicamentivorans        |
| tr H0E6M6 H0E6M6_9ACTN          | 1 | Actinobacteria | Actinobacteria      | Patulibacter medicamentivorans        |
| tr A0A076MU17 A0A076MU17_9AMYME | 1 | Actinobacteria | Actinobacteria      | Amycolatopsis methanolica             |
| tr A0A076N0H2 A0A076N0H2_9AMYME | 1 | Actinobacteria | Actinobacteria      | Amycolatopsis methanolica             |
| tr H0E8D5 H0E8D5_9ACTN          | 1 | Actinobacteria | Actinobacteria      | Patulibacter medicamentivorans        |
| tr H0E5Y4 H0E5Y4_9ACTN          | 1 | Actinobacteria | Actinobacteria      | Patulibacter medicamentivorans        |
| tr H0EAY5 H0EAY5_9ACTN          | 1 | Actinobacteria | Actinobacteria      | Patulibacter medicamentivorans        |
| tr F8AY49 F8AY49_FRADG          | 1 | Actinobacteria | Actinobacteria      | Frankia symbiont of Datisca glomerata |
| tr A0A076MM50 A0A076MM50_9AMYME | 1 | Actinobacteria | Actinobacteria      | Amycolatopsis methanolica             |
| tr K5BP85 K5BP85_LEPME          | 1 | Spirochaetes   | Spirochaetia        | Leptospira meyeri                     |
| tr H2CAK7 H2CAK7_9LEPT          | 1 | Spirochaetes   | Spirochaetia        | Leptonema illini                      |
| tr N1WL36 N1WL36_9LEPT          | 1 | Spirochaetes   | Spirochaetia        | Leptospira weilii                     |



|                                |    |                 |                     |                                       |
|--------------------------------|----|-----------------|---------------------|---------------------------------------|
| tr R8ZSH3 R8ZSH3_9LEPT         | 1  | Spirochaetes    | Spirochaetia        | Leptospira yanagawae                  |
| tr F6EN12 F6EN12_AMYSD         | 1  | Actinobacteria  | Actinobacteria      | Amycolalicoccus subflavus             |
| tr F6EHS6 F6EHS6_AMYSD         | 2  | Actinobacteria  | Actinobacteria      | Amycolalicoccus subflavus             |
| tr D1A3I6 D1A3I6_THECD         | 1  | Actinobacteria  | Actinobacteria      | Thermomonospora curvata               |
| tr A3ZZF3 A3ZZF3_9PLAN         | 1  | Planctomycetes  | Planctomycetia      | Blastopirellula marina                |
| tr K2DZQ2 K2DZQ2_9BACT         | 1  |                 |                     | uncultured bacterium                  |
| tr D5UYR6 D5UYR6_TSUPD         | 1  | Actinobacteria  | Actinobacteria      | Tsukamurella paurometabola            |
| tr I9IY71 I9IY71_MYCAB         | 1  | Actinobacteria  | Actinobacteria      | Mycobacterium abscessus               |
| tr W5WX97 W5WX97_BDEBC         | 1  | Proteobacteria  | Deltaproteobacteria | Bdellovibrio bacteriovorus            |
| tr H0E5X9 H0E5X9_9ACTN         | 1  | Actinobacteria  | Actinobacteria      | Patulibacter medicamentivorans        |
| tr I3IRA7 I3IRA7_9PLAN         | 1  | Planctomycetes  | Planctomycetia      | planctomycete KSU-1                   |
| tr L0DA47 L0DA47_SINAD         | 18 | Planctomycetes  | Planctomycetia      | Singulisphaera acidiphila             |
| tr C0QWQ9 C0QWQ9_BRAHW         | 1  | Spirochaetes    | Spirochaetia        | Brachyspira hyodysenteriae            |
| tr F8AY53 F8AY53_FRADG         | 1  | Actinobacteria  | Actinobacteria      | Frankia symbiont of Datisca glomerata |
| tr H0E9N4 H0E9N4_9ACTN         | 1  | Actinobacteria  | Actinobacteria      | Patulibacter medicamentivorans        |
| tr H0E613 H0E613_9ACTN         | 1  | Actinobacteria  | Actinobacteria      | Patulibacter medicamentivorans        |
| tr H0E056 H0E056_9ACTN         | 6  | Actinobacteria  | Actinobacteria      | Patulibacter medicamentivorans        |
| tr F8AY52 F8AY52_FRADG         | 1  | Actinobacteria  | Actinobacteria      | Frankia symbiont of Datisca glomerata |
| tr H0E5Y2 H0E5Y2_9ACTN         | 1  | Actinobacteria  | Actinobacteria      | Patulibacter medicamentivorans        |
| tr H0E4W7 H0E4W7_9ACTN         | 1  | Actinobacteria  | Actinobacteria      | Patulibacter medicamentivorans        |
| tr H5X813 H5X813_9PSEU         | 1  | Actinobacteria  | Actinobacteria      | Saccharomonospora marina              |
| tr J9Z1B9 J9Z1B9_9PROT         | 1  | Proteobacteria  | Alphaproteobacteria | alpha proteobacterium HIMB59          |
| tr H0E7H8 H0E7H8_9ACTN         | 1  | Actinobacteria  | Actinobacteria      | Patulibacter medicamentivorans        |
| tr D3F0X7 D3F0X7_CONWI         | 1  | Actinobacteria  | Actinobacteria      | Conexibacter woesei                   |
| tr A0A076MX42 A0A076MX42_AMYME | 1  | Actinobacteria  | Actinobacteria      | Amycolatopsis methanolica             |
| tr D5SYW1 D5SYW1_PLAL2         | 1  | Planctomycetes  | Planctomycetia      | Planctomyces limnophilus              |
| tr A0A068NM91 A0A068NM91_9BACT | 1  | Armatimonadetes |                     | Fimbriimonas ginsengisoli             |

|                                 |   |                  |                     |                                       |
|---------------------------------|---|------------------|---------------------|---------------------------------------|
| tr B4D2R0 B4D2R0_9BACT          | 1 | Verrucomicrobia  | Spartobacteria      | Chthoniobacter flavus                 |
| tr C1AEH1 C1AEH1_GEMAT          | 1 | Gemmatimonadetes | Gemmatimonadetes    | Gemmatimonas aurantiaca               |
| tr D6YWR8 D6YWR8_WADCW          | 1 | Chlamydiae       | Chlamydiia          | Waddlia chondrophila                  |
| tr A0A090D362 A0A090D362_9CHLA  | 1 | Chlamydiae       | Chlamydiia          | Criblamydia sequanensis               |
| tr A0A0C1JWL0 A0A0C1JWL0_9CHLA  | 1 | Chlamydiae       | Chlamydiia          | Candidatus Protochlamydia amoebophila |
| tr H0E8D6 H0E8D6_9ACTN          | 1 | Actinobacteria   | Actinobacteria      | Patulibacter medicamentivorans        |
| tr H0E615 H0E615_9ACTN          | 1 | Actinobacteria   | Actinobacteria      | Patulibacter medicamentivorans        |
| tr A0A076MU15 A0A076MU15_9AMYME | 2 | Actinobacteria   | Actinobacteria      | Amycolatopsis methanolica             |
| tr H0E9M2 H0E9M2_9ACTN          | 1 | Actinobacteria   | Actinobacteria      | Patulibacter medicamentivorans        |
| tr R6QJ33 R6QJ33_9CLOT          | 6 | Firmicutes       | Clostridia          | Clostridium sp. CAG:306               |
| tr D2R1T9 D2R1T9_PIRSD          | 1 | Planctomycetes   | Planctomycetia      | Pirellula staleyii                    |
| tr D1AD46 D1AD46_THECD          | 2 | Actinobacteria   | Actinobacteria      | Thermomonospora curvata               |
| tr A0A0C1DR60 A0A0C1DR60_9NOCA  | 1 | Actinobacteria   | Actinobacteria      | Nocardia vulneris                     |
| tr H0E5Y3 H0E5Y3_9ACTN          | 1 | Actinobacteria   | Actinobacteria      | Patulibacter medicamentivorans        |
| tr H0E6M5 H0E6M5_9ACTN          | 1 | Actinobacteria   | Actinobacteria      | Patulibacter medicamentivorans        |
| tr H0EAY6 H0EAY6_9ACTN          | 1 | Actinobacteria   | Actinobacteria      | Patulibacter medicamentivorans        |
| tr H0E7H9 H0E7H9_9ACTN          | 1 | Actinobacteria   | Actinobacteria      | Patulibacter medicamentivorans        |
| tr M8AXE3 M8AXE3_TRIUA          | 1 | Streptophyta     | Liliopsida          | Triticum urartu                       |
| tr F2NHU4 F2NHU4_DESAR          | 1 | Proteobacteria   | Deltaproteobacteria | Desulfobacca acetoxidans              |
| tr W7R1V4 W7R1V4_9ALTE          | 1 | Proteobacteria   | Gammaproteobacteria | Catenovulum agarivorans               |
| tr H0E5Y1 H0E5Y1_9ACTN          | 1 | Actinobacteria   | Actinobacteria      | Patulibacter medicamentivorans        |
| tr R5H6Y8 R5H6Y8_9SPIR          | 1 | Spirochaetes     | Spirochaetia        | Brachyspira sp. CAG:484               |
| tr R5DQ85 R5DQ85_9CLOT          | 1 | Firmicutes       | Clostridia          | Clostridium sp. CAG:715               |
| tr B5JTN8 B5JTN8_9GAMM          | 1 | Proteobacteria   | Gammaproteobacteria | gamma proteobacterium HTCC5015        |
| tr X1BXX8 X1BXX8_9ZZZZ          | 1 |                  |                     | marine sediment metagenome            |
| tr X8C7T7 X8C7T7_MYCXE          | 1 | Actinobacteria   | Actinobacteria      | Mycobacterium xenopi                  |
| tr J0P0C1 J0P0C1_9SPHI          | 1 | Bacteroidetes    | Shingobacteriia     | Saprospira grandis                    |

|                                |   |                  |                     |                                   |
|--------------------------------|---|------------------|---------------------|-----------------------------------|
| tr K0NE48 K0NE48_DESTT         | 1 | Proteobacteria   | Deltaproteobacteria | Desulfobacula toluolica           |
| tr S0FWQ6 S0FWQ6_9DELT         | 1 | Proteobacteria   | Deltaproteobacteria | Desulfotignum phosphitoxidans     |
| tr A8ZZZ7 A8ZZZ7_DESOH         | 1 | Proteobacteria   | Deltaproteobacteria | Desulfococcus oleovorans          |
| tr A0A0C1ZAS7 A0A0C1ZAS7_9DELT | 6 | Proteobacteria   | Deltaproteobacteria | Enhygromyxa salina                |
| tr L0D9L0 L0D9L0_SINAD         | 1 | Planctomycetes   | Planctomycetia      | Singulisphaera acidiphila         |
| tr E8R0Y9 E8R0Y9_ISOPI         | 1 | Planctomycetes   | Planctomycetia      | Isosphaera pallida                |
| tr H5SCE0 H5SCE0_9BACT         | 1 | Planctomycetes   | Planctomycetia      | uncultured planctomycete          |
| tr R7M8T4 R7M8T4_9CLOT         | 1 | Firmicutes       | Clostridia          | Clostridium sp. CAG:813           |
| tr K2DY95 K2DY95_9BACT         | 6 |                  |                     | uncultured bacterium              |
| tr W0RIJ3 W0RIJ3_9BACT         | 1 | Gemmatimonadetes | Gemmatimonadetes    | Gemmatimonadetes bacterium KBS708 |
| tr L0D8H7 L0D8H7_SINAD         | 1 | Planctomycetes   | Planctomycetia      | Singulisphaera acidiphila         |
| tr E8QZ15 E8QZ15_ISOPI         | 1 | Planctomycetes   | Planctomycetia      | Isosphaera pallida                |
| tr K2E2I3 K2E2I3_9BACT         | 1 |                  |                     | uncultured bacterium              |
| tr A0A081C4Z6 A0A081C4Z6_9BACT | 1 |                  |                     | bacterium UASB270                 |
| tr M5UNM7 M5UNM7_9PLAN         | 1 | Planctomycetes   | Planctomycetia      | Rhodopirellula sallentina         |
| tr C9RQK3 C9RQK3_FIBSS         | 1 | Fibrobacteres    | Fibrobacteria       | Fibrobacter succinogenes          |
| tr T1CFS9 T1CFS9_9ZZZZ         | 1 |                  |                     | mine drainage metagenome          |
| tr X8C791 X8C791_MYCXE         | 1 | Actinobacteria   | Actinobacteria      | Mycobacterium xenopi              |
| tr W6THL8 W6THL8_HOLOB         | 1 | Proteobacteria   | Alphaproteobacteria | Holospora obtusa                  |
